# Supplementary material for: Combination of multicomponent KA2 and Pauson–Khand reactions: short synthesis of spirocyclic pyrrolocyclopentenones
Source: publisher site journal article supplement (doi:10.3762/bjoc.16.23), 2020-02-12
Supplement: Additional file 1 [file 1860-5397-16-23-S1.pdf]

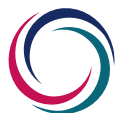

## Supporting Information

for

### **Combination of multicomponent KA<sup>2</sup> and Pauson–Khand reactions: short synthesis of spirocyclic pyrrolocyclopentenones**

Riccardo Innocenti, Elena Lenci, Gloria Menchi and Andrea Trabocchi

*Beilstein J. Org. Chem.* **2020**, *16*, 200–211. doi:10.3762/bjoc.16.23

**Table of reaction conditions for KA<sup>2</sup>; experimental procedures, characterization data and copies of <sup>1</sup>H and <sup>13</sup>C NMR spectra for all new compounds; copies of NOESY-1D, gCOSY, NOESY and cartesian coordinates of compound 36; Smiles codes, PCA and PMI data for compounds 3–39**

|                                                                                                                                                       |         |
|-------------------------------------------------------------------------------------------------------------------------------------------------------|---------|
| Table S1. Reaction conditions for KA <sup>2</sup>                                                                                                     | S2      |
| Experimental procedures and characterization data of compounds <b>3–5</b> , <b>7–9</b> ,<br><b>13–15</b> , <b>17–19</b> , <b>24–32</b> , <b>34–39</b> | S3–S17  |
| <sup>1</sup> H and <sup>13</sup> C NMR spectra of compounds <b>3–5</b> , <b>7–9</b> , <b>13–15</b> , <b>17–19</b> , <b>24–32</b> , <b>34–39</b>       | S18–S44 |
| Selected NOE contacts from NOESY1D spectra of compound <b>36</b>                                                                                      | S45     |
| gCOSY and NOESY spectra of compound <b>36</b>                                                                                                         | S46     |
| Table S2. Cartesian coordinates of compound <b>36</b> as in the PDB structure                                                                         | S47–S48 |
| Table S3. SMILES codes of newly-synthesized compounds <b>3–39</b>                                                                                     | S49     |
| Table S4. PCA results table for newly-synthesized compounds <b>3–39</b>                                                                               | S50     |
| Table S5. PMI ratio calculated for newly-synthesized compounds <b>3–39</b>                                                                            | S51     |

Table S1. Reaction conditions for KA<sup>2</sup>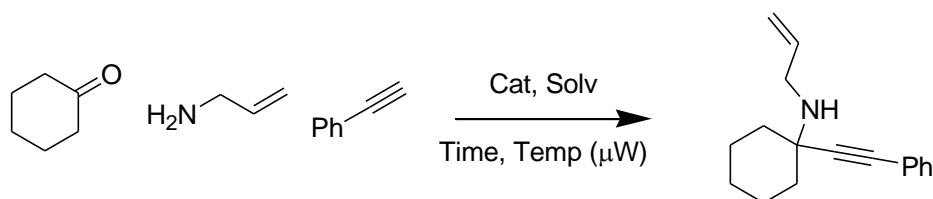

| Entry    | Catalyst          | Solvent  | Time       | Temperature, °C | Yield, %*        |
|----------|-------------------|----------|------------|-----------------|------------------|
| <b>1</b> | <b>CuI</b>        | <b>-</b> | <b>2 h</b> | <b>100</b>      | <b>79 (82)**</b> |
| 2        | CuI               | toluene  | 2 h        | 100             | 50               |
| 3        | CuI               | MeOH     | 2 h        | 100             | 62               |
| 4        | CuI               | THF      | 2 h        | 100             | 43               |
| 5        | CuBr              | —        | 2 h        | 100             | 72               |
| 6        | CuBr <sub>2</sub> | —        | 2 h        | 100             | 35               |
| 7        | AgOTf             | —        | 2 h        | 100             | 8                |
| 8        | CuI               | —        | 1 h        | 100             | 73               |
| 9        | CuI               | —        | 0.5 h      | 150             | 11               |
| 10       | CuI               | —        | 4 h        | 60              | 28               |

\* Measured by HPLC using a calibration curve (see Figure) and linear fitting of absorbance at  $\lambda = 223$  nm vs concentration in the range 0.2–1.25 mg/mL ( $y = 122.2x - 0.017$ ,  $R^2 = 0.996$ )

\*\* In parentheses, the isolated yield

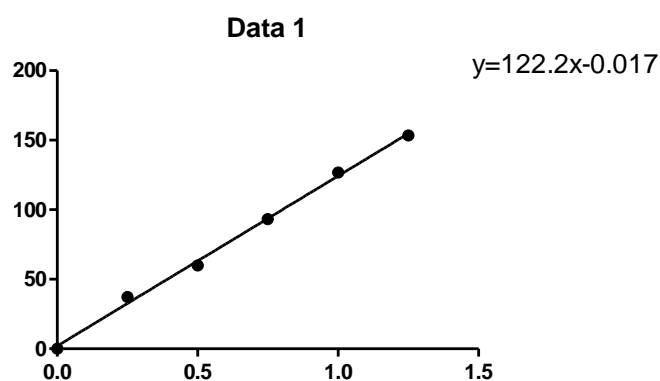

Reverse phase HPLC analyses were performed on an Alltima C18 column, 3  $\mu$ m, 50 mm x 4.6 mm, using water/acetonitrile (MeCN) eluent buffered with 0.1% (v/v) TFA with gradient 25 to 95% MeCN/5', then 95% MeCN/2'; RT of the product at 2.26 min.

**General.** Melting points are uncorrected. NMR spectra were recorded on a Varian Mercury 400 (400 MHz,  $^1\text{H}$ ; 100 MHz,  $^{13}\text{C}$ ), Varian Inova (400 MHz,  $^1\text{H}$ ; 100 MHz,  $^{13}\text{C}$ ) or on a Varian Gemini 200 (50 MHz,  $^{13}\text{C}$ ). The chemical shift values ( $\delta$ ) and coupling constants ( $J$ ) are expressed in parts per million (ppm) and hertz (Hz), respectively. Chemical shifts were referenced to residual non deuterated solvent ( $\text{CHCl}_3$   $^1\text{H}$ :  $\delta = 7.26$  ppm,  $^{13}\text{C}$ :  $\delta = 77.0$  ppm). Flash column chromatography (FCC) purifications were performed manually using glass columns with Merck silica gel (0.040–0.063 mm). TLC analyses were performed on Merck silica gel 60 F254 plates. Elemental analyses were performed on a Perkin Elmer C, H, N analyzer. ESI–MS spectra were recorded on a Thermo Scientific LCQ fleet ion-trap double quadrupole mass spectrometer using electrospray ( $\text{ES}^+$ ) ionization techniques. Microwave reactions were carried out on an Automated single-mode microwave synthesizer (Initiator<sup>TM</sup> Sixty, Biotage AB) using sealed reaction vessels and built-in internal pressure and temperature sensors. All commercially available reagents and solvents were used as received, unless otherwise specified.

**General Procedure (A) for the  $\text{KA}^2$  coupling reaction.**  $\text{CuI}$  (0.2 equiv) was added in a dry sealed vial for microwave synthesis under a nitrogen flow. Then, ketone (1 equiv), alkyne (1.2 equiv) and amine (1.2 equiv) were successively added under a nitrogen flow, and the mixture was heated under microwave irradiation to 100 °C for 2 h. Then,  $\text{EtOAc}$  was added and the organic phase was washed with 5%  $\text{NH}_4\text{OH}$  (3 x 20 mL) and brine. The organic phase was dried with  $\text{Na}_2\text{SO}_4$  and concentrated under reduced pressure. The crude product was purified by Flash Chromatography using the indicated solvent mixture as eluent.

**General Procedure (B) for the Amine Protection.** The  $\text{KA}^2$  product was dissolved in pyridine (2 mL/mmol) and acetic anhydride (4 mL/mmol) was added dropwise to the reaction mixture at 0 °C and. Then, the reaction mixture was heated to 40 °C for 16 h, followed by  $\text{EtOAc}$  addition. The organic phase was washed with 1M  $\text{HCl}$  (3 x 20 mL), satd.  $\text{Na}_2\text{CO}_3$  (3 x 20 mL) and brine. The

organic phase was dried over Na<sub>2</sub>SO<sub>4</sub> and concentrated under reduced pressure. The crude product was purified by Flash Chromatography using the indicated solvent mixture as eluent.

**General procedure for the Pauson-Khand (C) reaction.** In a dry round bottom flask under a nitrogen flow Co<sub>2</sub>(CO)<sub>8</sub> (0.1 equiv), *N, N, N', N'*-tetramethylthiourea (0.6 equiv) and a solution of the enyne compound (1 equiv) were successively added in dry toluene (20 mL/mmol). Then, the reaction mixture was kept under a CO atmosphere and stirred at 70 °C until disappearance of the starting material as monitored by TLC. Then, the mixture was filtered on Celite and concentrated under reduced pressure. The crude product was purified by Flash Chromatography using the indicated solvent mixture as eluent.

***N*-Allyl-1-(phenylethynyl)cyclohexanamine (3).** Compound **3** was obtained following the general procedure (A) using cyclohexanone (235 µL, 2.28 mmol), phenylacetylene (300 µL, 2.73 mmol), CuI (86 mg) and allylamine (200 µL, 2.68 mmol). The crude product was purified by flash chromatography with 3:1 hexane-EtOAc as eluent, to give **3** (446 mg) as a yellow oil in 82% yield. <sup>1</sup>H NMR (400 MHz, CDCl<sub>3</sub>) δ 7.47 – 7.40 (m, 2H), 7.35 – 7.27 (m, 3H), 6.00 (ddt, *J* = 16.3, 10.2, 6.1 Hz, 1H), 5.23 (dq, *J* = 17.2, 1.6 Hz, 1H), 5.09 (dd, *J* = 10.2, 1.6 Hz, 1H), 3.46 (d, *J* = 6.1 Hz, 2H), 1.96 (d, *J* = 13.0 Hz, 2H), 1.82 – 1.57 (m, 5H), 1.57 – 1.38 (m, 4H) ppm. <sup>13</sup>C NMR (100 MHz, CDCl<sub>3</sub>) δ 137.3, 131.6, 128.2, 127.7, 123.6, 115.7, 93.2, 84.8, 55.0, 46.3, 38.2, 25.9, 23.1 ppm. MS (ESI) *m/z* (%): 240.12 [(M + H)<sup>+</sup>, 100]. Anal. Calcd. for C<sub>17</sub>H<sub>21</sub>N: C, 85.30; H, 8.84; N, 5.85. Found: C, 85.75; H, 8.91; N, 5.79.

***N*-Allyl-*N*-(1-(phenylethynyl)cyclohexyl)acetamide (4).** Compound **4** was obtained following the general procedure (B) using compound **3** (446 mg, 1.86 mmol), pyridine (3.7 mL, 3.99 mmol) and acetic anhydride (7.5 mL). The crude product was purified by flash chromatography with 3:1 hexane-EtOAc as eluent, to give **4** (318 mg) as a yellow oil in 61% yield. <sup>1</sup>H NMR (400 MHz, CDCl<sub>3</sub>) δ 7.44 – 7.39 (m, 2H), 7.35 – 7.26 (m, 3H), 6.00 – 5.85 (m, 1H), 5.28 (dd, *J* = 17.2, 1.1 Hz, 1H), 5.21 (dd, *J* = 10.4, 1.1 Hz, 1H), 4.31 – 4.20 (m, 2H), 2.55 (br s, 2H), 2.15 (s, 3H), 2.00 (d, *J* =

11.8 Hz, 2H), 1.88 – 1.59 (m, 6H) ppm.  $^{13}\text{C}$  NMR (100 MHz,  $\text{CDCl}_3$ )  $\delta$  171.4, 135.4, 131.5, 128.2, 128.1, 123.2, 115.9, 90.5, 87.7, 49.9, 34.7, 25.2, 24.9, 24.1 ppm. MS (ESI)  $m/z$  (%): 304.12 [(M + Na) $^+$ , 100]. Anal. Calcd. for  $\text{C}_{19}\text{H}_{23}\text{NO}$ : C, 81.10; H, 8.24; N, 4.98. Found: C, 81.19; H, 8.30; N, 4.89.

**2'-Acetyl-6'-phenyl-3a',4'-dihydro-2'H-spiro[cyclohexane-1,1'-cyclopenta[c]pyrrol]-5'(3'H)-one (5).** Compound **5** was obtained following the general procedure (C) using compound **4** (318 mg, 1.13 mmol), toluene (23 mL),  $\text{Co}_2(\text{CO})_8$  (38 mg, 0.11 mmol), *N, N, N', N'*-tetramethylthiourea (87 mg, 0.66 mmol). The reaction mixture was heated for 7 h and the crude product was purified by flash chromatography with EtOAc as eluent to give **5** (240 mg) as a white solid in 73% yield. Mp = 177–180 °C.  $^1\text{H}$  NMR (400 MHz,  $\text{CDCl}_3$ )  $\delta$  7.45 – 7.31 (m, 3H), 7.11 (dt,  $J$  = 4.1, 2.3 Hz, 2H), 4.02 (t,  $J$  = 9.0 Hz, 1H), 3.50 – 3.43 (m, 1H), 3.22 – 3.08 (m, 1H), 2.97 (td,  $J$  = 13.7, 6.0 Hz, 1H), 2.85 – 2.73 (m, 1H), 2.77 (dd,  $J$  = 18.3, 6.6 Hz, 1H), 2.28 (dd,  $J$  = 18.3, 3.3 Hz, 1H), 2.10 (s, 3H), 1.67 – 1.53 (m, 4H), 1.30 – 1.07 (m, 4H) ppm.  $^{13}\text{C}$  NMR (50 MHz,  $\text{CDCl}_3$ )  $\delta$  207.1, 177.8, 168.9, 139.1, 129.2, 128.7, 79.3, 65.1, 53.2, 39.6, 38.6, 31.6, 29.1, 28.5, 24.8 ppm. MS (ESI)  $m/z$  (%): 332.06 [(M + H) $^+$ , 100]. Anal. Calcd. for  $\text{C}_{20}\text{H}_{23}\text{NO}_2$ : C, 77.64; H, 7.49; N, 4.53. Found: C, 78.01; H, 7.54; N, 4.46.

***N*-Allyl-1-(thiophen-3-ylethynyl)cyclohexanamine (7).** Compound **7** was obtained following the general procedure (A) using cyclohexanone (88  $\mu\text{L}$ , 0.84 mmol), 3-ethynylthiophene (100  $\mu\text{L}$ , 1.01 mmol), CuI (30 mg, 0.17 mmol) and allylamine (75  $\mu\text{L}$ , 1.01 mmol). The crude product was purified by flash chromatography with 2:1 hexane/EtOAc as eluent to give **7** (152 mg) as a yellow oil in 74% yield.  $^1\text{H}$  NMR (400 MHz,  $\text{CDCl}_3$ )  $\delta$  7.38 (dd,  $J$  = 3.0, 1.2 Hz, 1H), 7.25 – 7.24 (m, 1H), 7.09 (dd,  $J$  = 5.0, 1.2 Hz, 1H), 6.07 – 5.92 (m, 1H), 5.22 (dq,  $J$  = 17.2, 1.6 Hz, 1H), 5.09 (ddd,  $J$  = 10.2, 2.8, 1.3 Hz, 1H), 3.46 – 3.41 (m, 2H), 1.94 (d,  $J$  = 12.7 Hz, 2H), 1.70 – 1.63 (m, 6H), 1.51 – 1.40 (m, 3H) ppm.  $^{13}\text{C}$  NMR (100 MHz,  $\text{CDCl}_3$ )  $\delta$  137.3, 130.1, 127.8, 125.1, 122.6, 115.6, 93.0,

79.6, 55.0, 46.3, 38.2, 25.9, 23.0 ppm. MS (ESI)  $m/z$  (%): 268.22 [(M + Na)<sup>+</sup>, 100]. Anal. Calcd. for C<sub>15</sub>H<sub>19</sub>NS: C, 73.42; H, 7.80; N, 5.71. Found: C, 73.81; H, 7.99; N, 5.64.

***N*-Allyl-*N*-(1-(thiophen-2-ylethynyl)cyclohexyl)acetamide (8).** Compound **8** was obtained following the general procedure (B) using compound **7** (150 mg, 0.61 mmol), pyridine (1.1 mL, 1.36 mmol) and acetic anhydride (2.2 mL). The crude product was purified by flash chromatography with 2:1 hexane/EtOAc as eluent to give **8** (137 mg) as a yellow oil in 78% yield. <sup>1</sup>H NMR (400 MHz, CDCl<sub>3</sub>)  $\delta$  7.42 – 7.37 (m, 1H), 7.25 (ddd,  $J$  = 5.1, 2.9, 0.9 Hz, 1H), 7.09 (dd,  $J$  = 4.9, 1.1 Hz, 1H), 5.97 – 5.84 (m, 1H), 5.27 (d,  $J$  = 17.2 Hz, 1H), 5.20 (d,  $J$  = 10.5 Hz, 1H), 4.25 – 4.18 (m, 2H), 2.15 (s, 3H), 2.01 (d,  $J$  = 12.1 Hz, 2H), 1.82 – 1.57 (m, 8H) ppm. <sup>13</sup>C NMR (100 MHz, CDCl<sub>3</sub>)  $\delta$  171.4, 135.4, 129.8, 128.2, 125.5, 122.1, 115.9, 90.0, 82.7, 61.6, 49.7, 34.8, 25.2, 24.9, 24.0 ppm. MS (ESI)  $m/z$  (%): 300.20 [(M + H)<sup>+</sup>, 100]. Anal. Calcd. for C<sub>17</sub>H<sub>21</sub>NOS: C, 71.04; H, 7.36; N, 4.87. Found: C, 71.10; H, 7.43; N, 4.80.

**2'-Acetyl-6'-(thiophen-3-yl)-3a',4'-dihydro-2'*H*-spiro[cyclohexane-1,1'-cyclopenta[*c*]pyrrol]-5'(3'*H*)-one (9).** Compound **9** was obtained following the general procedure (C) using compound **8** (130 mg, 0.45 mmol), toluene (9 mL), Co<sub>2</sub>(CO)<sub>8</sub> (15 mg, 0.04 mmol), *N,N,N',N'*-tetramethylthiourea (40 mg, 0.3 mmol). The reaction mixture was heated for 4 h and the crude product was purified by flash chromatography with EtOAc as eluent to give **9** (96 mg) as a white solid in 68% yield. Mp = 183–186 °C. <sup>1</sup>H NMR (400 MHz, CDCl<sub>3</sub>)  $\delta$  7.36 (dd,  $J$  = 4.9, 3.0 Hz, 1H), 7.09 (dd,  $J$  = 2.8, 1.0 Hz, 1H), 6.89 (dd,  $J$  = 4.9, 1.0 Hz, 1H), 4.00 (dd,  $J$  = 19.4, 10.4 Hz, 1H), 3.50 – 3.37 (m, 1H), 3.22 – 3.06 (m, 1H), 2.97 (td,  $J$  = 13.4, 5.5 Hz, 1H), 2.83 – 2.69 (m, 2H), 2.31 – 2.22 (m, 1H), 2.08 (s, 3H), 1.59 (t,  $J$  = 14.9 Hz, 4H), 1.42 – 1.06 (m, 6H) ppm. <sup>13</sup>C NMR (100 MHz, CDCl<sub>3</sub>)  $\delta$  207.7, 181.22, 168.8, 134.1, 132.3, 128.7, 126.0, 124.7, 67.8, 52.9, 39.8, 38.1, 32.7, 28.9, 25.3, 24.1, 23.4, 21.9 ppm. MS (ESI)  $m/z$  (%): 316.14 [(M + H)<sup>+</sup>, 100]. Anal. Calcd. for C<sub>18</sub>H<sub>21</sub>NO<sub>2</sub>S: C, 68.54; H, 6.71; N, 4.44. Found: C, 68.71; H, 6.76; N, 4.40.

***N*-Allyl-1-(phenylethynyl)cyclopentanamine (13).** Compound **13** was obtained following the general procedure (A) using cyclopentanone (100  $\mu$ L, 1.13 mmol), phenylacetylene (150  $\mu$ L, 1.36 mmol), CuI (43 mg, 0.23 mmol) and allylamine (100  $\mu$ L, 1.36 mmol). The crude product was purified by flash chromatography with 3:1 hexane/EtOAc as eluent to give **13** (156 mg) as a yellow oil in 61% yield.  $^1\text{H}$  NMR (400 MHz,  $\text{CDCl}_3$ )  $\delta$  7.40 (dd,  $J$  = 6.5, 3.2 Hz, 2H), 7.31 – 7.27 (m, 3H), 6.05 – 5.95 (m, 1H), 5.23 (dd,  $J$  = 17.2, 1.6 Hz, 1H), 5.09 (dd,  $J$  = 10.2, 1.3 Hz, 1H) 3.44 (d,  $J$  = 6.0 Hz, 2H), 2.04 (dd,  $J$  = 13.9, 7.4 Hz, 2H), 1.90 – 1.73 (m, 6H).  $^{13}\text{C}$  NMR (100 MHz,  $\text{CDCl}_3$ )  $\delta$  137.6, 136.1, 131.6, 129.7, 128.3, 128.2, 126.7, 116.5, 89.9, 84.9, 49.9, 48.3, 42.1, 40.6, 23.8 ppm. MS (ESI)  $m/z$  (%): 226.19  $[(\text{M} + \text{H})^+]$ , 100]. Anal. Calcd. for  $\text{C}_{16}\text{H}_{19}\text{N}$ : C, 85.28; H, 8.50; N, 6.22. Found: C, 85.47; H, 8.59; N, 6.14.

***N*-Allyl-*N*-(1-(phenylethynyl)cyclopentyl)acetamide (14).** Compound **14** was obtained following the general procedure (B) using compound **14** (150 mg, 0.67 mmol), pyridine (1.34 mL, 1.66 mmol) and acetic anhydride (2.68 mL). The crude product was purified by flash chromatography with 4:1 hexane-EtOAc as eluent to give **14** (100 mg) as a yellow oil in 56% yield.  $^1\text{H}$  NMR (400 MHz,  $\text{CDCl}_3$ )  $\delta$  7.40 – 7.35 (m, 2H), 7.35 – 7.26 (m, 3H), 6.00 – 5.88 (m, 1H), 5.32 – 5.17 (m, 2H), 4.20 – 4.11 (m, 2H), 2.47 – 2.42 (m, 2H), 2.19 – 2.09 (m, 3H), 2.09 (s, 3H), 1.92 – 1.76 (m, 3H) ppm.  $^{13}\text{C}$  NMR (50 MHz,  $\text{CDCl}_3$ )  $\delta$  171.8, 151.1, 135.3, 134.7, 131.6, 131.5, 129.7, 128.3, 128.2, 127.9, 126.8, 92.9, 82.9, 63.9, 49.9, 40.2, 29.7, 23.3 ppm. MS (ESI)  $m/z$  (%): 290.23  $[(\text{M} + \text{Na})^+]$ , 100]. Anal. Calcd. for  $\text{C}_{18}\text{H}_{21}\text{NO}$ : C, 80.86; H, 7.92; N, 5.24. Found: C, 81.17; H, 8.01; N, 5.16.

**2'-Acetyl-6'-phenyl-3a',4'-dihydro-2'*H*-spiro[cyclopentane-1,1'-cyclopenta[*c*]pyrrol]-5'(3'*H*)-one (15).** Compound **15** was obtained following the general procedure (C) using compound **14** (80 mg, 0.29 mmol),  $\text{Co}_2(\text{CO})_8$  (10 mg, 0.03 mmol), *N,N,N',N'*-tetramethylthiourea (24 mg, 0.18 mmol). The reaction mixture was heated for 6 h and the crude product was purified by flash chromatography with EtOAc as eluent to give **15** (61 mg) as a yellow oil in 72% yield.  $^1\text{H}$  NMR (400 MHz,  $\text{CDCl}_3$ )  $\delta$  7.48 – 7.29 (m, 3H), 7.14 (dd,  $J$  = 7.8, 1.6 Hz, 2H), 4.03 (t,  $J$  = 9.1 Hz, 1H),



3.50 – 3.39 (m, 1H), 3.17 (dd,  $J = 11.2, 9.6$  Hz, 1H), 2.81 (dd,  $J = 18.0, 6.6$  Hz, 1H), 2.58 (dt,  $J = 13.2, 8.0$  Hz, 1H), 2.34 (dd,  $J = 18.0, 3.6$  Hz, 1H), 2.24 – 2.13 (m, 2H), 2.08 (s, 3H), 2.01 – 1.88 (m, 2H), 1.75 (ddd,  $J = 13.5, 9.8, 5.6$  Hz, 1H), 1.71 – 1.58 (m, 3H) ppm.  $^{13}\text{C}$  NMR (100 MHz,  $\text{CDCl}_3$ )  $\delta$  207.1, 183.3, 168.2, 136.0, 129.6, 128.3, 72.5, 52.8, 40.9, 40.2, 39.1, 34.9, 27.3, 27.1, 24.5 ppm. MS (ESI)  $m/z$  (%): 318.14  $[(\text{M} + \text{Na})^+, 100]$ . Anal. Calcd. for  $\text{C}_{19}\text{H}_{21}\text{NO}_2$ : C, 77.26; H, 7.17; N, 4.74. Found: C, 77.68; H, 7.26; N, 4.69.

***N*-Allyl-4-methyl-1-(phenylethynyl)cyclohexanamine (17).** Compound **17** was obtained following the general procedure (A) using 4-methylcyclohexanone (200  $\mu\text{L}$ , 1.63 mmol), phenylacetylene (214  $\mu\text{L}$ , 1.95 mmol), CuI (60 mg, 0.32 mmol) and allylamine (145  $\mu\text{L}$ , 1.95 mmol). The crude product was purified by flash chromatography with 3:1 hexane/EtOAc as eluent to give **17** (338 mg) as a yellow oil in 82% yield.  $^1\text{H}$  NMR (400 MHz,  $\text{CDCl}_3$ )  $\delta$  7.46 – 7.40 (m, 2H), 7.33 – 7.27 (m, 3H), 6.03 – 5.96 (m, 1H), 5.27 – 5.18 (m, 1H), 5.09 (dd,  $J = 10.2, 1.6$  Hz, 1H), 3.47 (d,  $J = 6.1$  Hz, 2H), 2.02 (dd,  $J = 26.2, 8.1$  Hz, 2H), 1.50 – 1.36 (m, 7H), 0.93 (d,  $J = 5.4$  Hz, 3H) ppm.  $^{13}\text{C}$  NMR (100 MHz,  $\text{CDCl}_3$ )  $\delta$  137.3, 131.6, 128.2, 127.8, 123.6, 115.7, 92.9, 85.1, 55.1, 46.53, 38.3, 32.4, 31.9, 22.2 ppm. MS (ESI)  $m/z$  (%): 276.15  $[(\text{M} + \text{Na})^+, 100]$ . Anal. Calcd. for  $\text{C}_{18}\text{H}_{23}\text{NO}$ : C, 85.32; H, 9.15; N, 5.53. Found: C, 85.78; H, 9.24; N, 5.47.

***N*-Allyl-*N*-(4-methyl-1-(phenylethynyl)cyclohexyl)acetamide (18).** Compound **18** was obtained following the general procedure (B) using compound **17** (230 mg, 0.9 mmol), pyridine (1.8 mL, 2.23 mmol) and acetic anhydride (3.6 mL). The crude product was purified by flash chromatography with 3:1 hexane/EtOAc as eluent to give **18** (180 mg) as a yellow oil in 68% yield.  $^1\text{H}$  NMR (400 MHz,  $\text{CDCl}_3$ )  $\delta$  7.42 – 7.40 (m, 2H), 7.34 – 7.28 (m, 3H), 5.93 (ddd,  $J = 15.2, 9.8, 4.6$  Hz, 1H), 5.28 (d,  $J = 15.2$  Hz, 1H), 5.21 (d,  $J = 10.5$  Hz, 1H), 4.28 – 4.23 (m, 2H), 2.16 (s, 3H), 2.01 (d,  $J = 12.1$  Hz, 2H), 1.73 – 1.40 (m, 7H), 0.91 (d,  $J = 5.3$  Hz, 3H) ppm.  $^{13}\text{C}$  NMR (100 MHz,  $\text{CDCl}_3$ )  $\delta$  171.4, 135.5, 131.4, 128.2, 128.1, 123.2, 115.9, 90.6, 87.7, 34.5, 32.6, 31.4, 25.2, 22.3

ppm. MS (ESI)  $m/z$ (%): 296.20 [(M + H)<sup>+</sup>, 100]. Anal. Calcd. for C<sub>20</sub>H<sub>25</sub>NO: C, 81.31; H, 8.53; N, 4.74. Found: C, 81.89; H, 8.61; N, 4.68.

**2'-Acetyl-4-methyl-6'-phenyl-3a',4'-dihydro-2'H-spiro[cyclohexane-1,1'-cyclopenta[c]pyrrol]-5'(3'H)-one (19).** Compound **19** was obtained following the general procedure (C) using compound **18** (180 mg, 0.62 mmol), Co<sub>2</sub>(CO)<sub>8</sub> (20 mg, 0.06 mmol), *N,N,N',N'*-tetramethylthiourea (48 mg, 0.36 mmol). The reaction mixture was heated for 8 h and the crude product was purified by flash chromatography with 3:1 hexane-EtOAc as eluent to give **19** (144 mg) as a white solid in 72% yield. Mp = 176–177 °C. <sup>1</sup>H NMR (400 MHz, CDCl<sub>3</sub>) δ 7.38 (d, *J* = 6.0 Hz, 3H), 7.17 – 7.07 (m, 2H), 4.02 (td, *J* = 9.2, 3.3 Hz, 1H), 3.56 – 3.41 (m, 1H), 3.15 (t, *J* = 10.5 Hz, 1H), 3.05 (td, *J* = 13.7, 6.0 Hz, 1H), 2.97 – 2.83 (m, 1H), 2.83 – 2.73 (m, 1H), 2.28 (dd, *J* = 18.3, 1.9 Hz, 1H), 2.10 (d, *J* = 7.0 Hz, 3H), 1.65 – 1.19 (m, 8H), 0.51 (d, *J* = 6.5 Hz, 1H) ppm. <sup>13</sup>C NMR (100 MHz, CDCl<sub>3</sub>) δ 207.9, 179.8, 168.8, 168.7, 138.8, 133.2, 129.4, 129.2, 128.4, 128.2, 67.7, 53.0, 39.8, 38.3, 38.1, 28.6, 28.5, 27.7, 26.3, 21.9 ppm. MS (ESI)  $m/z$  (%): 346.25 [(M + Na)<sup>+</sup>, 100]. Anal. Calcd. for C<sub>21</sub>H<sub>25</sub>NO<sub>2</sub>: C, 77.98; H, 7.79; N, 4.33. Found: C, 78.32; H, 7.86; N, 4.26.

***N*-tert-Butyl 4-(allylamino)-4-(phenylethynyl)piperidine-1-carboxylate (24).** Compound **24** was obtained following the general procedure (A) using *tert*-butyl 4-oxopiperidine-1-carboxylate (220 mg, 1.11 mmol), phenylacetylene (146 μL, 1.33 mmol), CuI (42 mg, 0.22 mmol) and allylamine (100 μL, 1.33 mmol). The crude product was purified by flash chromatography with 1:1 hexane/EtOAc as eluent to give **24** (313 mg) as a yellow oil in 83% yield. <sup>1</sup>H NMR (400 MHz, CDCl<sub>3</sub>) δ 7.40 (ddd, *J* = 4.2, 2.9, 1.7 Hz, 2H), 7.34 – 7.26 (m, 3H), 6.00 – 5.93 (m, 1H), 5.22 (dd, *J* = 17.2, 1.6 Hz, 1H), 5.09 (dd, *J* = 10.2, 1.4 Hz, 1H), 3.97 (pd, *J* = 24.4 Hz, 2H), 3.43 (d, *J* = 6.0 Hz, 2H), 3.18 (ps, 2H), 1.88 (d, *J* = 12.0 Hz, 2H), 1.59 (td, *J* = 12.7, 3.9 Hz, 2H), 1.44 (s, 9H) ppm. <sup>13</sup>C NMR (50 MHz, CDCl<sub>3</sub>) δ 154.8, 137.0, 131.7, 128.3, 128.2, 123.0, 115.9, 91.3, 85.8, 79.4, 53.7, 46.3, 40.8, 37.5, 28.5 ppm. MS (ESI)  $m/z$  (%): 341.22 [(M + H)<sup>+</sup>, 100]. Anal. Calcd. for C<sub>21</sub>H<sub>28</sub>N<sub>2</sub>O<sub>2</sub>: C, 74.08; H, 8.29; N, 8.23. Found: C, 74.53; H, 8.37; N, 8.15.

***N*-tert-Butyl 4-(*N*-allylacetamido)-4-(phenylethynyl)piperidine-1-carboxylate (25).** Compound **25** was obtained following the general procedure (B) using compound **24** (300 mg, 0.88 mmol), pyridine (1.66 mL, 2.06 mmol) and acetic anhydride (3.32 mL). The crude product was purified by flash chromatography with 1:1 hexane/EtOAc as eluent to give **25** (211 mg) as a yellow oil in 63% yield. <sup>1</sup>H NMR (400 MHz, CDCl<sub>3</sub>) δ 7.45 – 7.39 (m, 2H), 7.34 – 7.28 (m, 3H), 6.09 – 5.80 (m, 1H), 5.31 (dd, *J* = 17.2, 1.0 Hz, 1H), 5.24 (dd, *J* = 10.5, 1.1 Hz, 1H), 4.24 – 4.21 (m, 2H), 4.17 – 4.06 (m, 2H), 3.17 (ps, 2H), 2.57 (td, *J* = 12.6, 4.4 Hz, 2H), 2.15 (s, 3H), 2.05 (d, *J* = 11.6 Hz, 2H), 1.46 (s, 9H) ppm. <sup>13</sup>C NMR (50 MHz, CDCl<sub>3</sub>) δ 171.5, 152.3, 135.1, 131.6, 128.48, 128.3, 122.6, 116.3, 92.5, 88.2, 79.6, 59.6, 49.6, 41.6, 34.5, 28.5, 24.9 ppm. MS (ESI) *m/z* (%): 383.25 [(*M* + *H*)<sup>+</sup>, 100]. Anal. Calcd. for C<sub>23</sub>H<sub>30</sub>N<sub>2</sub>O<sub>3</sub>: C, 72.22; H, 7.91; N, 7.32. Found: C, 72.58; H, 7.99; N, 7.24.

***N*-tert-Butyl 2-acetyl-5-oxo-6-phenyl-3,3a,4,5-tetrahydro-2*H*-spiro[cyclopenta[*c*]pyrrole-1,4'-piperidine]-1'-carboxylate (26).** Compound **26** was obtained following the general procedure (C) using compound **26** (203 mg, 0.53 mmol), toluene (10 mL), Co<sub>2</sub>(CO)<sub>8</sub> (17 mg, 0.05 mmol), *N,N,N',N'*-tetramethylthiourea (40 mg, 0.3 mmol). The reaction mixture was heated for 3 h and the crude product was purified by flash chromatography with 3:1 hexane/EtOAc as eluent to give **26** (171 mg) as a yellow oil in 79% yield. <sup>1</sup>H NMR (400 MHz, CDCl<sub>3</sub>) δ 7.39 – 7.36 (m, 3H), 7.15 – 7.06 (m, 1H), 4.04 (t, *J* = 9.1 Hz, 1H), 3.89 – 3.68 (m, 1H), 3.55–3.46 (m, 2H), 3.24 – 3.12 (m, 1H), 2.84 (m, 3H), 2.80 (dd, *J* = 18.3, 6.7 Hz, 1H), 2.34 – 2.29 (m, 1H), 2.19 (s, 3H), 2.09 (s, 1H), 1.85 – 1.56 (m, 3H), 1.39 (d, *J* = 17.3 Hz, 9H) ppm. <sup>13</sup>C NMR (50 MHz, CDCl<sub>3</sub>) δ 207.1, 177.8, 168.9, 139.1, 129.2, 128.7, 79.3, 65.1, 53.1, 39.6, 38.6, 31.6, 29.1, 28.5, 24.8 ppm. MS (ESI) *m/z* (%): 433.15 [(*M* + Na)<sup>+</sup>, 100]. Anal. Calcd. for C<sub>24</sub>H<sub>30</sub>N<sub>2</sub>O<sub>4</sub>: C, 70.22; H, 7.37; N, 6.82. Found: C, 70.80; H, 7.45; N, 6.75.

***N*-tert-Butyl 4-(allylamino)-4-(thiophen-3-ylethynyl)piperidine-1-carboxylate (27).** Compound **27** was obtained following the general procedure (A) using *N*-tert-butyl 4-oxopiperidine-1-carboxylate (218 mg, 1.1 mmol), 3-ethynylthiophene (130 μL, 1.32 mmol), CuI (41 mg, 0.22

mmol) and allylamine (100  $\mu$ L, 1.32 mmol). The crude product was purified by flash chromatography with 1:1 hexane-diethyl ether as eluent to give **27** (235 mg) as a white solid in 62% yield. Mp = 153–156 °C.  $^1\text{H}$  NMR (400 MHz,  $\text{CDCl}_3$ )  $\delta$  7.40 (dd,  $J$  = 3.0, 1.1 Hz, 1H), 7.27 – 7.25 (m, 1H), 7.08 (dd,  $J$  = 5.0, 1.1 Hz, 1H), 5.97 (ddt,  $J$  = 16.3, 10.2, 6.0 Hz, 1H), 5.23 (dq,  $J$  = 17.2, 1.5 Hz, 1H), 5.10 (dd,  $J$  = 10.2, 1.3 Hz, 1H), 3.96 (ps, 2H), 3.47 – 3.38 (m, 3H), 3.21 – 3.16 (m, 2H), 1.89 (d,  $J$  = 12.5 Hz, 2H), 1.60 (td,  $J$  = 12.4, 4.0 Hz, 2H), 1.45 (s, 9H) ppm.  $^{13}\text{C}$  NMR (100 MHz,  $\text{CDCl}_3$ )  $\delta$  154.7, 136.9, 129.9, 128.4, 125.3, 121.9, 115.9, 90.7, 80.7, 79.5, 53.7, 46.2, 28.4 ppm. MS (ESI)  $m/z$  (%): 347.18  $[(\text{M} + \text{H})^+, 100]$ . Anal. Calcd. for  $\text{C}_{19}\text{H}_{26}\text{N}_2\text{O}_2\text{S}$ : C, 65.86; H, 7.56; N, 8.08. Found: C, 66.01; H, 7.62; N, 8.00.

***N*-tert-Butyl 4-(*N*-allylacetamido)-4-(thiophen-3-ylethynyl)piperidine-1-carboxylate (28).**

Compound **28** was obtained following the general procedure (B) using compound **27** (221 mg, 0.63 mmol), pyridine (1.26 mL, 1.56 mmol) and acetic anhydride (2.52 mL). The crude product was purified by flash chromatography with 2:1 hexane-diethyl ether as eluent to give **28** (153 mg) as a yellow oil in 63 % yield.  $^1\text{H}$  NMR (400 MHz,  $\text{CDCl}_3$ )  $\delta$  7.41 (d,  $J$  = 1.7 Hz, 1H), 7.27 – 7.25 (m, 1H), 7.08 (d,  $J$  = 4.9 Hz, 1H), 5.89 (ddd,  $J$  = 15.0, 9.9, 4.5 Hz, 1H), 5.29 (d,  $J$  = 17.3 Hz, 1H), 5.23 (d,  $J$  = 10.5 Hz, 1H), 4.19 – 4.05 (m, 4H), 3.14 (ps, 2H), 2.55 – 2.44 (m, 2H), 2.14 (s, 3H), 2.06 (d,  $J$  = 11.8 Hz, 2H), 1.45 (s, 9H) ppm.  $^{13}\text{C}$  NMR (100 MHz,  $\text{CDCl}_3$ )  $\delta$  171.5, 154.6, 134.9, 129.8, 128.8, 125.4, 121.5, 116.3, 88.1, 83.3, 79.6, 59.4, 49.4, 34.4, 28.4, 24.9 ppm. MS (ESI)  $m/z$  (%): 411.19  $[(\text{M} + \text{Na})^+, 100]$ . Anal. Calcd. for  $\text{C}_{21}\text{H}_{28}\text{N}_2\text{O}_3\text{S}$ : C, 64.92; H, 7.26; N, 7.21. Found: C, 65.31; H, 7.31; N, 7.17.

***N*-tert-Butyl 2-acetyl-5-oxo-6-(thiophen-2-yl)-3,3a,4,5-tetrahydro-2H-spiro[cyclopenta[*c*]pyrrole-1,4'-piperidine]-1'-carboxylate (29).**

Compound **29** was obtained following the general procedure (C) using compound **28** (149 mg, 0.38 mmol), toluene (7.6 mL)  $\text{Co}_2(\text{CO})_8$  (14 mg, 0.04 mmol), *N,N,N',N'*-tetramethylthiourea (32 mg, 0.24 mmol). The reaction mixture was heated for 3 h and the crude product was purified by flash chromatography with EtOAc

as eluent to give **29** (108 mg) as a yellow oil in 68% yield.  $^1\text{H}$  NMR (400 MHz,  $\text{CDCl}_3$ )  $\delta$  7.37 (dd,  $J = 4.9, 3.0$  Hz, 1H), 7.09 (dd,  $J = 2.8, 1.0$  Hz, 1H), 6.90 (dd,  $J = 4.9, 1.0$  Hz, 1H), 4.15 (dd,  $J = 17.0, 7.9$  Hz, 1H), 3.99 – 3.79 (m, 1H), 3.72 – 3.56 (m, 1H), 3.29 (t,  $J = 10.2$  Hz, 1H), 2.90 (dd,  $J = 18.3, 6.7$  Hz, 1H), 2.79 – 2.72 (m, 1H), 2.42 (dd,  $J = 18.3, 3.2$  Hz, 1H), 2.34 – 2.26 (m, 1H), 2.19 (s, 3H), 1.93 – 1.63 (m, 2H), 1.49 (d,  $J = 17.3$  Hz, 9H) ppm.  $^{13}\text{C}$  NMR (100 MHz,  $\text{CDCl}_3$ )  $\delta$  209.7, 183.2, 170.8, 136.1, 134.3, 130.7, 128.0, 126.7, 78.3, 64.1, 52.1, 38.6, 37.6, 30.6, 28.1, 27.5, 23.8 ppm. MS (ESI)  $m/z$  (%): 417.20  $[(\text{M} + \text{H})^+, 100]$ . Anal. Calcd. for  $\text{C}_{22}\text{H}_{28}\text{N}_2\text{O}_4\text{S}$ : C, 63.44; H, 6.78; N, 6.73. Found: C, 63.74; H, 6.85; N, 6.68.

***N*-tert-Butyl 4-(*N*-allylbenzamido)-4-(phenylethynyl)piperidine-1-carboxylate (30).** Compound **24** (540 mg, 1.58 mmol) was dissolved in pyridine (3.15 mL) and the reaction mixture was kept to 0 °C while adding tosyl chloride (780  $\mu\text{L}$ , 9.45 mmol) portionwise. Then, the reaction mixture was heated to 40 °C for 16 h. Then, EtOAc was added and the organic phase was washed with 1M HCl (3  $\times$  20 mL), satd.  $\text{Na}_2\text{CO}_3$  (3  $\times$  20 mL) and brine. The organic phase was dried with  $\text{Na}_2\text{SO}_4$  and concentrated under reduced pressure. The crude product was purified by Flash Chromatography using a mixture of 4:1 hexane/diethyl ether, to give pure **30** (448 mg) as a pale yellow oil in a yield of 68%.  $^1\text{H}$  NMR (400 MHz,  $\text{CDCl}_3$ )  $\delta$  7.44 (dd,  $J = 6.7, 3.1$  Hz, 2H), 7.41 – 7.35 (m, 5H), 7.32 (dd,  $J = 5.0, 1.8$  Hz, 3H), 5.86 (ddt,  $J = 15.9, 10.4, 5.1$  Hz, 1H), 5.17 (ps, 2H), 5.14 (dd,  $J = 8.3, 1.1$  Hz, 2H), 4.16 (d,  $J = 5.1$  Hz, 2H), 3.33 – 3.14 (m, 2H), 2.69 (td,  $J = 12.5, 4.5$  Hz, 2H), 2.20 (d,  $J = 12.2$  Hz, 2H), 1.47 (s, 9H) ppm.  $^{13}\text{C}$  NMR (100 MHz,  $\text{CDCl}_3$ ) mixture of rotamers  $\delta$  173.1, 154.7, 138.4, 136.1, 131.6, 129.4, 128.4, 128.3, 128.3, 126.4, 122.6, 116.8, 88.6, 79.6, 59.3, 51.2, 41.2, 34.2, 28.5, 28.4 ppm. MS (ESI)  $m/z$  (%): 467.30  $[(\text{M} + \text{Na})^+, 100]$ . Anal. Calcd. for  $\text{C}_{28}\text{H}_{32}\text{N}_2\text{O}_3$ : C, 75.65; H, 7.26; N, 6.30. Found: C, 75.89; H, 7.34; N, 6.19.

***N*-tert-Butyl 2-benzoyl-5-oxo-6-phenyl-3,3a,4,5-tetrahydro-2*H*-spiro[cyclopenta[*c*]pyrrole-1,4'-piperidine]-1'-carboxylate (31).** Compound **31** was obtained following the general procedure (C) using compound **30** (430 mg, 0.96 mmol), toluene (19.2 mL),  $\text{Co}_2(\text{CO})_8$  (34 mg, 0.1 mmol), *N*,

*N, N', N''*-tetramethylthiourea (80 mg, 0.6 mmol). The reaction mixture was heated for 3 h and the crude product was purified by flash chromatography with 3:1 hexane/EtOAc as eluent to give **31** (353 mg) as a white solid in 78% of yield. Mp = 217–219 °C. <sup>1</sup>H NMR (400 MHz, CDCl<sub>3</sub>) δ 7.41 (ps, 8H), 7.14 (d, *J* = 6.8 Hz, 2H), 4.06 – 3.87 (m, 1H), 3.83 (dd, *J* = 9.9, 8.4 Hz, 1H), 3.67 – 3.29 (m, 1H), 3.21 (t, *J* = 10.5, 1H), 2.96 – 2.79 (m, 2H), 2.72 (dd, *J* = 18.4, 6.6 Hz, 1H), 2.24 (dd, *J* = 18.5, 3.1 Hz, 1H), 2.16 – 2.05 (m, 1H), 1.92 – 1.77 (m, 1H), 1.73 – 1.66 (m, 2H), 1.41 (d, *J* = 21.8 Hz, 1H) ppm. <sup>13</sup>C NMR (100 MHz, CDCl<sub>3</sub>) mixture of rotamers δ 207.3, 193.5, 179.5, 169.6, 154.7, 146.7, 137.8, 129.9, 129.1, 128.8, 128.6, 126.3, 79.4, 65.6, 55.3, 38.2, 31.6, 28.4 ppm. MS (ESI) *m/z* (%): 473.26 [(M + H)<sup>+</sup>, 100]. Anal. Calcd. for C<sub>29</sub>H<sub>32</sub>N<sub>2</sub>O<sub>4</sub>: C, 73.70; H, 6.83; N, 5.93. Found: C, 74.11; H, 6.92; N, 5.88.

***N*-tert-Butyl 4-(*N*-allyl-4-methylphenylsulfonamido)-4-(phenylethynyl)piperidine-1-carboxylate (32).** Compound **24** (360 mg, 1.05 mmol) was dissolved in pyridine (2.1 mL) and while maintaining the reaction mixture at 0 °C tosyl chloride (1200 mg, 6.30 mmol) was added portionwise, and the reaction mixture was heated to 40 °C for 16 h. Then, EtOAc was added and the organic phase was washed with 1M HCl (3 × 20 mL), satd. Na<sub>2</sub>CO<sub>3</sub> (3 × 20 mL) and brine. The organic phase was dried with Na<sub>2</sub>SO<sub>4</sub> and concentrated under reduced pressure. The crude product was purified by flash chromatography using a mixture of 3:1 hexane-diethyl ether, to give pure **32** (326 mg) as a yellow oil in a yield of 63%. <sup>1</sup>H NMR (400 MHz, CDCl<sub>3</sub>) δ 7.75 (d, *J* = 8.3 Hz, 1H), 7.33 – 7.24 (m, 2H), 7.23 – 7.14 (m, 2H), 6.04 (dq, *J* = 10.6, 5.6 Hz, 1H), 5.31 (d, *J* = 17.3 Hz, 1H), 5.19 (d, *J* = 10.3 Hz, 1H), 4.19 (ps, 2H), 4.05 (ps, 2H), 3.06 (s, 1H), 2.33 (ps, 4H), 1.45 (s, 9H) ppm. <sup>13</sup>C NMR (100 MHz, CDCl<sub>3</sub>) δ 179.6, 154.4, 143.2, 138.8, 136.8, 131.5, 129.4, 128.6, 128.2, 127.5, 121.9, 116.9, 87.9, 87.1, 79.8, 60.9, 50.3, 28.4, 21.4 ppm. MS (ESI) *m/z* (%): 417.20 [(M + Na)<sup>+</sup>, 100]. Anal. Calcd. for C<sub>28</sub>H<sub>34</sub>N<sub>2</sub>O<sub>4</sub>S: C, 67.99; H, 6.93; N, 5.66. Found: C, 68.34; H, 7.02; N, 5.58.

***N*-Allyl-4-(phenylethynyl)-1-tosylpiperidin-4-amine (34).** Compound **34** was obtained following the general procedure (A) using 1-tosylpiperidin-4-one (370 mg, 0.93 mmol), phenylacetylene (122  $\mu$ L, 1.12 mmol), CuI (35 mg, 0.19 mmol) and allylamine (85  $\mu$ L 1.12 mmol). The crude product was purified by flash chromatography with 2:1 hexane/EtOAc as eluent to give **34** (259 mg) as a yellow oil in 71% yield.  $^1\text{H}$  NMR (400 MHz,  $\text{CDCl}_3$ )  $\delta$  7.67 (d,  $J$  = 8.2 Hz, 2H), 7.33 (d,  $J$  = 8.1 Hz, 2H), 7.25 – 7.21 (m, 2H), 7.16 – 7.12 (m, 3H), 5.93 (ddt,  $J$  = 16.3, 10.3, 6.0 Hz, 1H), 5.20 (dd,  $J$  = 17.2, 1.6 Hz, 1H), 5.08 (dd,  $J$  = 10.2, 1.3 Hz, 1H), 3.61 (dt,  $J$  = 11.8, 3.7 Hz, 2H), 3.37 (d,  $J$  = 6.0 Hz, 2H), 2.81 (td,  $J$  = 11.6, 2.6 Hz, 2H), 2.43 (s, 3H), 1.96 (d,  $J$  = 12.9 Hz, 2H), 1.82 – 1.73 (m, 2H).  $^{13}\text{C}$  NMR (100 MHz,  $\text{CDCl}_3$ )  $\delta$  143.4, 136.7, 133.2, 131.4, 129.7, 129.5, 128.2, 128.2, 127.7, 127.6, 122.6, 116.0, 106.0, 90.3, 86.6, 64.4, 52.9, 46.3, 44.5, 43.2, 36.8, 34.4, 21.5 ppm. MS (ESI)  $m/z$  (%): 417.26  $[(\text{M} + \text{Na})^+, 100]$ . Anal. Calcd. for  $\text{C}_{23}\text{H}_{26}\text{N}_2\text{O}_2\text{S}$ : C, 70.02; H, 6.64; N, 7.10. Found: C, 70.42; H, 6.71; N, 7.00.

***N*-Allyl-*N*-(4-(phenylethynyl)-1-tosylpiperidin-4-yl)acetamide (35).** Compound **35** was obtained following the general procedure (B) using compound **34** (259 mg, 0.66 mmol), pyridine (1.32 mL, 1.66 mmol) and acetic anhydride (2.64 mL). The crude product was purified by flash chromatography with 3:1 hexane/EtOAc as eluent to give **35** (150 mg) as a yellow oil in 52% yield.  $^1\text{H}$  NMR (400 MHz,  $\text{CDCl}_3$ )  $\delta$  7.74 – 7.63 (m, 1H), 7.35 – 7.28 (m, 1H), 7.24 – 7.18 (m, 1H), 5.87 (ddt,  $J$  = 17.2, 10.4, 4.4 Hz, 1H), 5.29 (dd,  $J$  = 17.2, 0.9 Hz, 1H), 5.23 (dd,  $J$  = 10.5, 0.9 Hz, 1H), 4.14 (dt,  $J$  = 4.0, 1.8 Hz, 2H), 3.78 (d,  $J$  = 11.8 Hz, 2H), 2.77 (td,  $J$  = 12.3, 2.3 Hz, 2H), 2.62 – 2.52 (m, 2H), 2.41 (s, 3H), 2.24 – 2.18 (m, 2H), 2.13 (s, 3H) ppm.  $^{13}\text{C}$  NMR (100 MHz,  $\text{CDCl}_3$ )  $\delta$  171.5, 143.4, 134.7, 132.5, 131.1, 129.5, 128.3, 128.1, 127.9, 122.2, 116.5, 88.8, 87.9, 57.86, 49.1, 44.1, 33.9, 24.6, 21.5 ppm. MS (ESI)  $m/z$  (%): 437.17  $[(\text{M} + \text{H})^+, 100]$ . Anal. Calcd. for  $\text{C}_{25}\text{H}_{28}\text{N}_2\text{O}_3\text{S}$ : C, 68.78; H, 6.46; N, 6.42. Found: C, 69.00; H, 6.53; N, 6.37.

**(rac)-1-((3a'*R*,5'*S*)-5'-Hydroxy-6'-phenyl-3',3a',4',5'-tetrahydro-2'*H*-spiro[cyclohexane-1,1'-cyclopenta[*c*]pyrrol]-2'-yl)ethanone (36).** To a solution of **5** (50 mg, 0.162 mmol) in a 1:1 mixture

of MeOH/CH<sub>2</sub>Cl<sub>2</sub> (3.5 mL) were added successively CeCl<sub>3</sub>·7H<sub>2</sub>O (120 mg, 0.32 mmol) and NaBH<sub>4</sub> (12 mg, 0.32 mmol). The reaction mixture was left stirring at room temperature for 1 h, then the reaction was quenched with satd. NH<sub>4</sub>Cl (4 mL) and 1M HCl (1 mL). The reaction mixture was partitioned between EtOAc and water, and the aqueous layer was extracted three times with EtOAc. The combined organic layer was washed with brine, dried over Na<sub>2</sub>SO<sub>4</sub> and concentrated under reduced pressure. The crude product was purified by flash silica gel chromatography (2:1 EtOAc/petrol ether) to give **36** (46 mg, 92% yield) as a pale yellow oil. <sup>1</sup>H NMR (400 MHz, CDCl<sub>3</sub>) δ 7.41 – 7.26 (m, 3H), 7.21 – 7.13 (m, 2H), 5.10 (t, *J* = 7.1 Hz, 1H), 3.79 (t, *J* = 8.8 Hz, 1H), 3.32 – 3.16 (m, 1H), 3.09 (t, *J* = 9.8 Hz, 1H), 2.95 (td, *J* = 13.5, 5.6 Hz, 1H), 2.65 (dt, *J* = 12.7, 7.1 Hz, 1H), 2.60 – 2.47 (m, 1H), 2.02 (s, 3H), 1.98 – 1.54 (m, 2H), 1.52 – 1.37 (m, 4H), 1.14 – 1.02 (m, 4H). <sup>13</sup>C NMR (100 MHz, CDCl<sub>3</sub>) δ 168.8, 148.3, 137.3, 136.5, 129.5, 128.2, 127.4, 84.9, 66.6, 54.5, 43.9, 37.7, 32.6, 28.8, 25.4, 24.3, 23.4, 22.1. MS (ESI) *m/z* (%): 334.27 (100, [M + Na]<sup>+</sup>). Anal. Calcd. for C<sub>20</sub>H<sub>25</sub>NO<sub>2</sub>: C, 77.14; H, 3.09; N, 4.50. Found: C, 77.50; H, 3.21; N, 4.39.

**(rac)- 1-((1a'S,2'S,3a'S,6a'S)-2'-Hydroxy-1a'-phenyltetrahydrospiro[cyclohexane-1,6'-oxireno[2',3':1,5]cyclopenta[1,2-*c*]pyrrol]-5'(1a'H)-yl)ethanone (37).** To a solution of compound **36** (43 mg, 0.154 mmol) in anhydrous CH<sub>2</sub>Cl<sub>2</sub> (1 mL) mCPBA (34 mg, 80%, 0.154 mmol) was added at 0 °C, and the reaction mixture was stirred at 0 °C for 3 h. The reaction was quenched with satd. NaHCO<sub>3</sub> (2 mL) and the resulting mixture was partitioned between EtOAc and water. The aqueous layer was extracted three times with EtOAc, washed with brine (20 mL), dried over Na<sub>2</sub>SO<sub>4</sub> and concentrated under reduced pressure. The crude product was purified by flash silica gel chromatography (1:1 EtOAc/petrol ether) to give pure **37** (34 mg, 68% yield) as a colorless oil. <sup>1</sup>H NMR (400 MHz, CDCl<sub>3</sub>) δ 7.44 – 7.32 (m, 5H), 4.59 (t, *J* = 7.7 Hz, 1H), 3.69 (t, *J* = 8.5 Hz, 1H), 3.36 – 3.25 (m, 1H), 2.79 – 2.69 (m, 1H), 2.67 – 2.54 (m, 1H), 2.07 – 2.01 (m, 1H), 2.04 (s, 3H), 1.76 – 1.42 (m, 4H), 1.35 – 1.03 (m, 7H). <sup>13</sup>C NMR (100 MHz, CDCl<sub>3</sub>) δ 169.1, 133.5, 128.5 (2C), 128.4, 127.8 (2C), 83.7, 80.0, 73.7, 66.4, 49.9, 38.5, 30.9, 28.1, 26.0, 25.3, 23.9, 23.0,



21.9. MS (ESI)  $m/z$  (%): 350.34 (100,  $[M + Na]^+$ ). Anal. Calcd. for  $C_{20}H_{25}NO_3$ : C, 73.37; H, 7.70; N, 4.28. Found: C, 73.78; H, 7.79; N, 4.20.

**(rac)-1-((3a'*R*,5'*S*)-5'-Ethyl-5'-hydroxy-6'-phenyl-3',3a',4',5'-tetrahydro-2'*H*-spiro[cyclohexane-1,1'-cyclopenta[*c*]pyrrol]-2'-yl)ethanone (38).**  $CeCl_3$  (40 mg, 0.162 mmol) was dried under vacuum and transferred under a nitrogen atmosphere to a round bottom flask. Then, a solution of compound **5** (50 mg, 0.162 mmol) in THF (1 mL) was added and stirred at room temperature for 1 h. The mixture was cooled to 0 °C before adding dropwise the Grignard reagent as a 3 M solution in  $Et_2O$  (300  $\mu$ L, 0.810 mmol). The resulting mixture was left stirring at 0 °C for 30 min, then quenched by carefully adding a saturated solution of  $NH_4Cl$  (1 mL). The solution was left under stirring for 30 min before pouring a saturated solution of  $NH_4Cl$  (15 mL). Then, the resulting mixture was extracted with  $Et_2O$ , washed with water and brine, dried over  $Na_2SO_4$  and concentrated under reduced pressure. The crude product was purified by flash silica gel chromatography (1:1  $EtOAc$ /petrol ether) to give **38** (26 mg, 48% yield) as a yellow oil.  $^1H$  NMR (400 MHz,  $CDCl_3$ )  $\delta$  7.36 – 7.33 (m, 3H), 7.19 – 7.16 (m, 2H), 3.78 (t,  $J$  = 8.7 Hz, 1H), 3.24 – 3.12 (m, 1H), 3.06 (t,  $J$  = 9.6 Hz, 1H), 2.89 (td,  $J$  = 13.2, 5.6 Hz, 1H), 2.57 (dt,  $J$  = 12.7, 5.1 Hz, 1H), 2.45 (dd,  $J$  = 13.0, 7.3 Hz, 1H), 2.03 (s, 3H), 1.75 – 1.61 (m, 4H), 1.58 – 1.40 (m, 4H), 1.36 – 1.25 (m, 4H), 1.00 (t,  $J$  = 7.4 Hz, 3H).  $^{13}C$  NMR (100 MHz,  $CDCl_3$ )  $\delta$  168.6, 148.9, 137.5, 135.5, 127.9, 127.5, 92.4, 66.6, 54.8, 43.8, 40.5, 32.6, 31.9, 28.6, 25.4, 24.2, 23.4, 21.7, 8.53. MS (ESI)  $m/z$  (%): 362.28 (100,  $[M + Na]^+$ ). Anal. Calcd. for  $C_{22}H_{29}NO_2$ : C, 77.84; H, 8.61; N, 4.13. Found: C, 78.12; H, 8.70; N, 4.05.

**(rac)-2'-Acetyl-7'-phenyl-3',3a',4',5'-tetrahydrospiro[cyclohexane-1,1'-pyrrolo[3,4-*c*]pyridin]-6'(2'*H*)-one (39).** To a stirred solution of compound **5** (50 mg, 0.162 mmol) in TFA (600  $\mu$ L) was added  $NaN_3$  (19 mg, 0.29 mmol) and the reaction mixture was heated at reflux temperature for 16 h. After completing the reaction, the mixture was cooled to room temperature and evaporated under reduced pressure. The resulting crude was treated with water and extracted with  $CH_2Cl_2$ . The

combined organic phase was successively washed with satd.  $\text{NaHCO}_3$ , water, and brine, then dried over  $\text{Na}_2\text{SO}_4$  and concentrated under reduced pressure. The crude product was purified by flash silica gel chromatography (EtOAc) to give pure **39** (22 mg, 0.067 mmol, 41%) as a colorless oil.  $^1\text{H}$  NMR (400 MHz,  $\text{CDCl}_3$ )  $\delta$  7.35 – 7.25 (m, 5H), 5.56 (br s, 1H), 3.83 – 3.67 (m, 1H), 3.40 (d,  $J$  = 4.4 Hz, 1H), 3.17 – 3.00 (m, 1H), 2.70 (dd,  $J$  = 18.7, 6.9 Hz, 1H), 2.34 (d,  $J$  = 18.7 Hz, 1H), 2.12 – 2.02 (m, 2H), 1.98 (s, 3H), 1.83 – 1.56 (m, 8H).  $^{13}\text{C}$  NMR (100 MHz,  $\text{CDCl}_3$ )  $\delta$  172.2, 165.2, 133.6, 132.5, 132.0, 129.0, 128.0, 127.8, 59.6, 42.7, 40.2, 39.4, 27.5, 25.7, 23.3, 22.4, 21.6. MS (ESI)  $m/z$  (%): 347.25 (100,  $[\text{M} + \text{Na}]^+$ ). Anal. Calcd. for  $\text{C}_{20}\text{H}_{24}\text{N}_2\text{O}_2$ : C, 74.04; H, 7.46; N, 3.64. Found: C, 74.56; H, 7.53; N, 3.57.

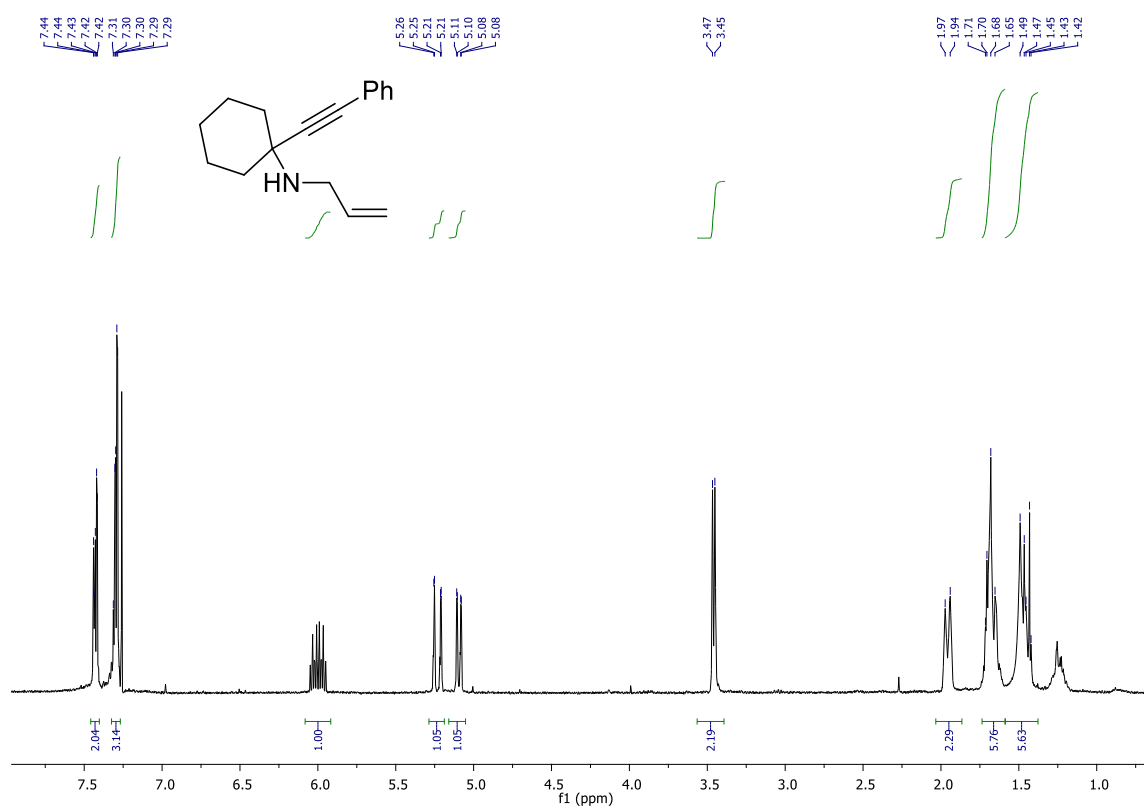

Figure S1. <sup>1</sup>H NMR spectrum of compound **3** (400 MHz, CDCl<sub>3</sub>).

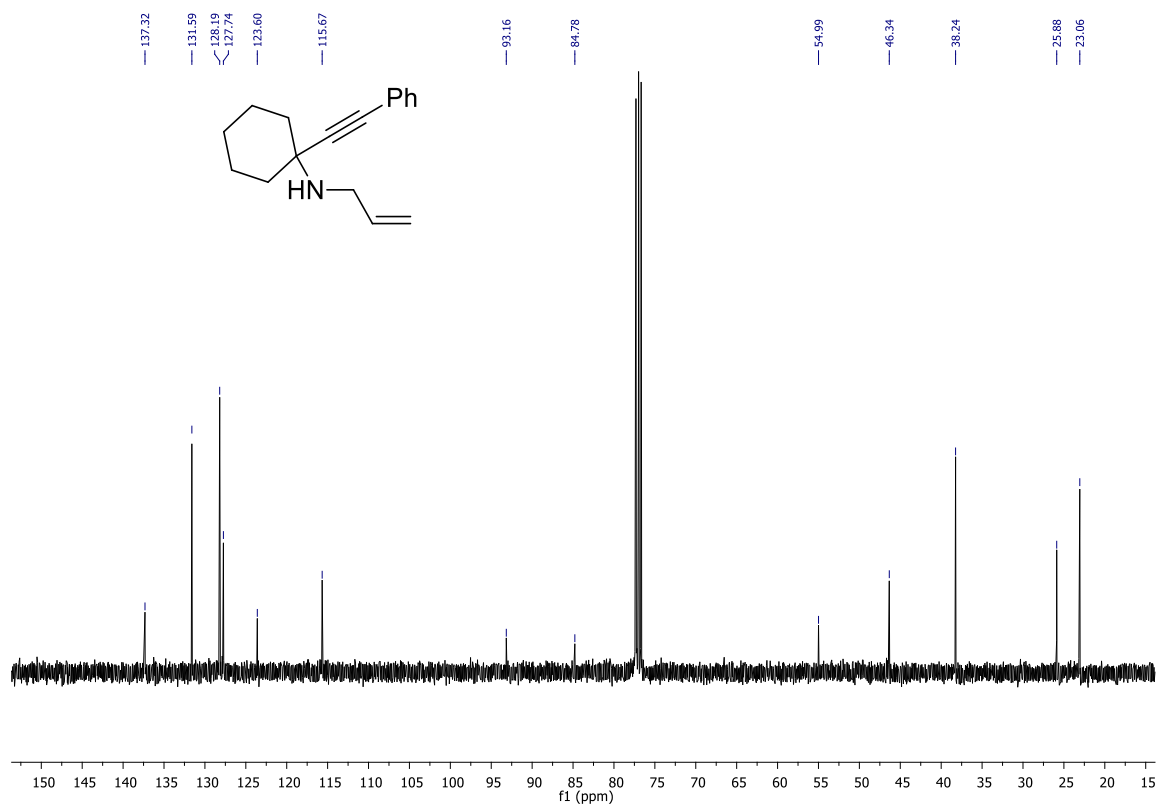

Figure S2. <sup>13</sup>C NMR spectrum of compound **3** (100 MHz, CDCl<sub>3</sub>).

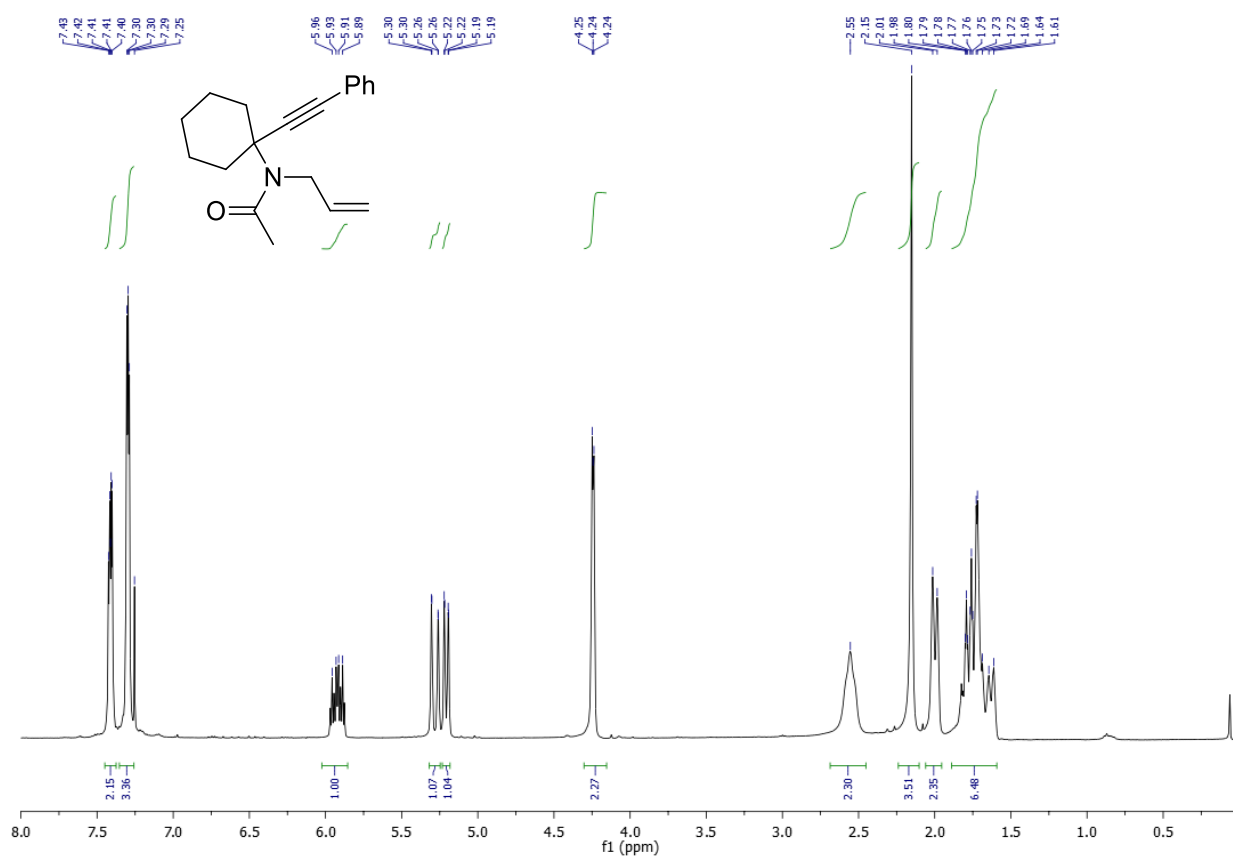

Figure S3. <sup>1</sup>H NMR spectrum of compound **4** (400 MHz, CDCl<sub>3</sub>).

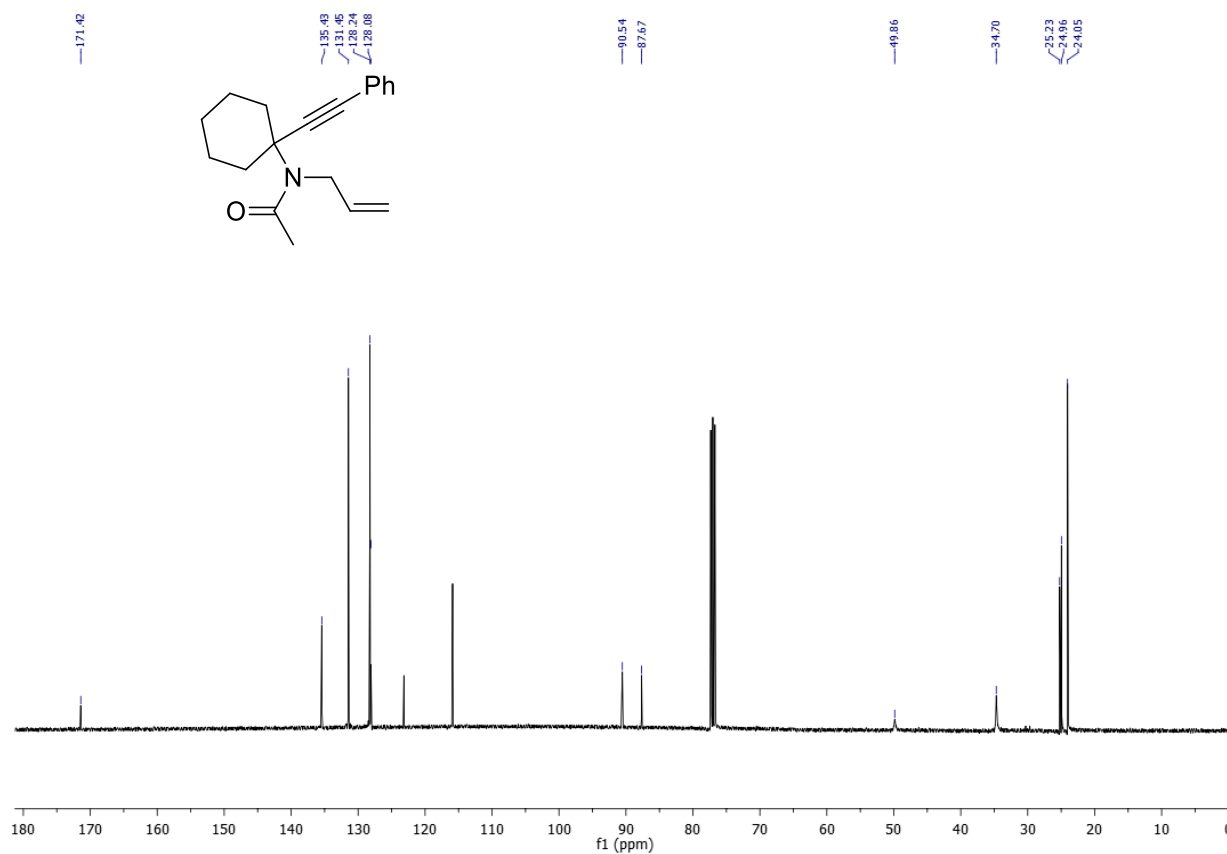

Figure S4. <sup>13</sup>C NMR spectrum of compound **4** (100 MHz, CDCl<sub>3</sub>).

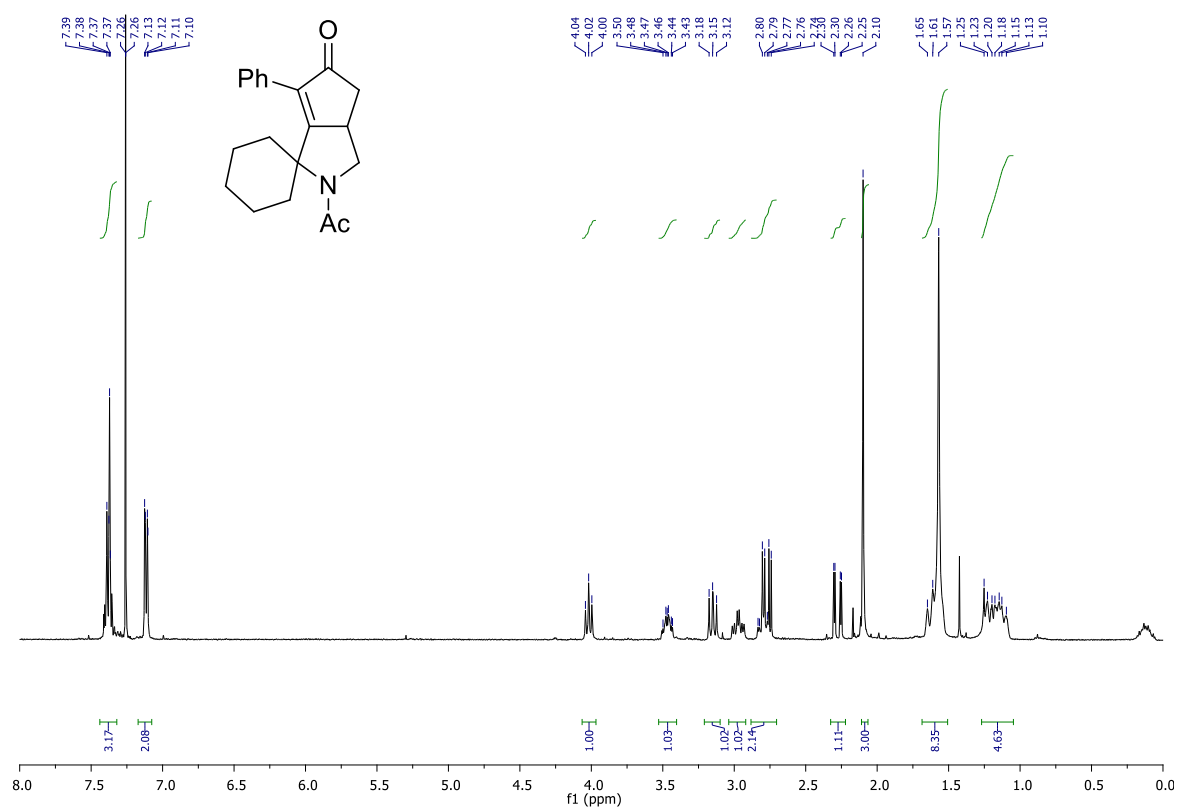

Figure S5. <sup>1</sup>H NMR spectrum of compound **5** (400 MHz, CDCl<sub>3</sub>).

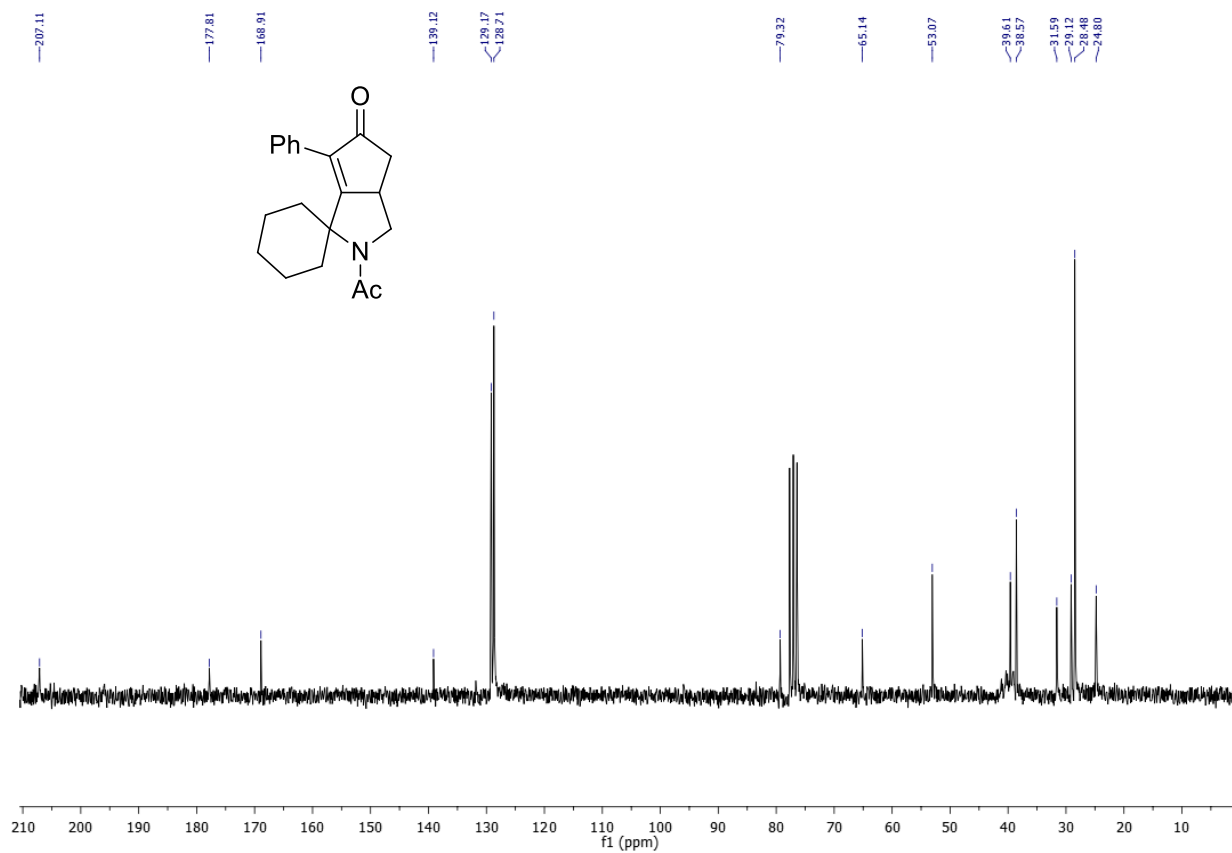

Figure S6. <sup>13</sup>C NMR spectrum of compound **5** (50 MHz, CDCl<sub>3</sub>).

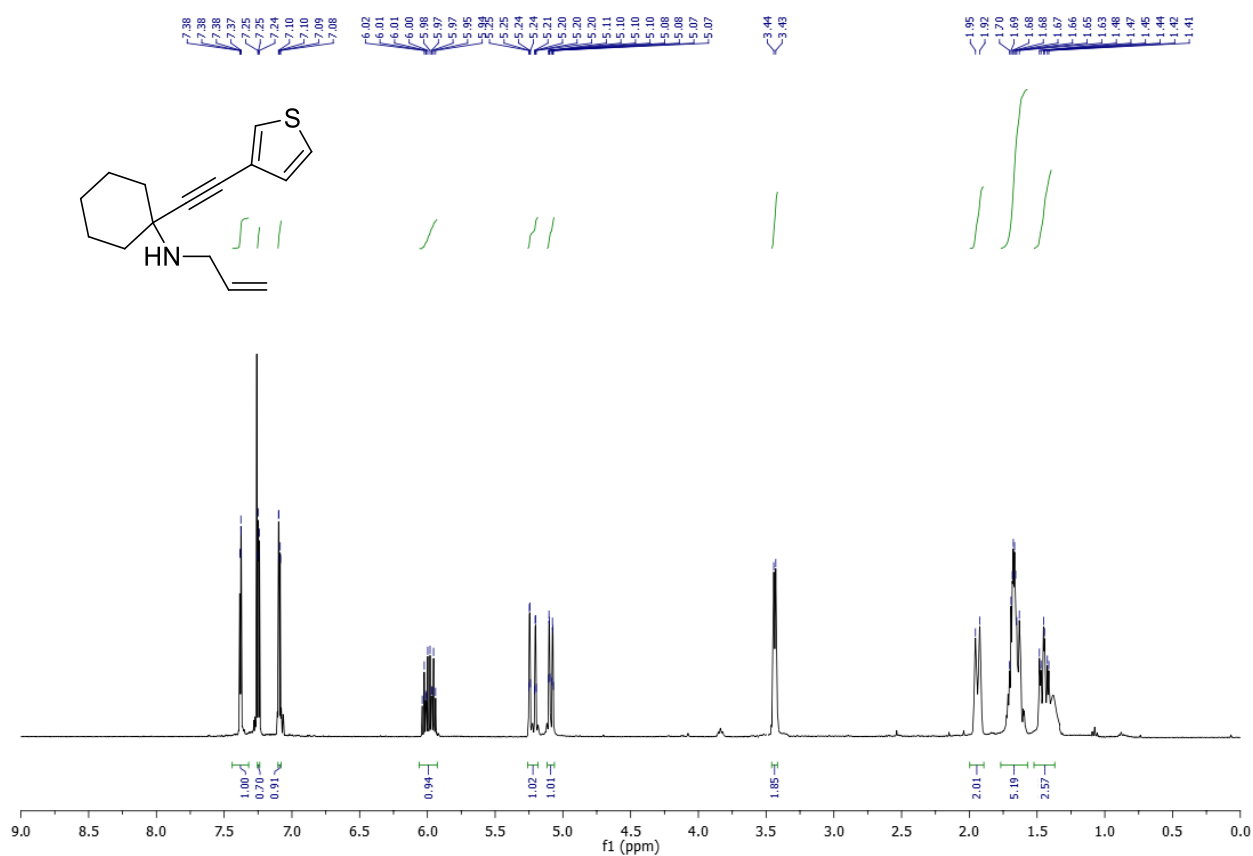

Figure S7. <sup>1</sup>H NMR spectrum of compound **7** (400 MHz, CDCl<sub>3</sub>).

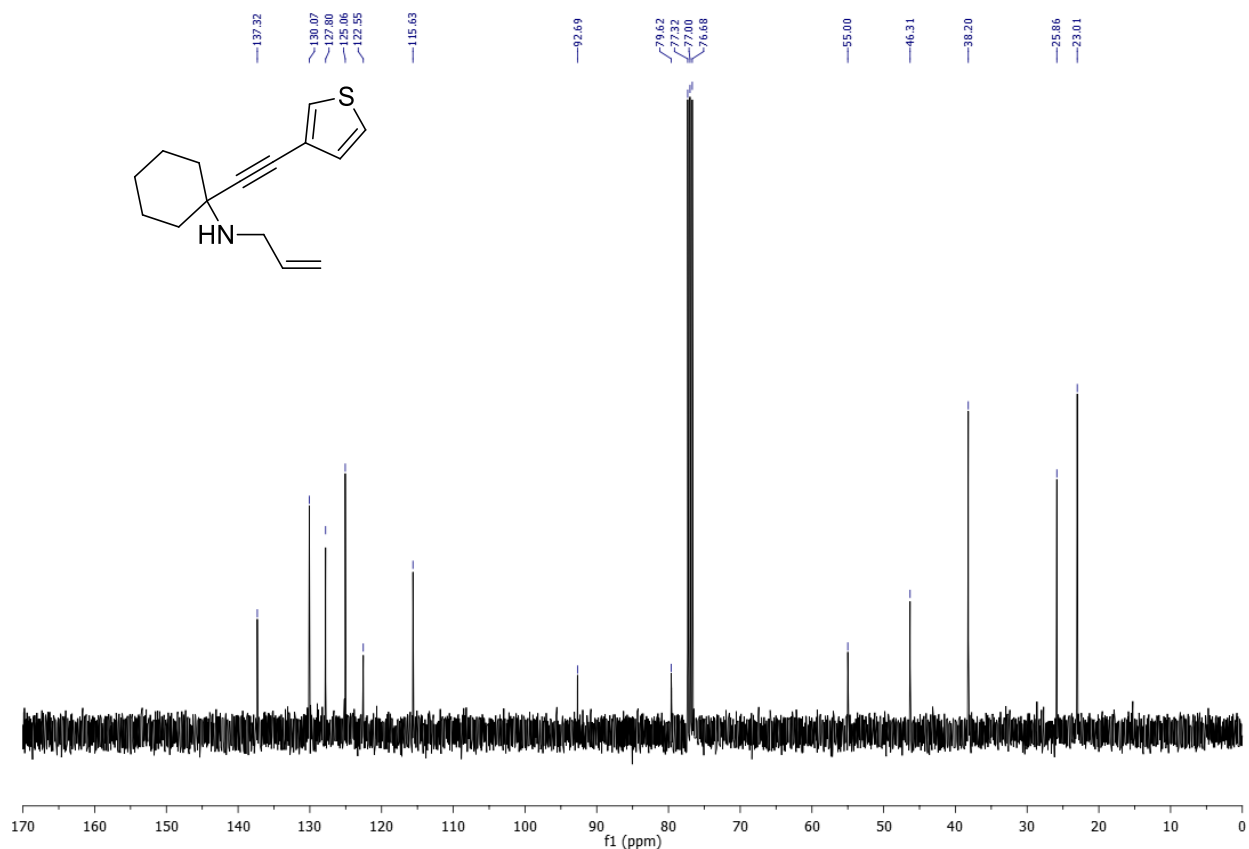

Figure S8. <sup>13</sup>C NMR spectrum of compound **7** (100 MHz, CDCl<sub>3</sub>).

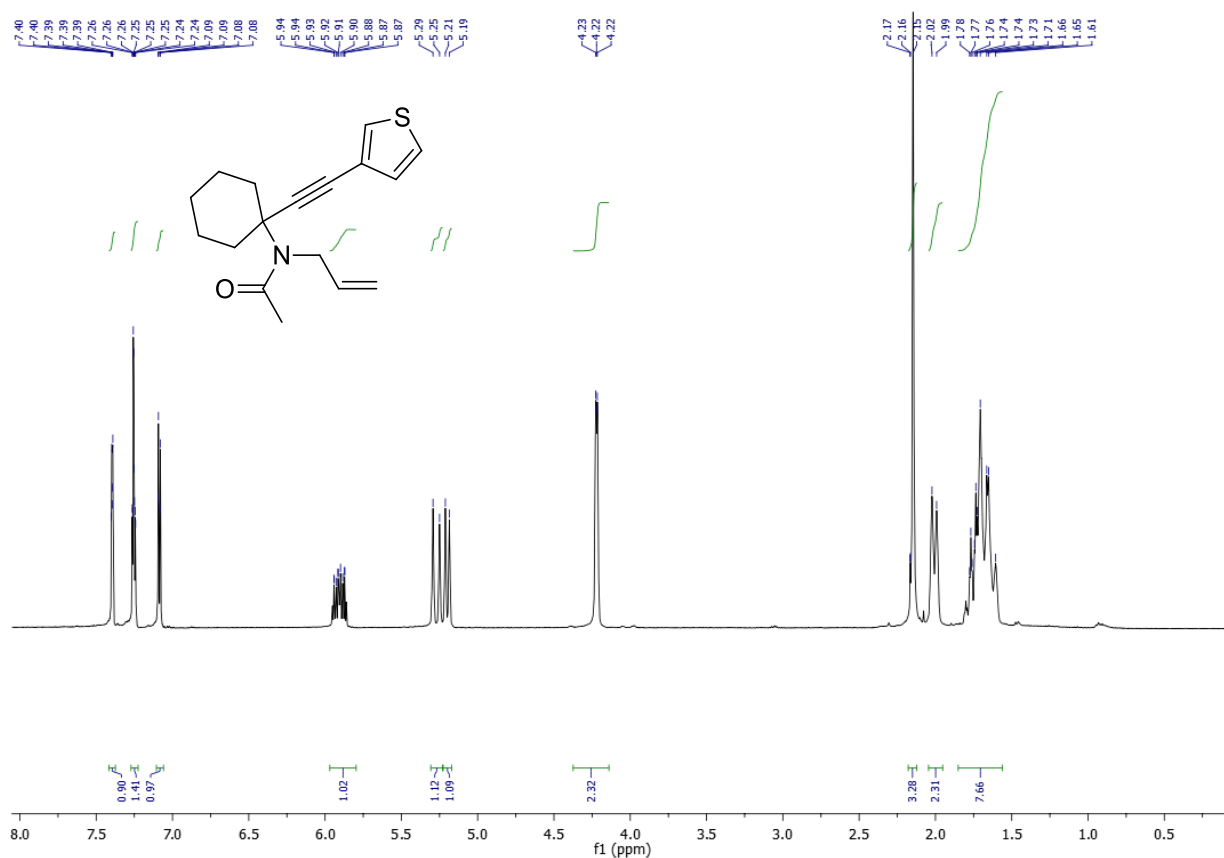

Figure S9. <sup>1</sup>H NMR spectrum of compound **8** (400 MHz, CDCl<sub>3</sub>).

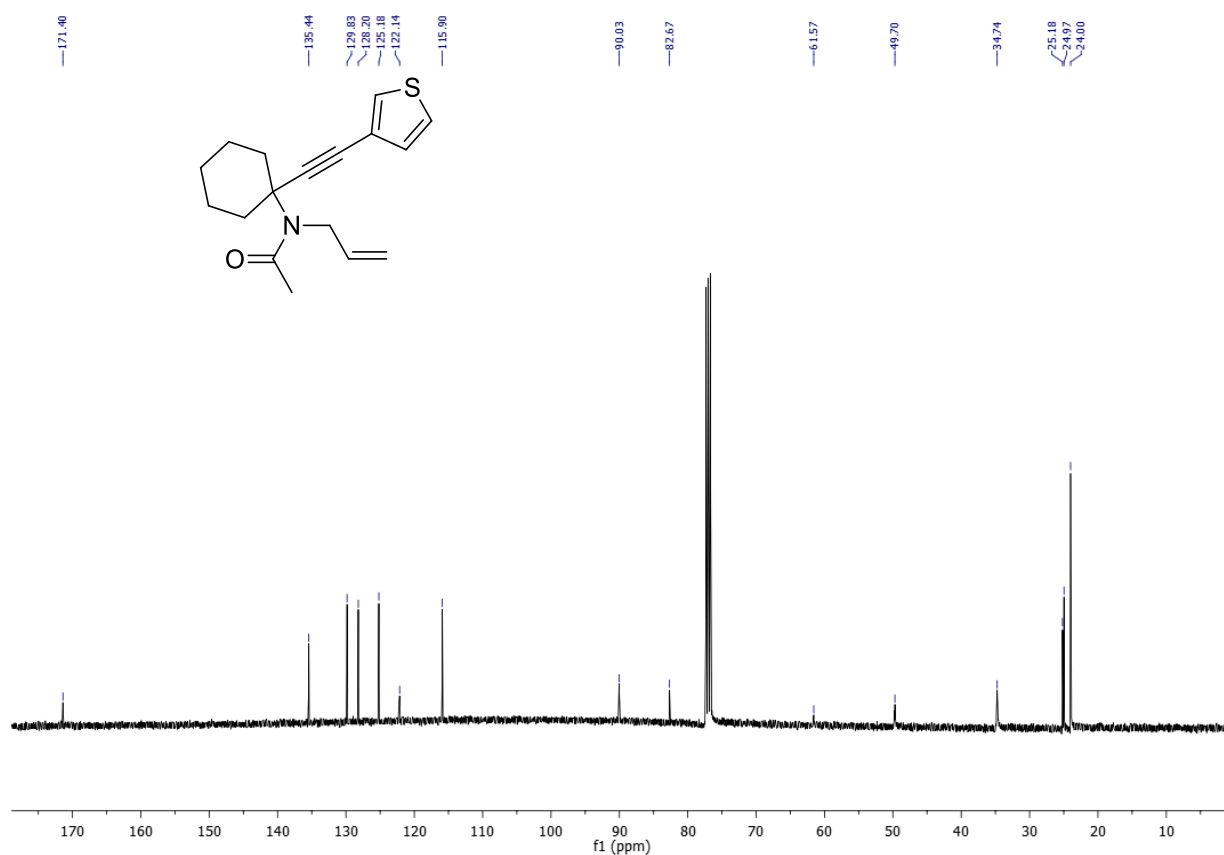

Figure S10. <sup>13</sup>C NMR spectrum of compound **8** (100 MHz, CDCl<sub>3</sub>).

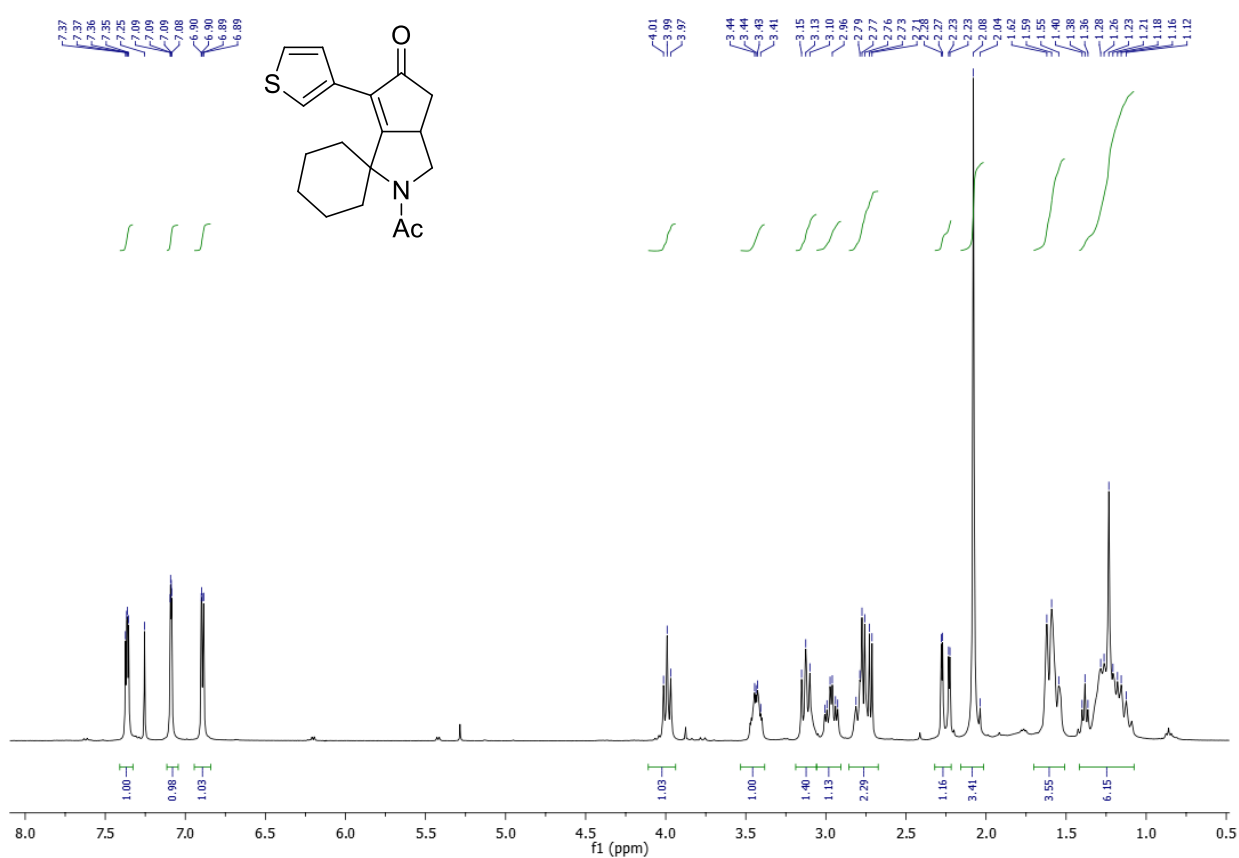

Figure S11. <sup>1</sup>H NMR spectrum of compound **9** (400 MHz, CDCl<sub>3</sub>).

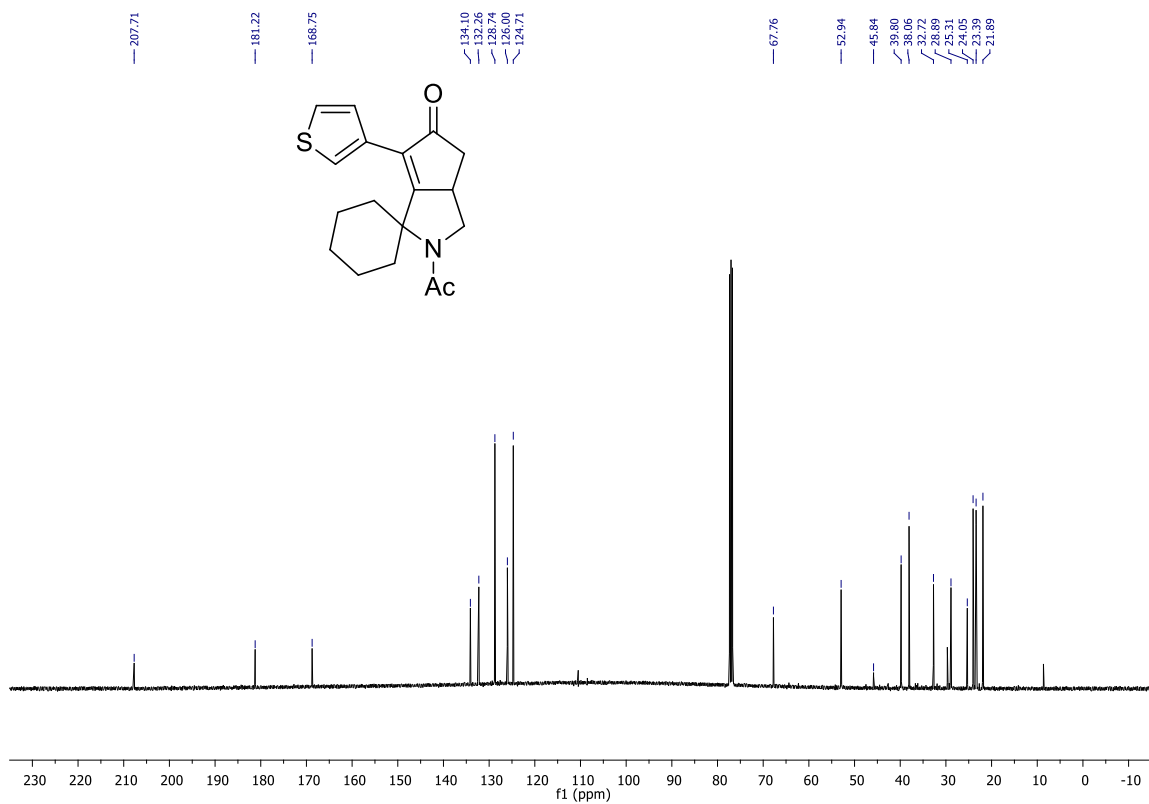

Figure S12. <sup>13</sup>C NMR spectrum of compound **9** (100 MHz, CDCl<sub>3</sub>).



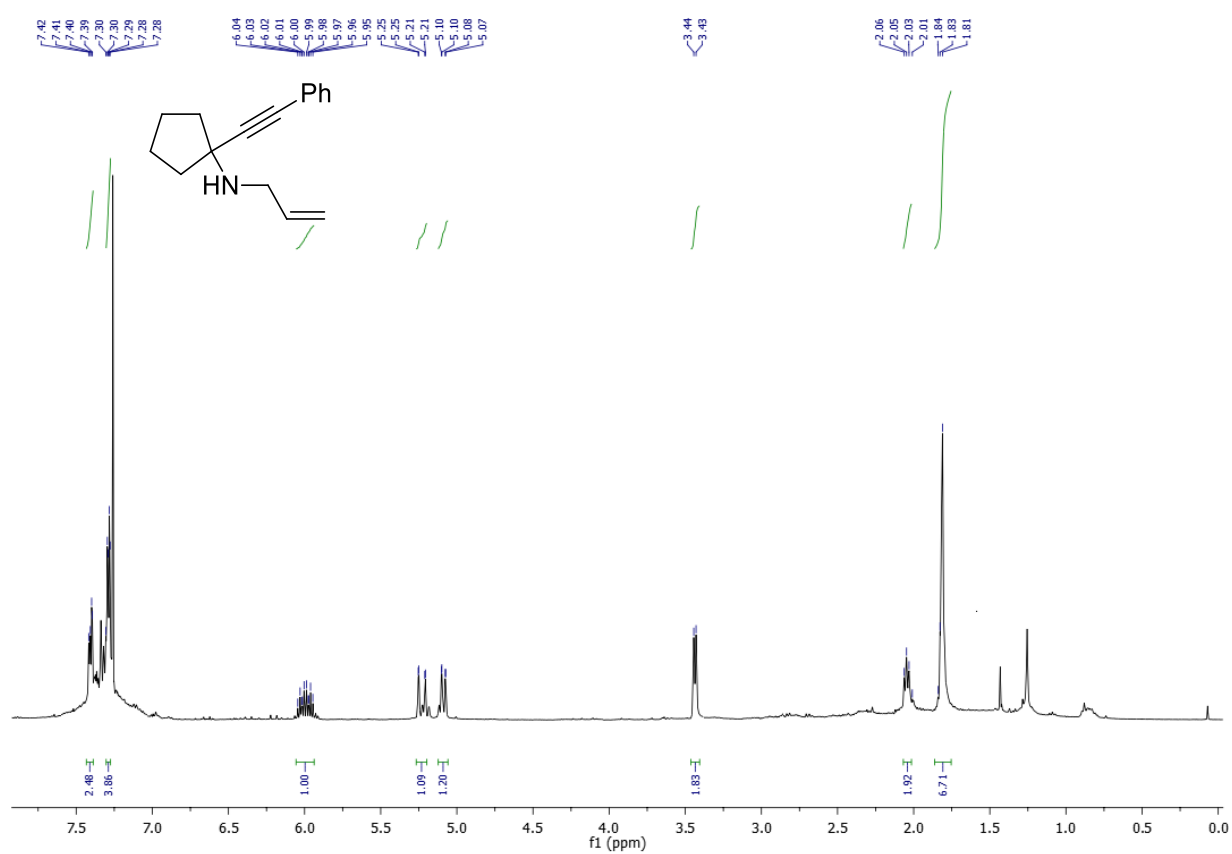

Figure S13. <sup>1</sup>H NMR spectrum of compound **13** (400 MHz, CDCl<sub>3</sub>).

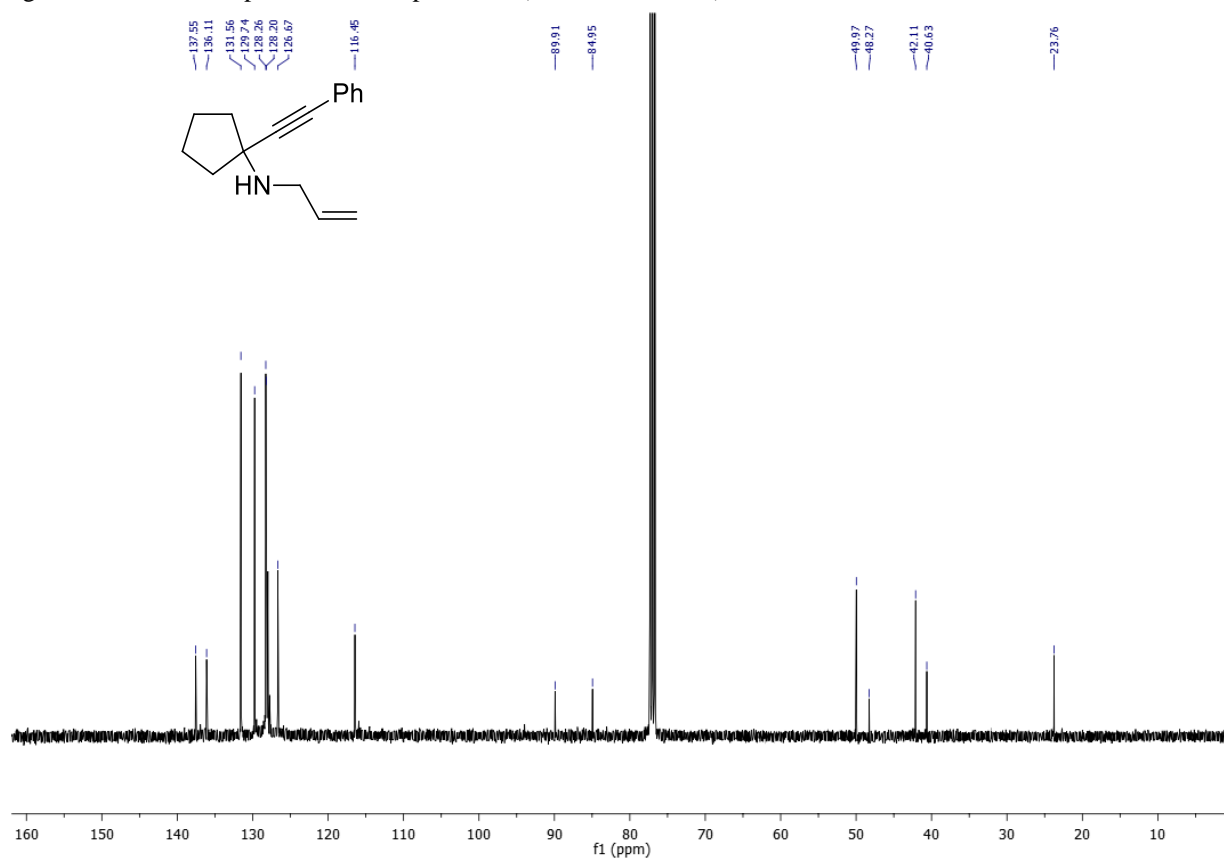

Figure S14. <sup>13</sup>C NMR spectrum of compound **13** (100 MHz, CDCl<sub>3</sub>).

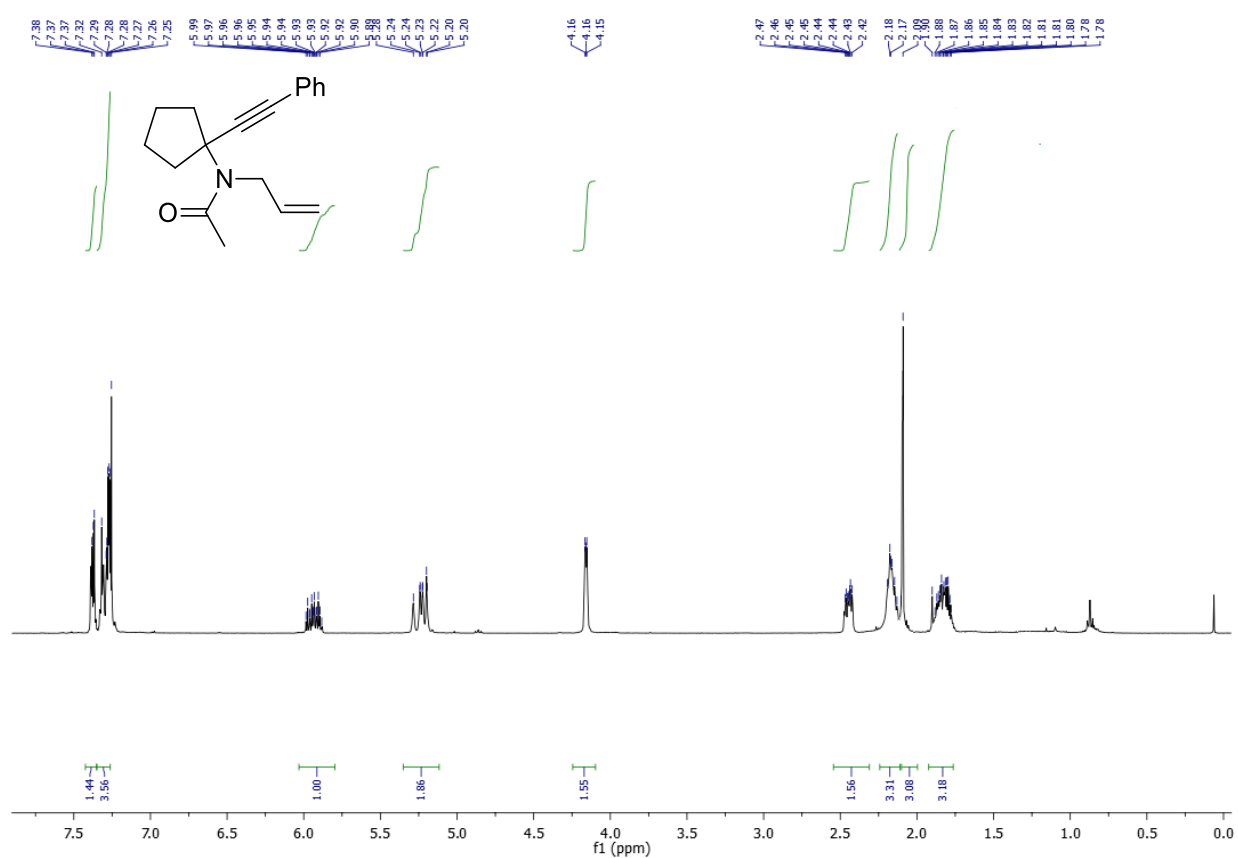

Figure S15. <sup>1</sup>H NMR spectrum of compound **14** (400 MHz, CDCl<sub>3</sub>).

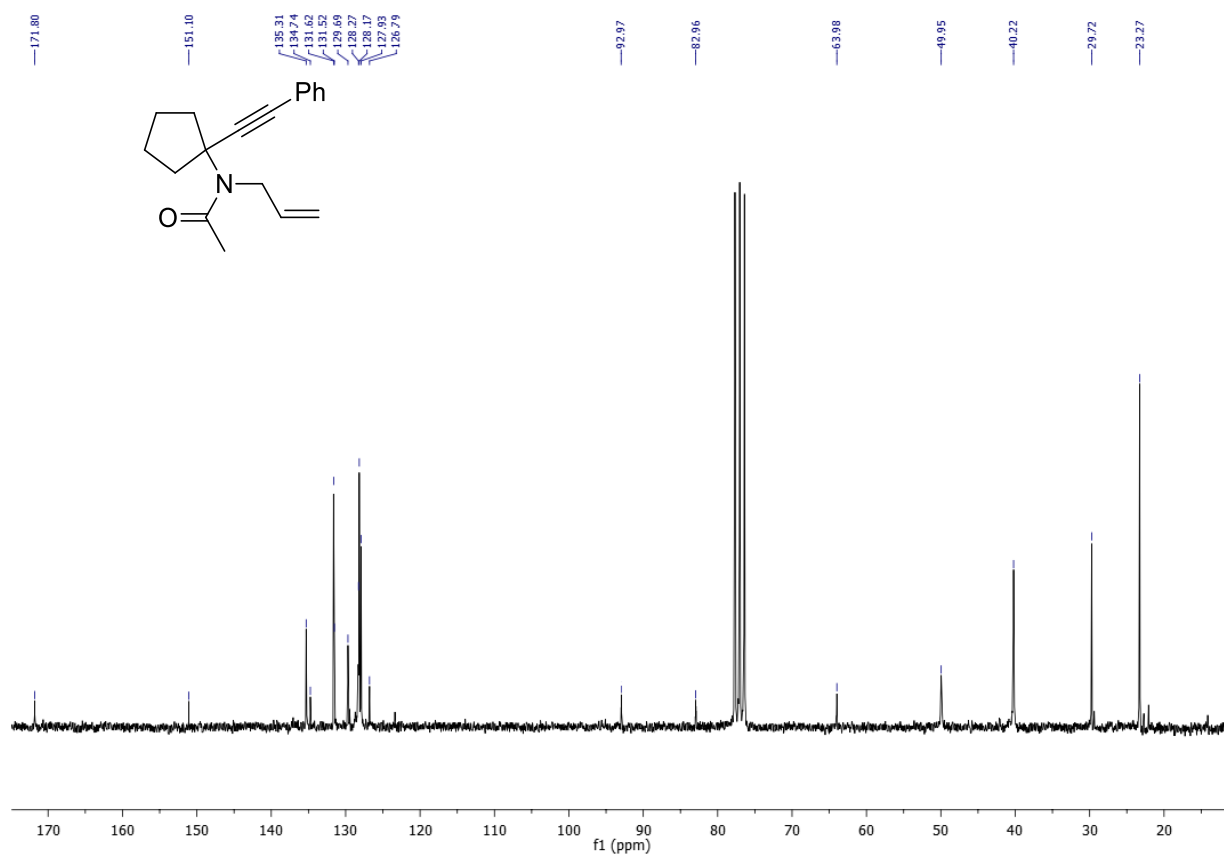

Figure S16. <sup>13</sup>C NMR spectrum of compound **14** (50 MHz, CDCl<sub>3</sub>).

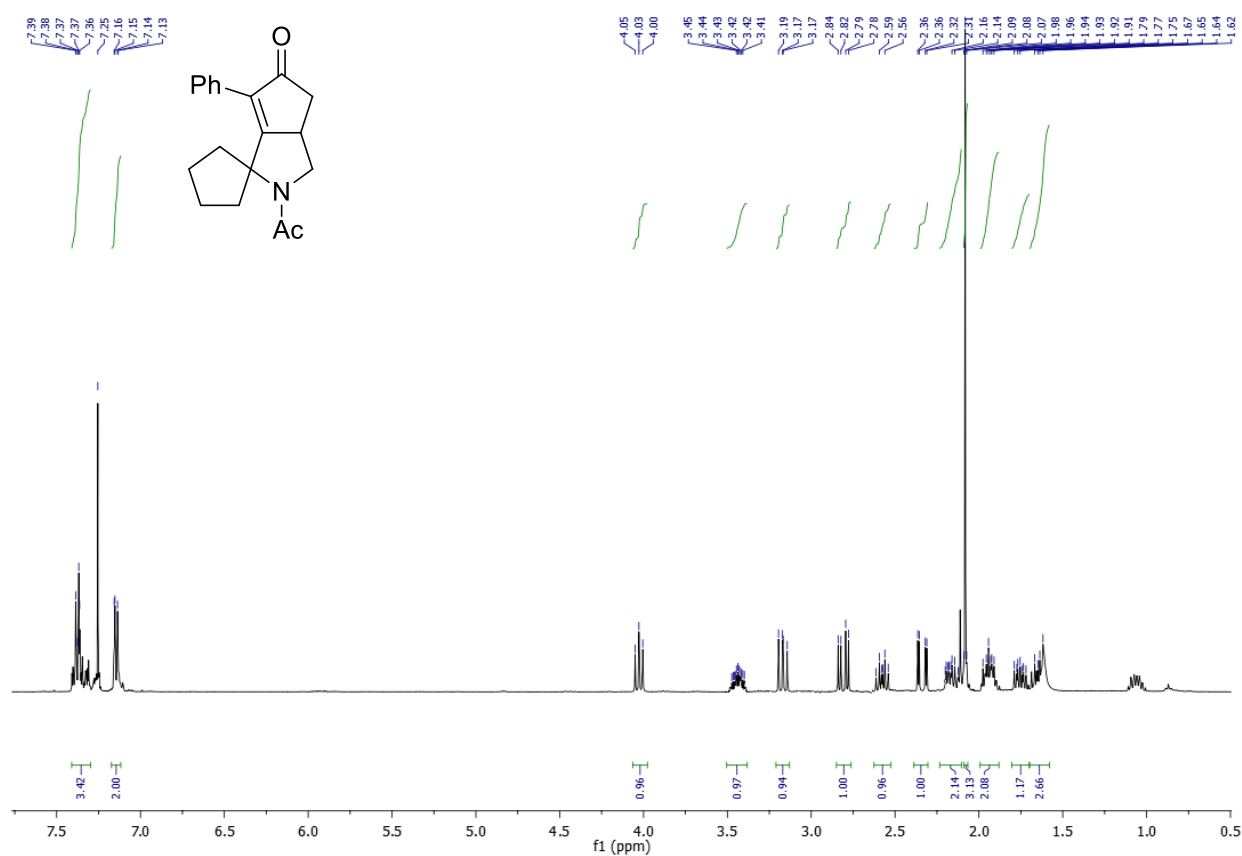

Figure S17. <sup>1</sup>H NMR spectrum of compound **15** (400 MHz, CDCl<sub>3</sub>).

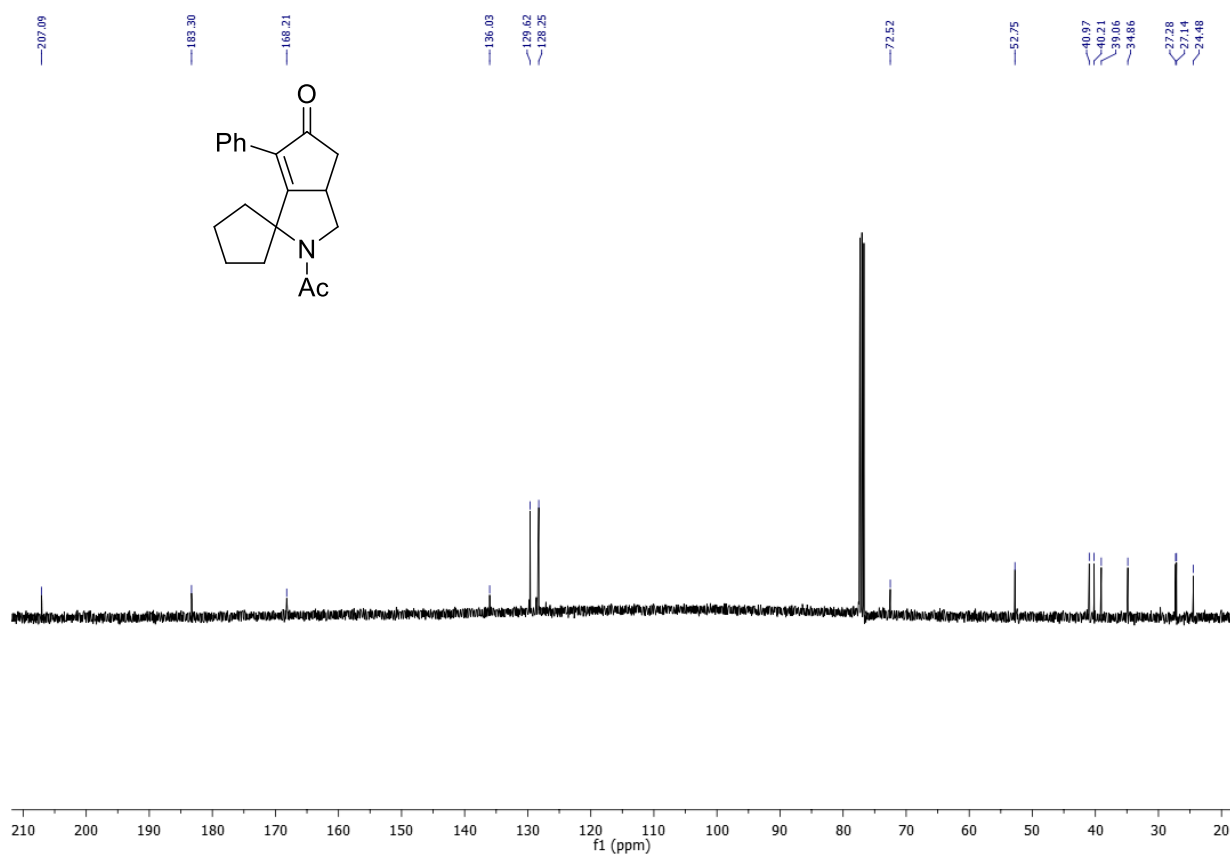

Figure S18. <sup>13</sup>C NMR spectrum of compound **15** (100 MHz, CDCl<sub>3</sub>).

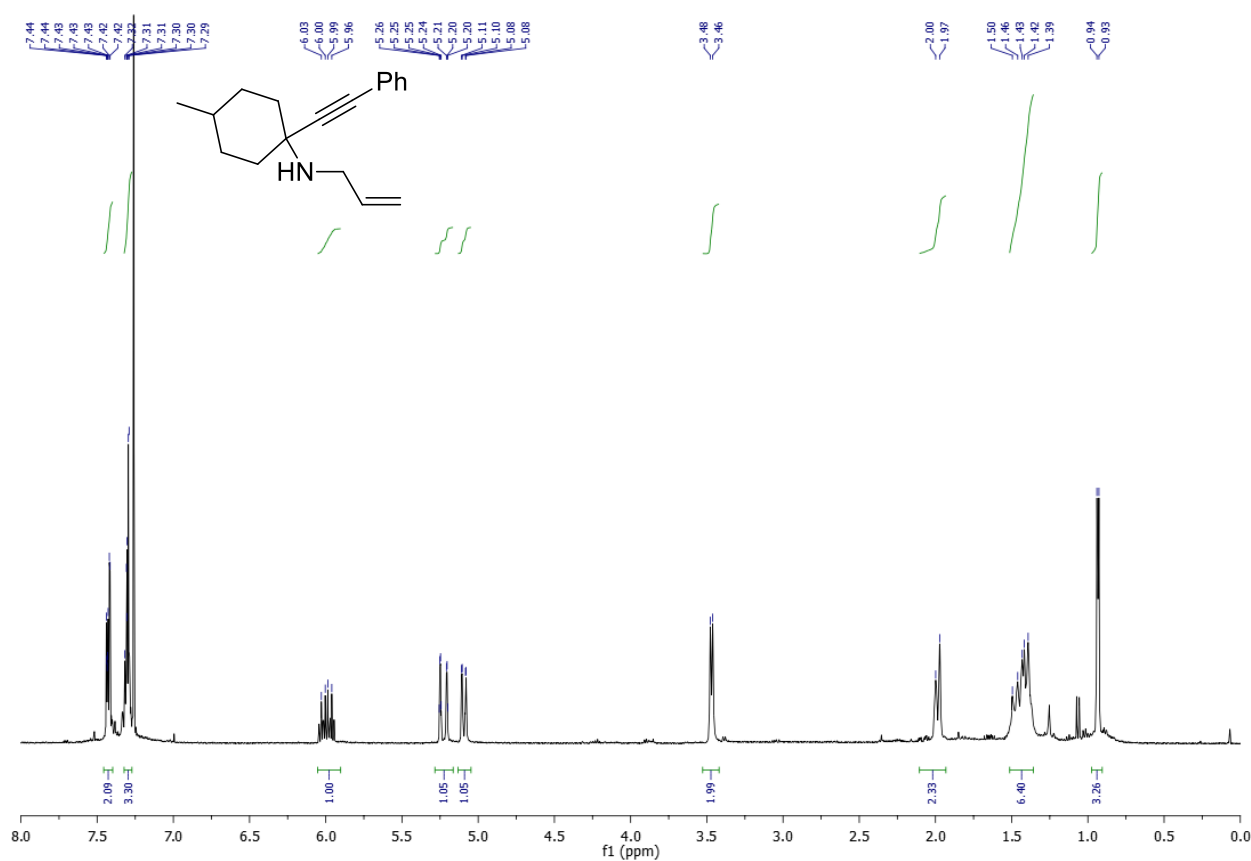

Figure S19. <sup>1</sup>H NMR spectrum of compound **17** (400 MHz, CDCl<sub>3</sub>).

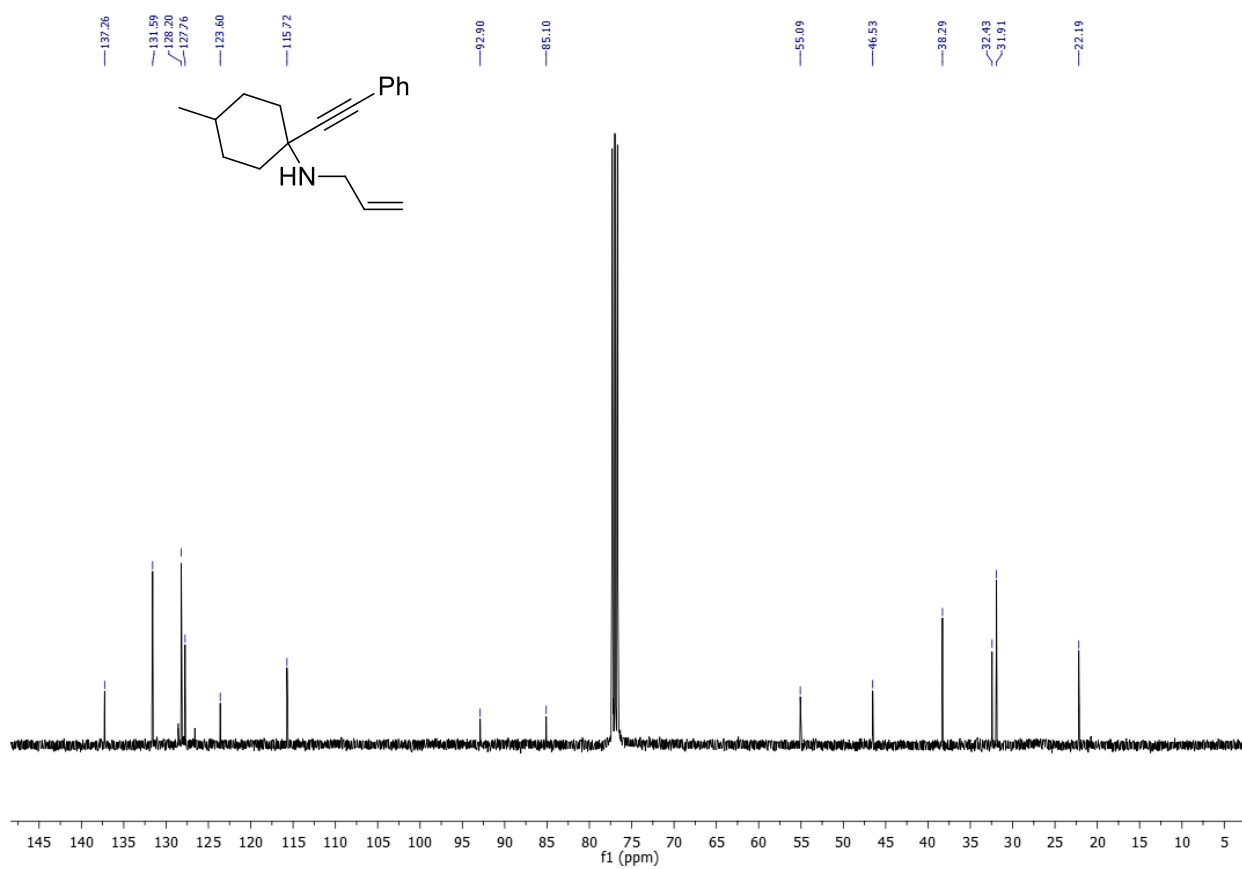

Figure S20. <sup>13</sup>C NMR spectrum of compound **17** (100 MHz, CDCl<sub>3</sub>).

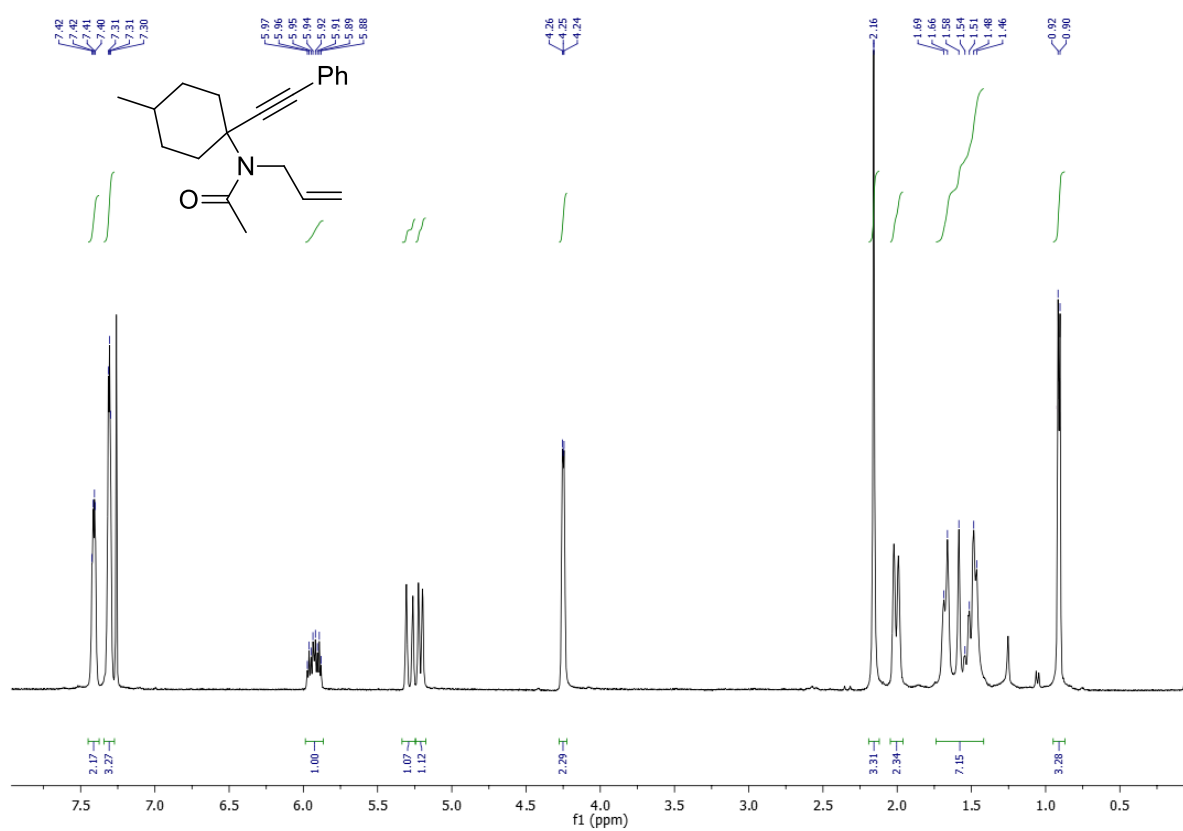

Figure S21. <sup>1</sup>H NMR spectrum of compound **18** (400 MHz, CDCl<sub>3</sub>).

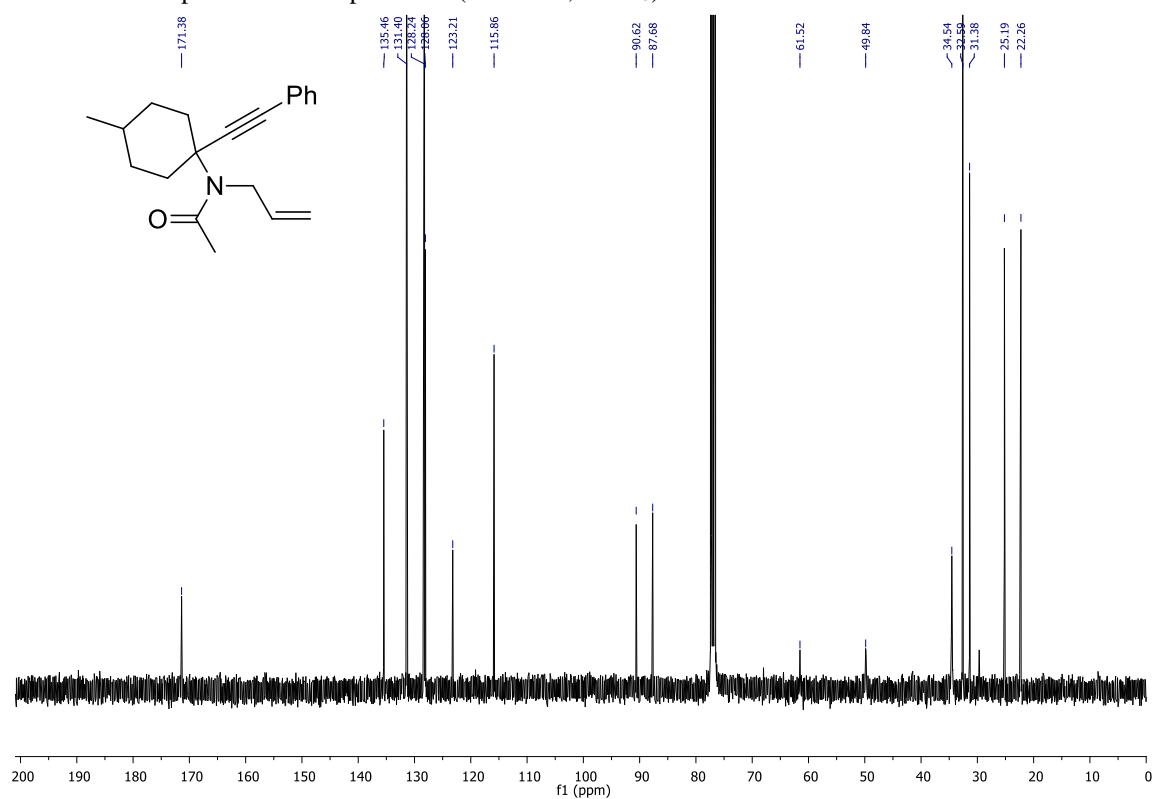

Figure S22. <sup>13</sup>C NMR spectrum of compound **18** (100 MHz, CDCl<sub>3</sub>).

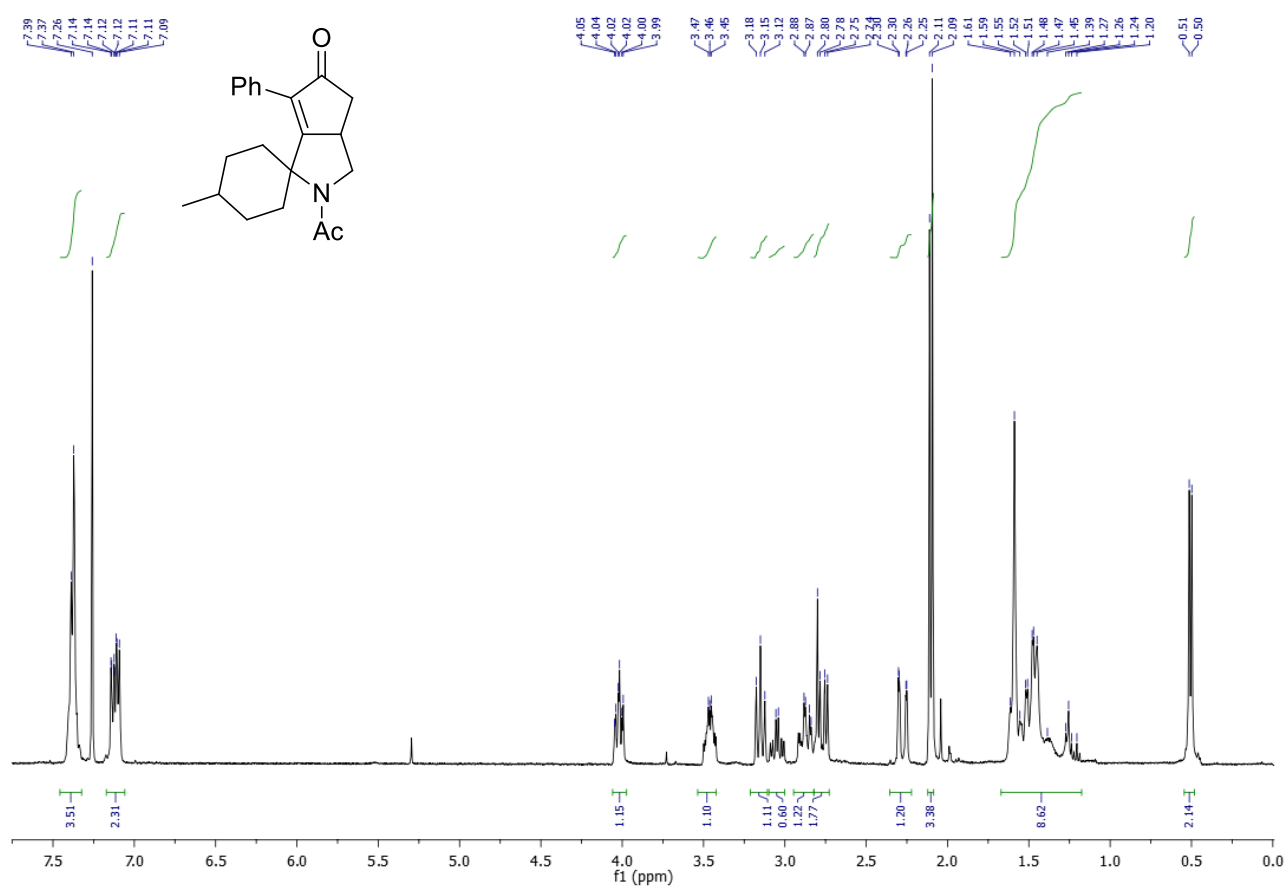

Figure S23. <sup>1</sup>H NMR spectrum of compound **19** (400 MHz, CDCl<sub>3</sub>).

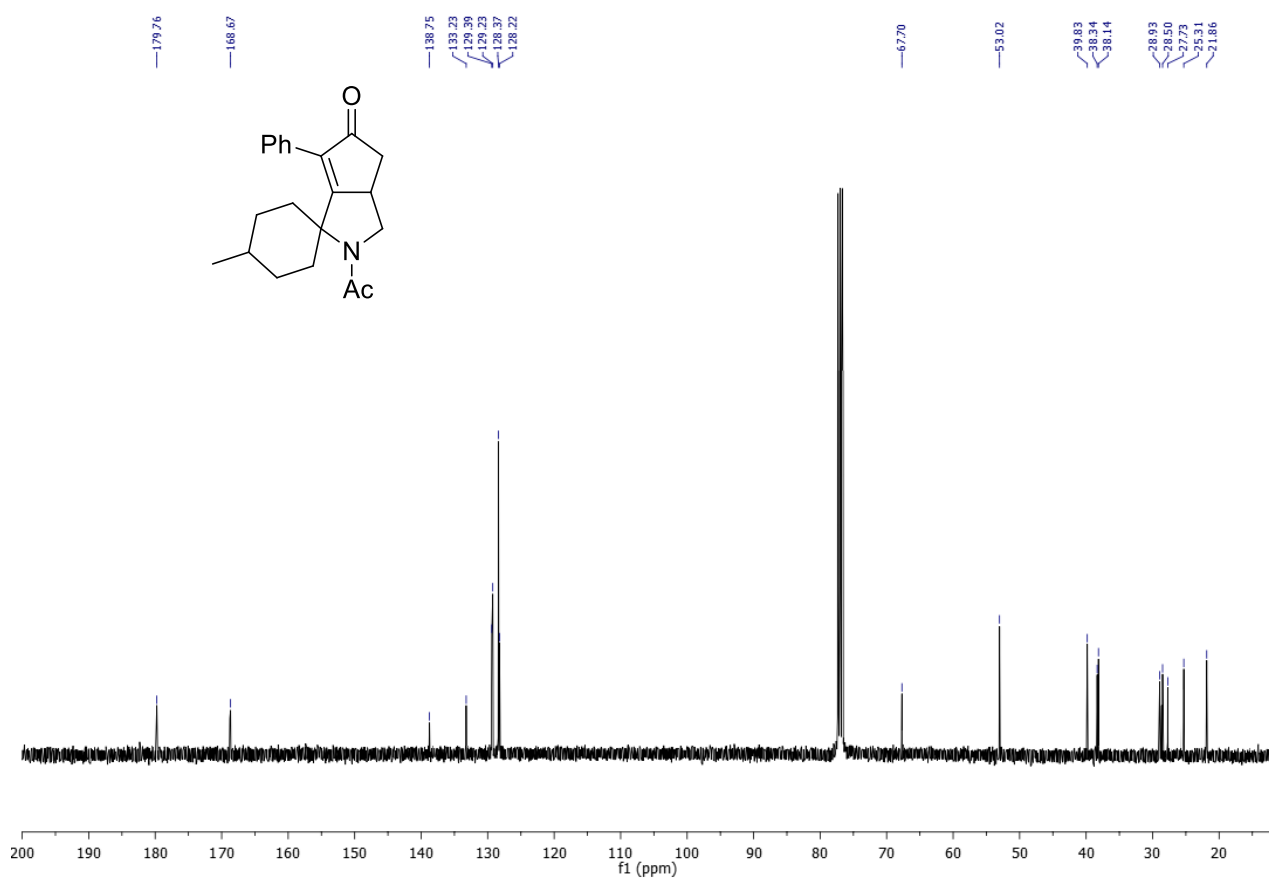

Figure S24. <sup>13</sup>C NMR spectrum of compound **19** (100 MHz, CDCl<sub>3</sub>).

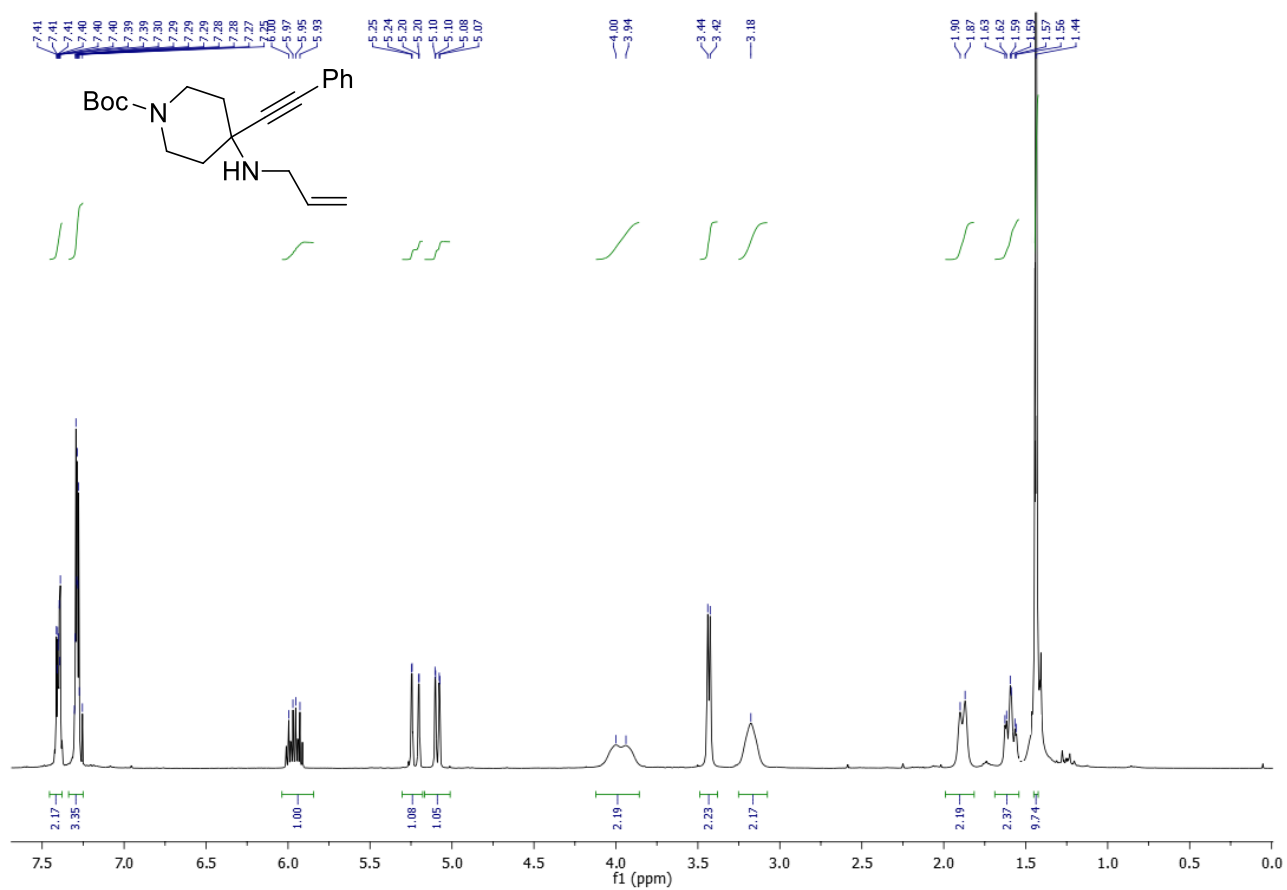

Figure S25. <sup>1</sup>H NMR spectrum of compound **24** (400 MHz, CDCl<sub>3</sub>).

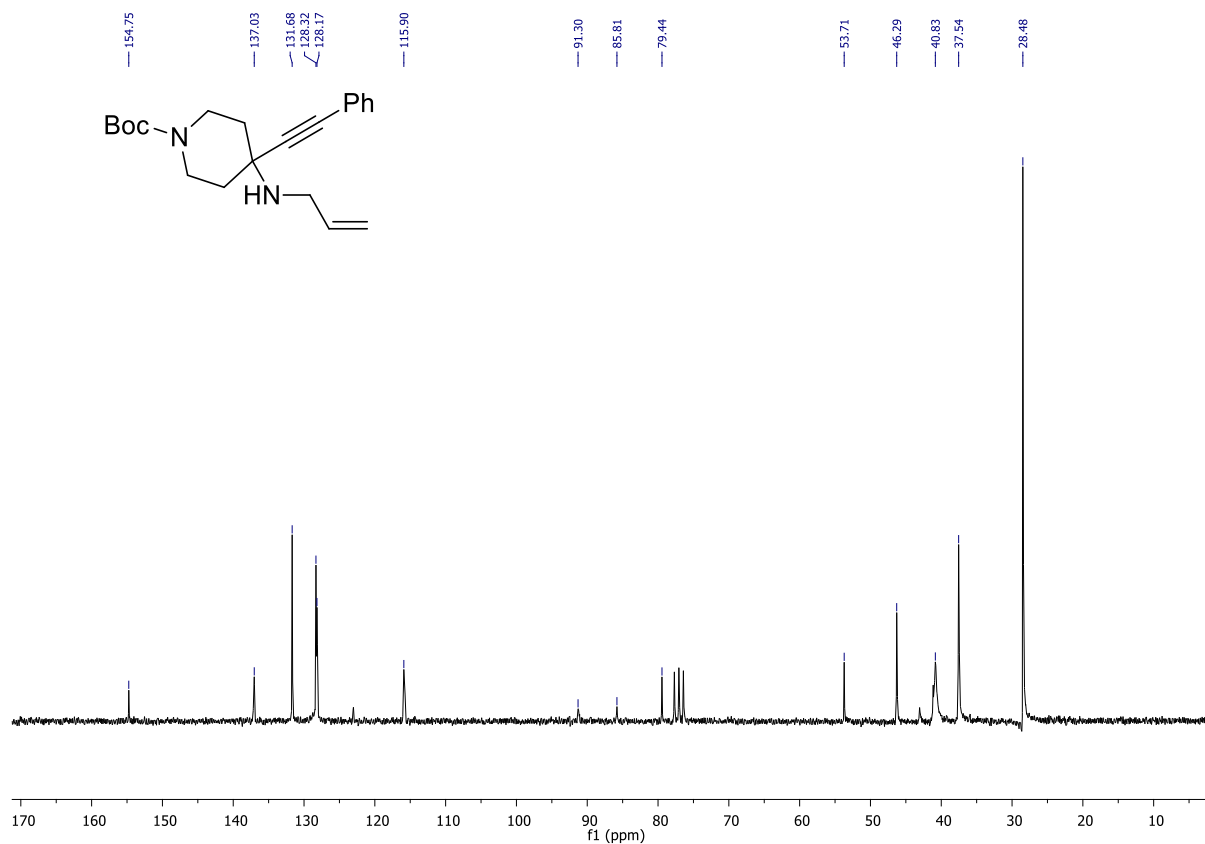

Figure S26. <sup>13</sup>C NMR spectrum of compound **24** (50 MHz, CDCl<sub>3</sub>).

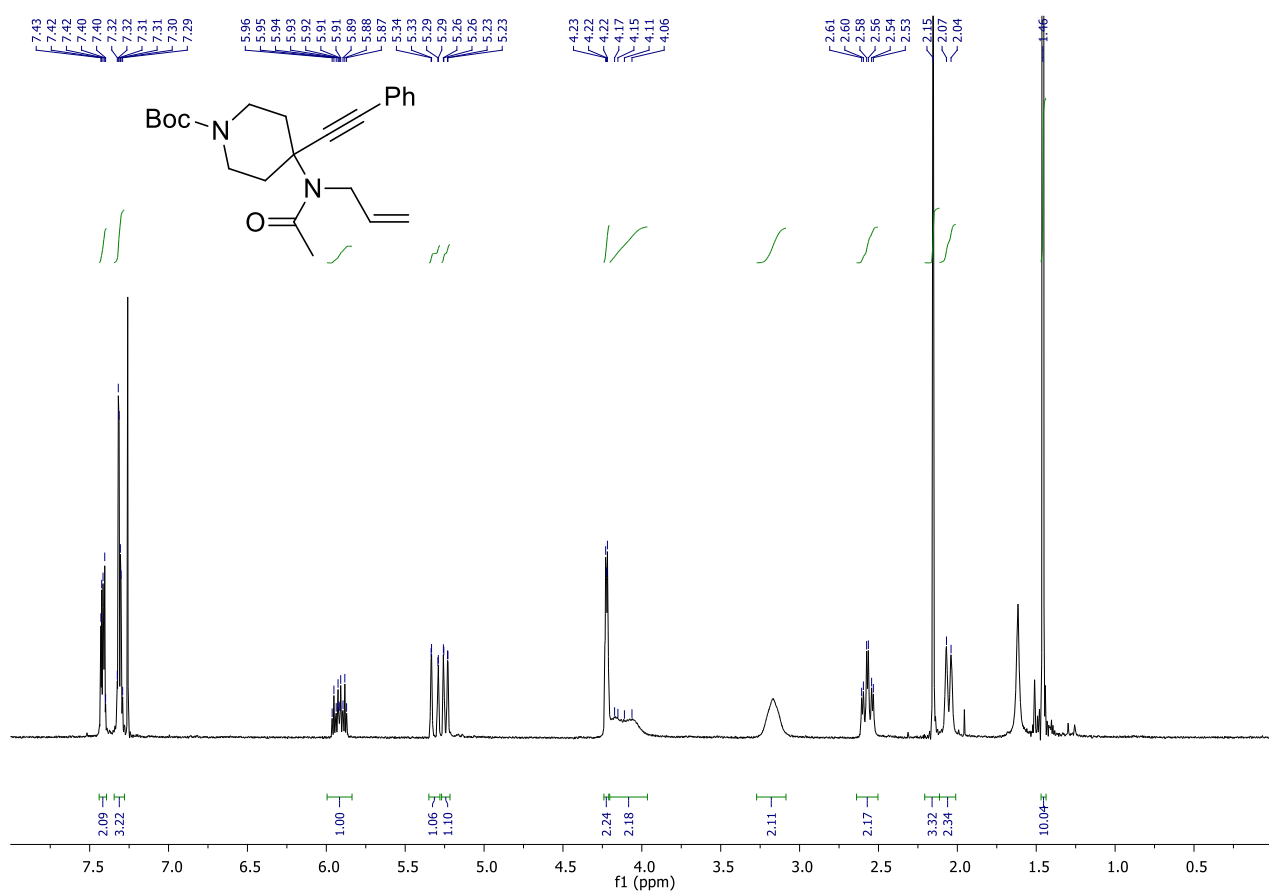

Figure S27. <sup>1</sup>H NMR spectrum of compound **25** (400 MHz, CDCl<sub>3</sub>).

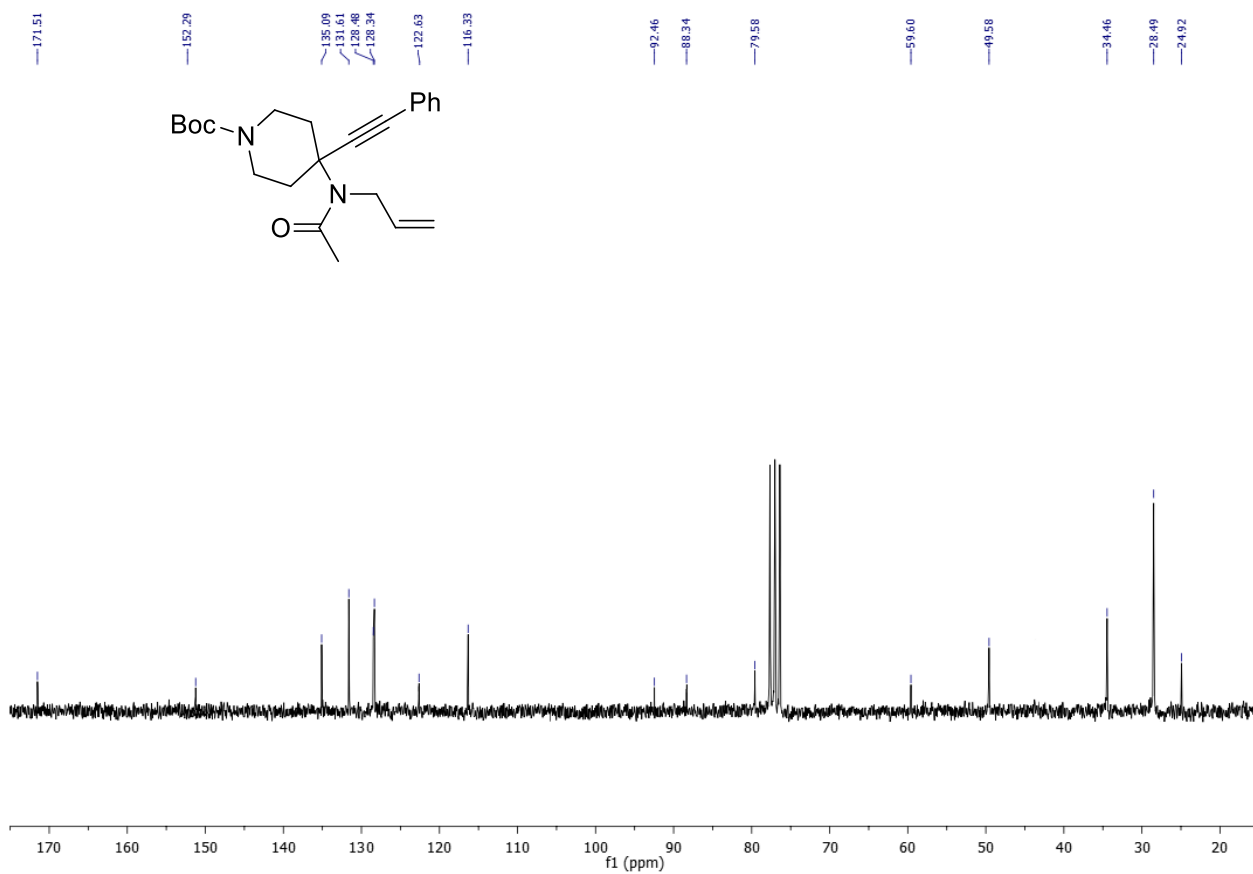

Figure S28. <sup>13</sup>C NMR spectrum of compound **25** (50 MHz, CDCl<sub>3</sub>).



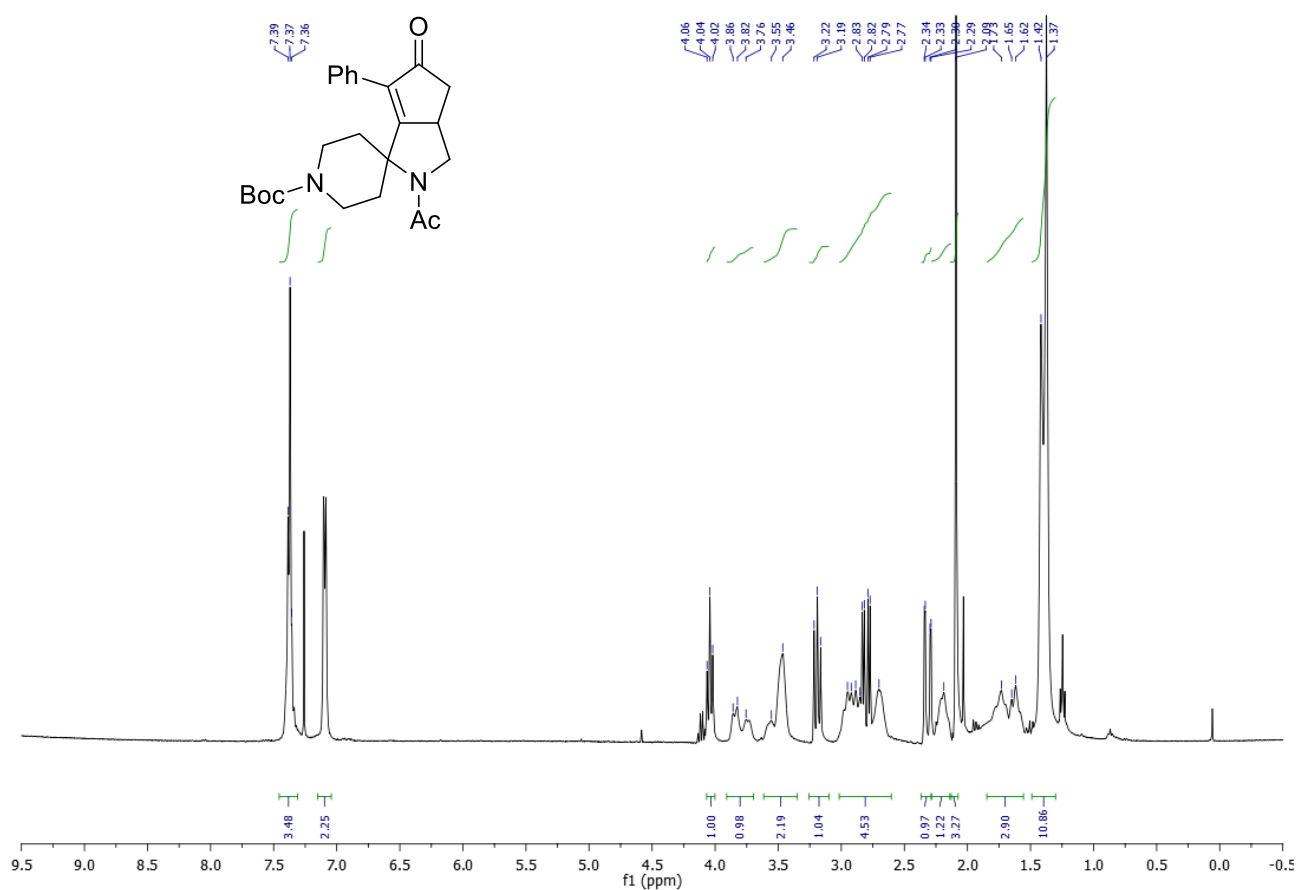

Figure S29. <sup>1</sup>H NMR spectrum of compound **26** (400 MHz, CDCl<sub>3</sub>).

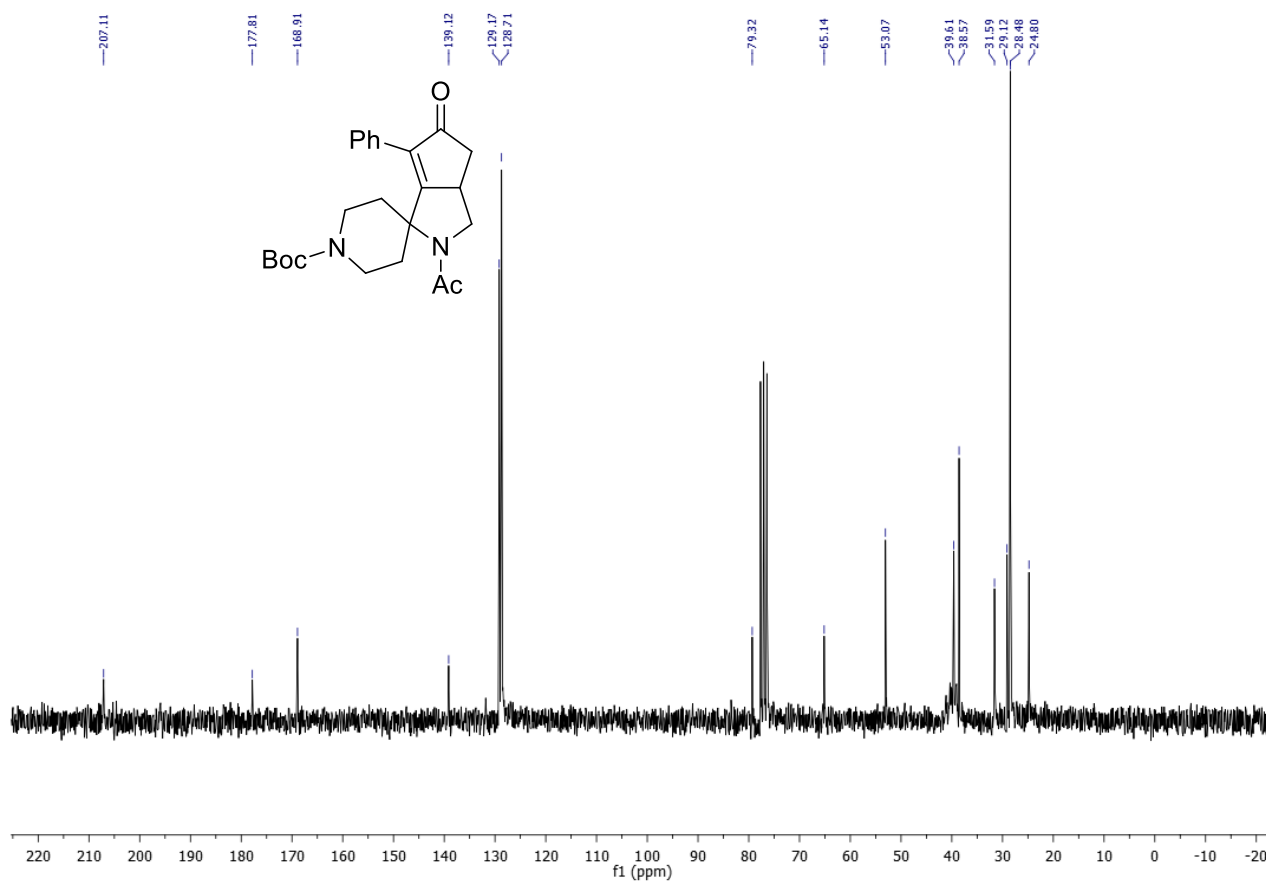

Figure S30. <sup>13</sup>C NMR spectrum of compound **26** (50 MHz, CDCl<sub>3</sub>).

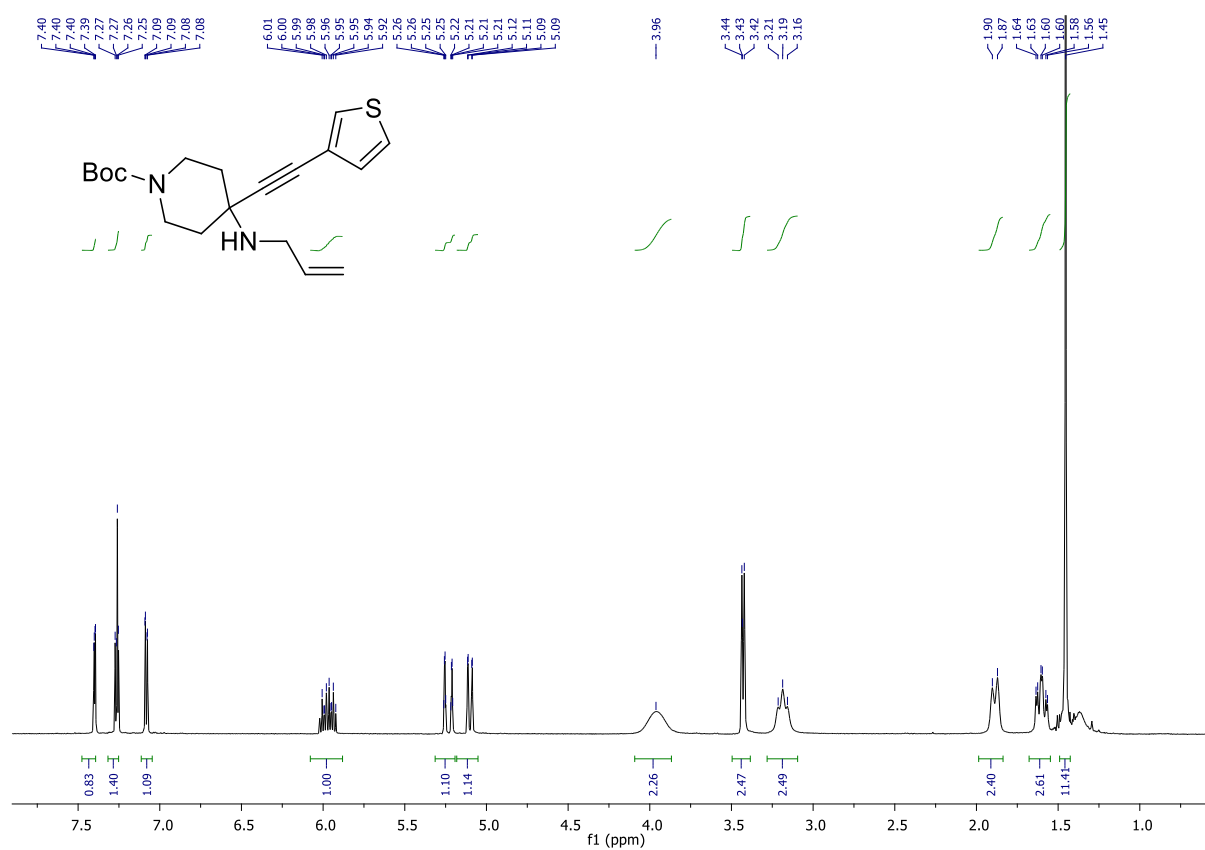

Figure S31. <sup>1</sup>H NMR spectrum of compound **27** (400 MHz, CDCl<sub>3</sub>).

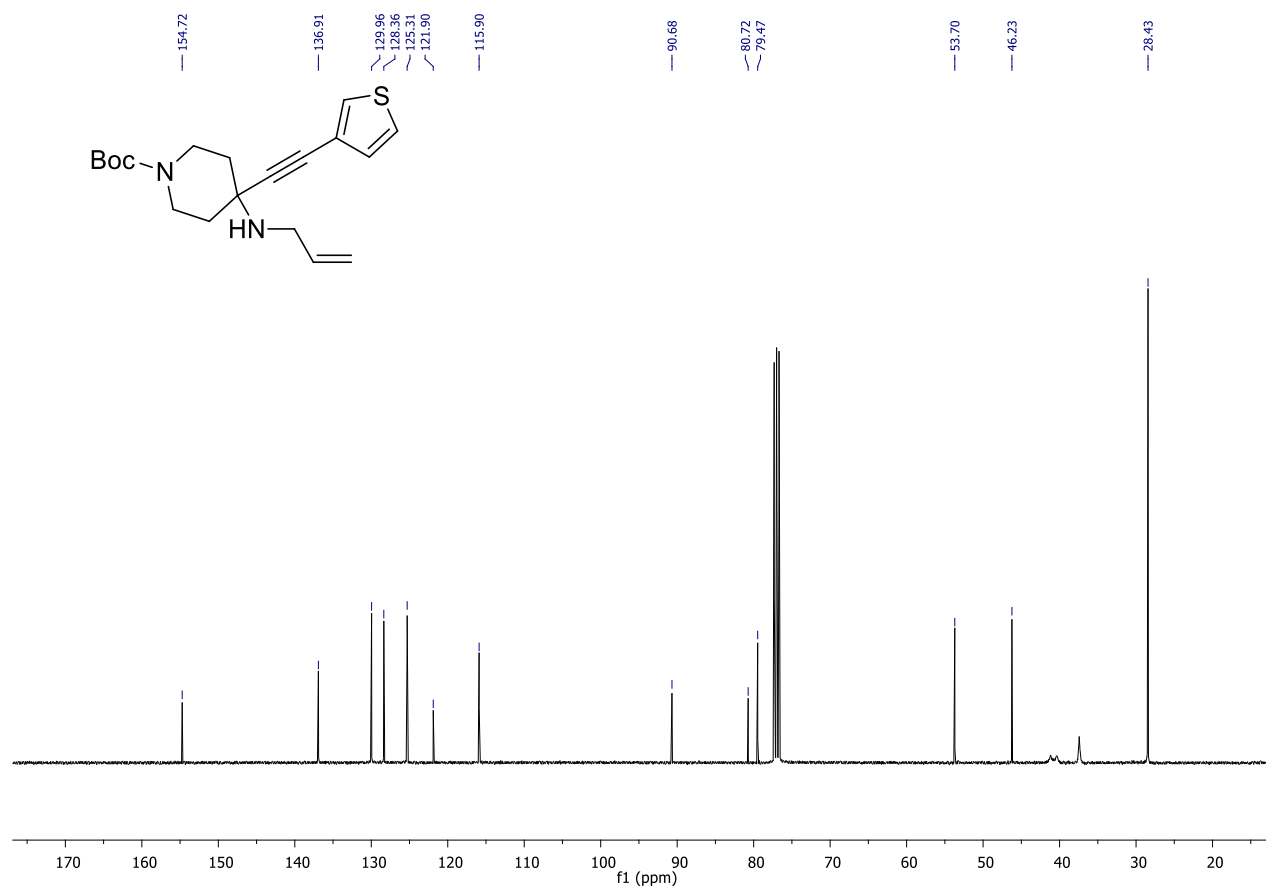

Figure S32. <sup>13</sup>C NMR spectrum of compound **27** (100 MHz, CDCl<sub>3</sub>).

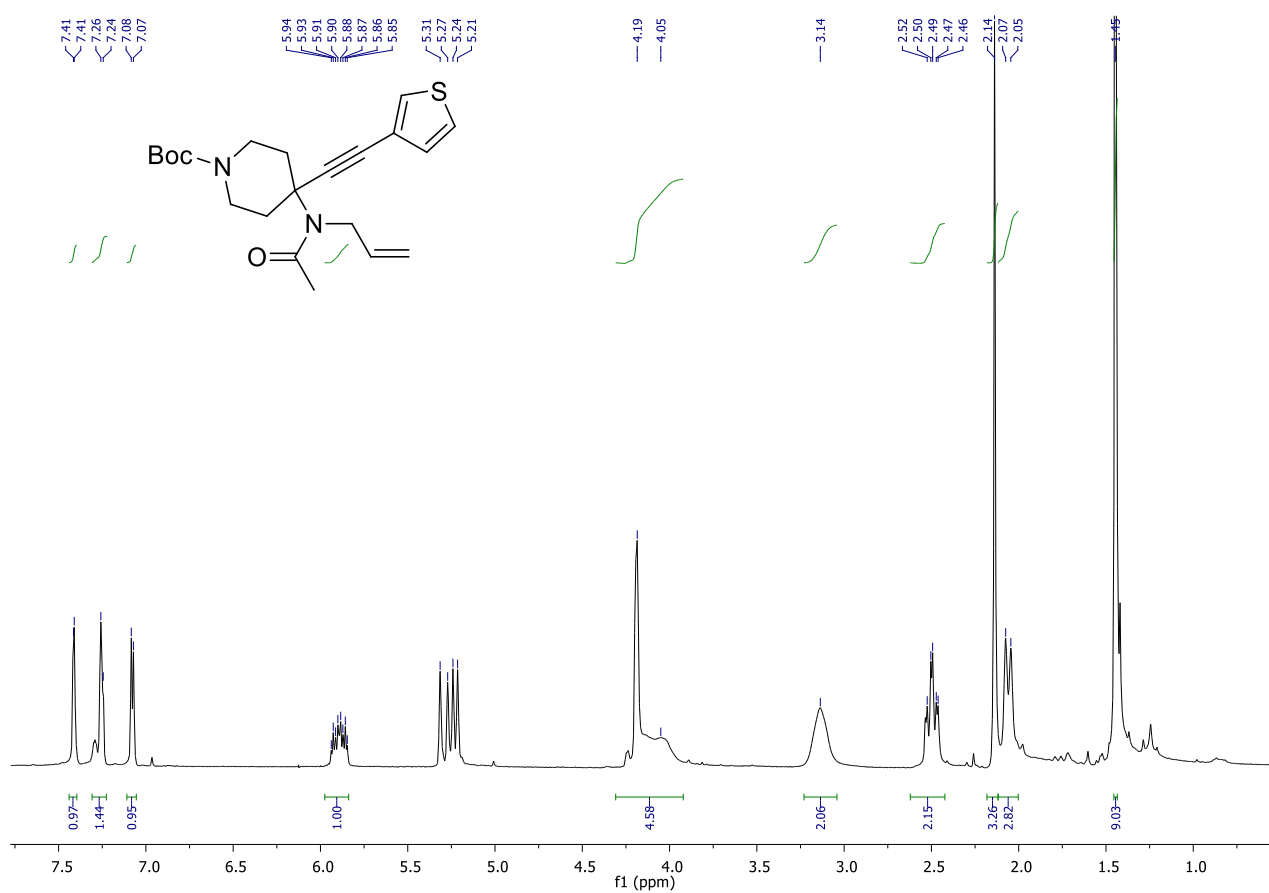

Figure S33. <sup>1</sup>H NMR spectrum of compound **28** (400 MHz, CDCl<sub>3</sub>).

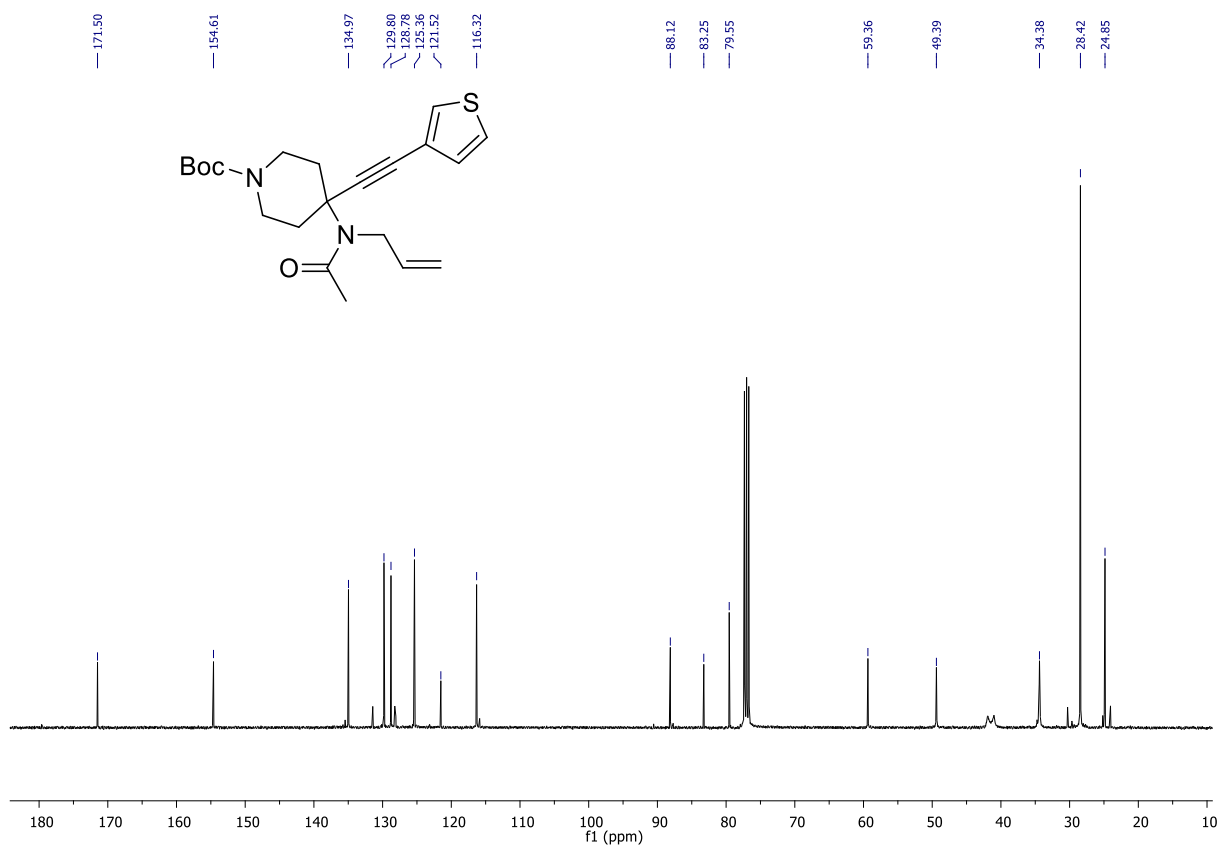

Figure S34. <sup>13</sup>C NMR spectrum of compound **28** (100 MHz, CDCl<sub>3</sub>).

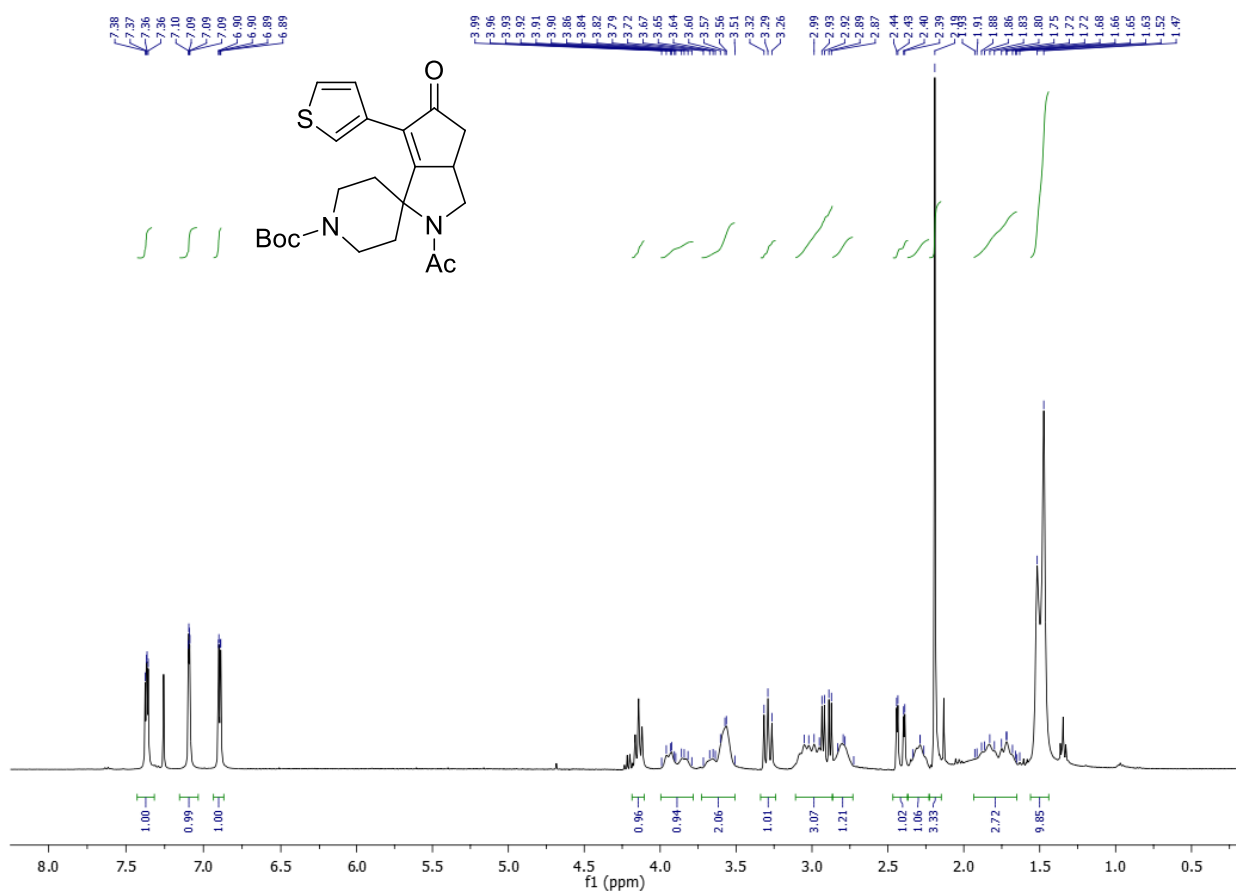

Figure S35. <sup>1</sup>H NMR spectrum of compound **29** (400 MHz, CDCl<sub>3</sub>).

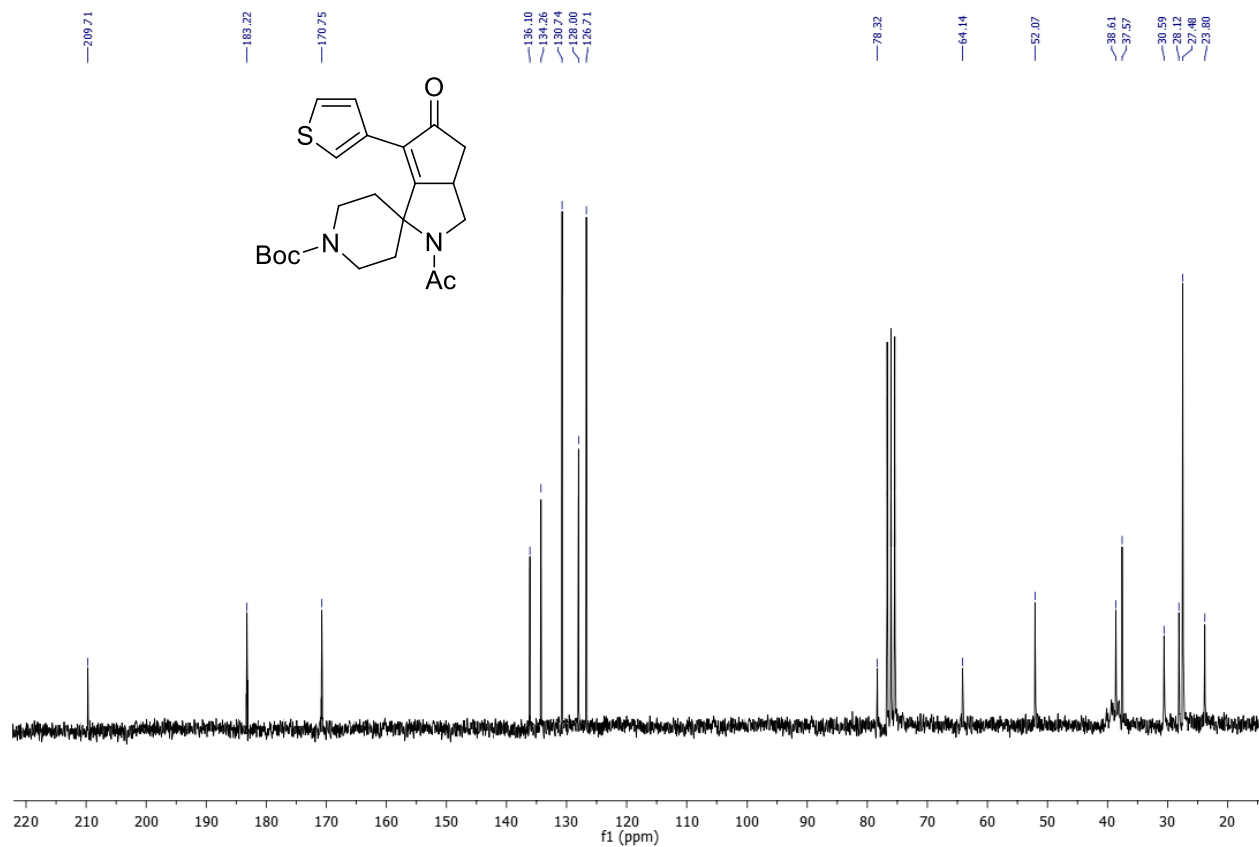

Figure S36. <sup>13</sup>C NMR spectrum of compound **29** (100 MHz, CDCl<sub>3</sub>).

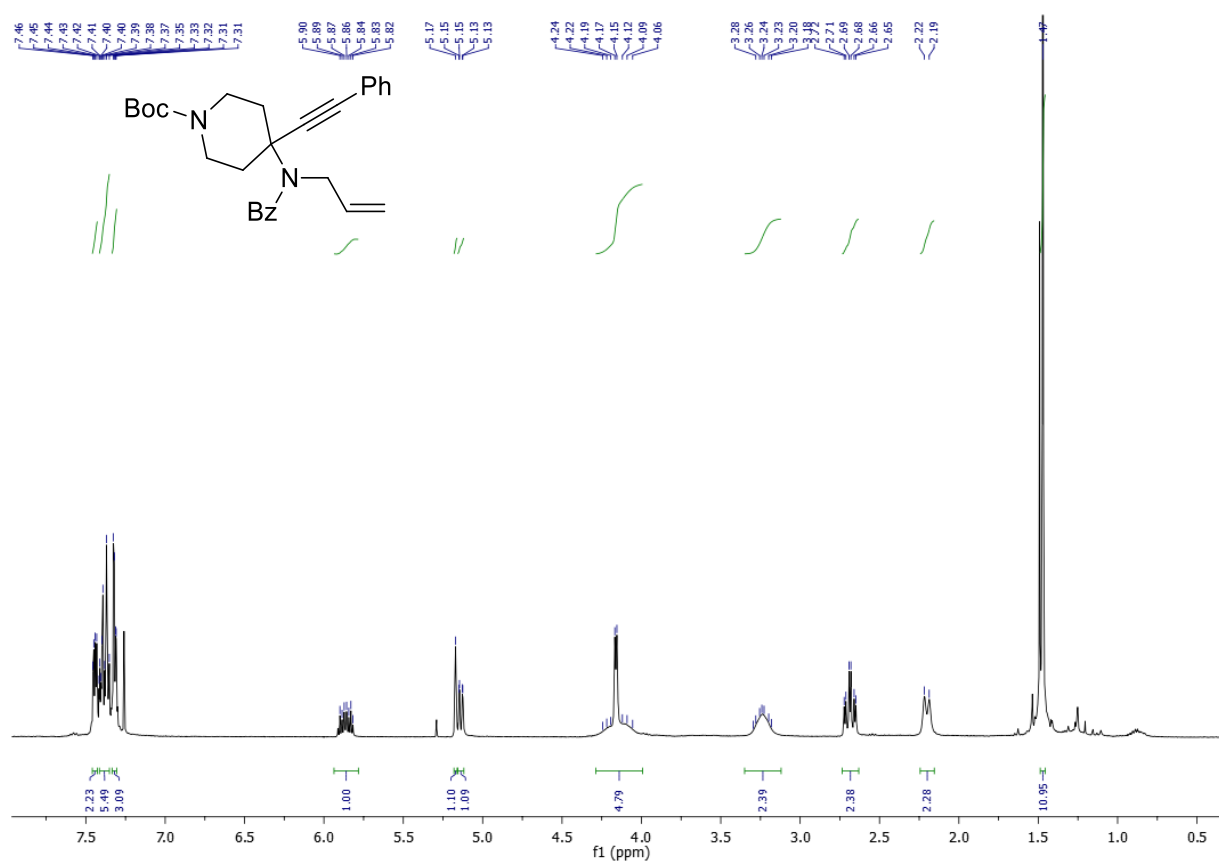

Figure S37. <sup>1</sup>H NMR spectrum of compound **30** (400 MHz, CDCl<sub>3</sub>).

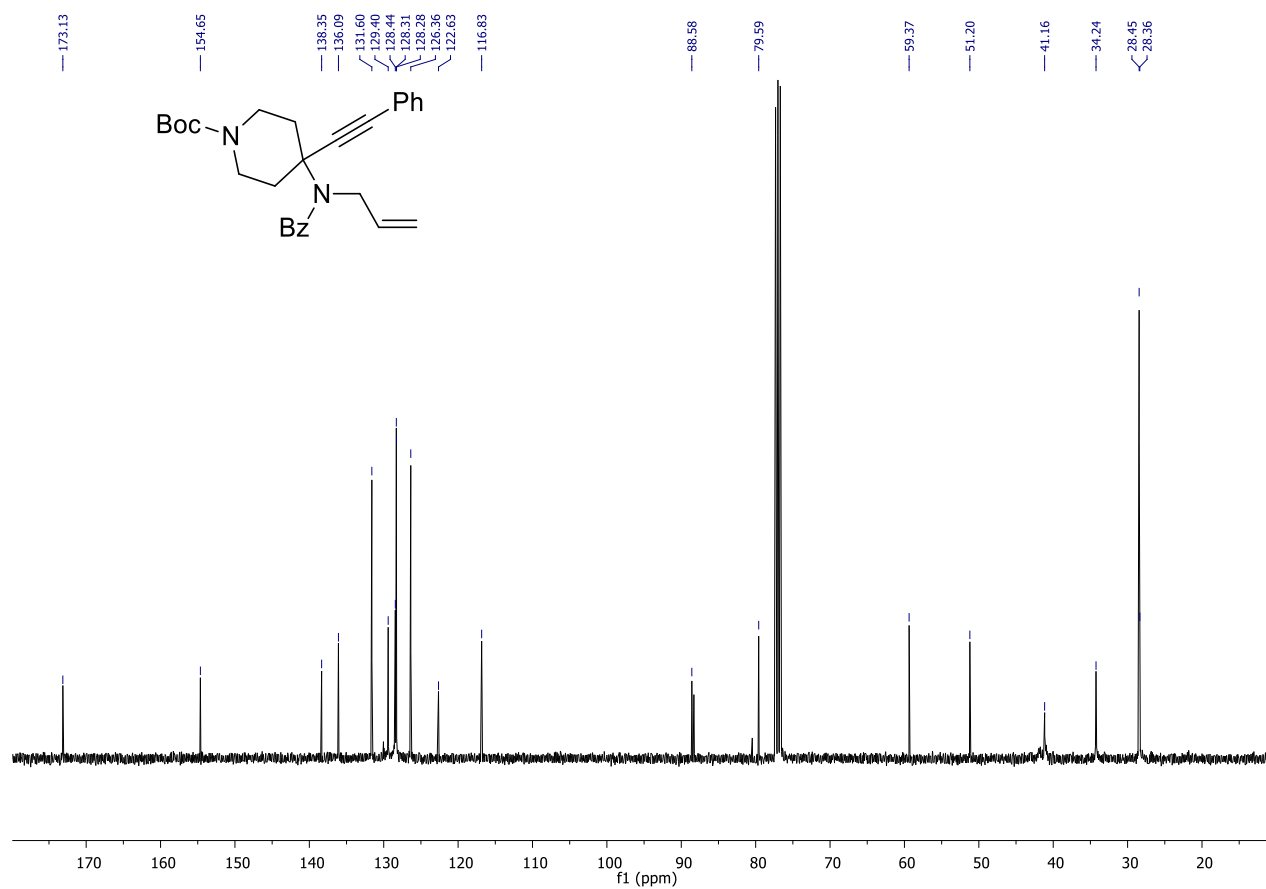

Figure S38. <sup>13</sup>C NMR spectrum of compound **30** (100 MHz, CDCl<sub>3</sub>).

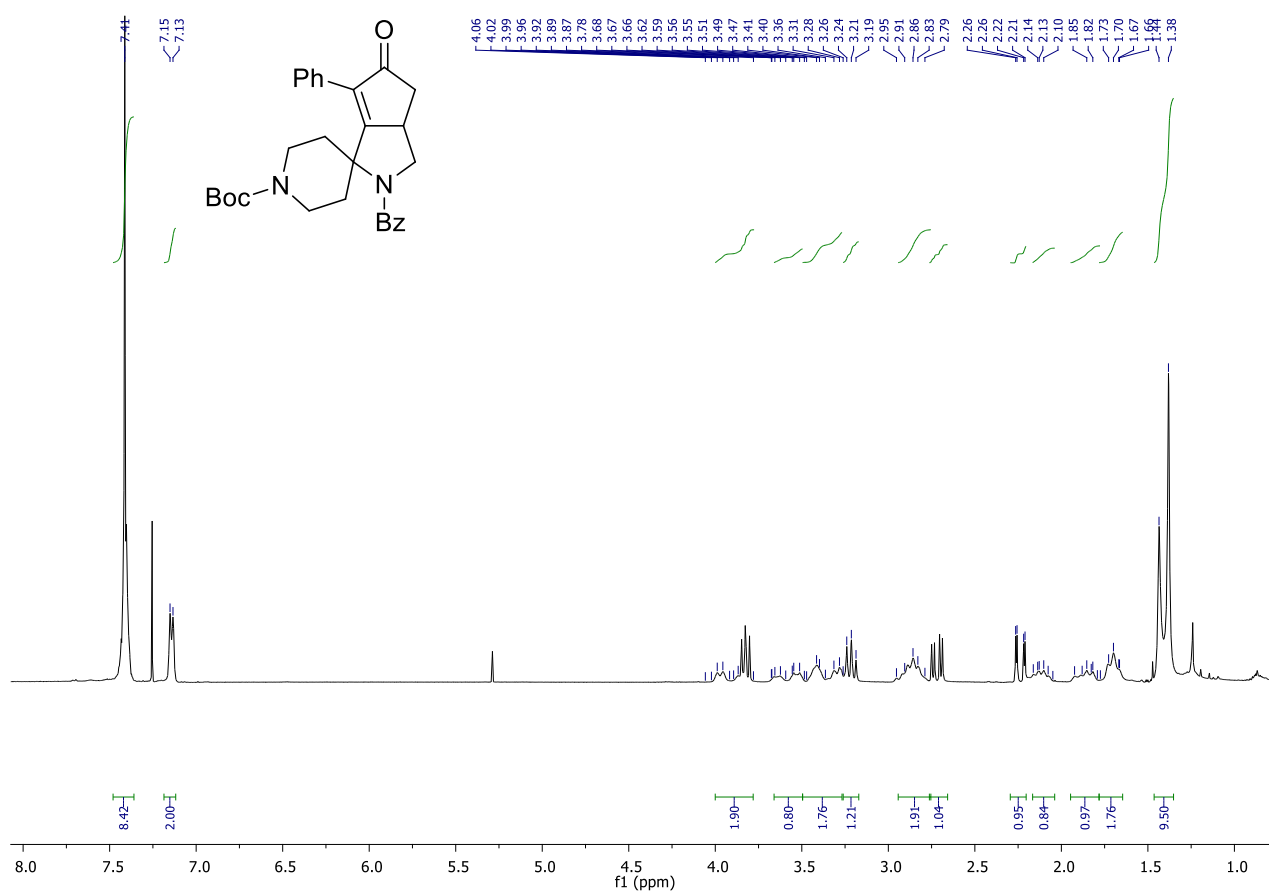

Figure S39. <sup>1</sup>H NMR spectrum of compound **31** (400 MHz, CDCl<sub>3</sub>).

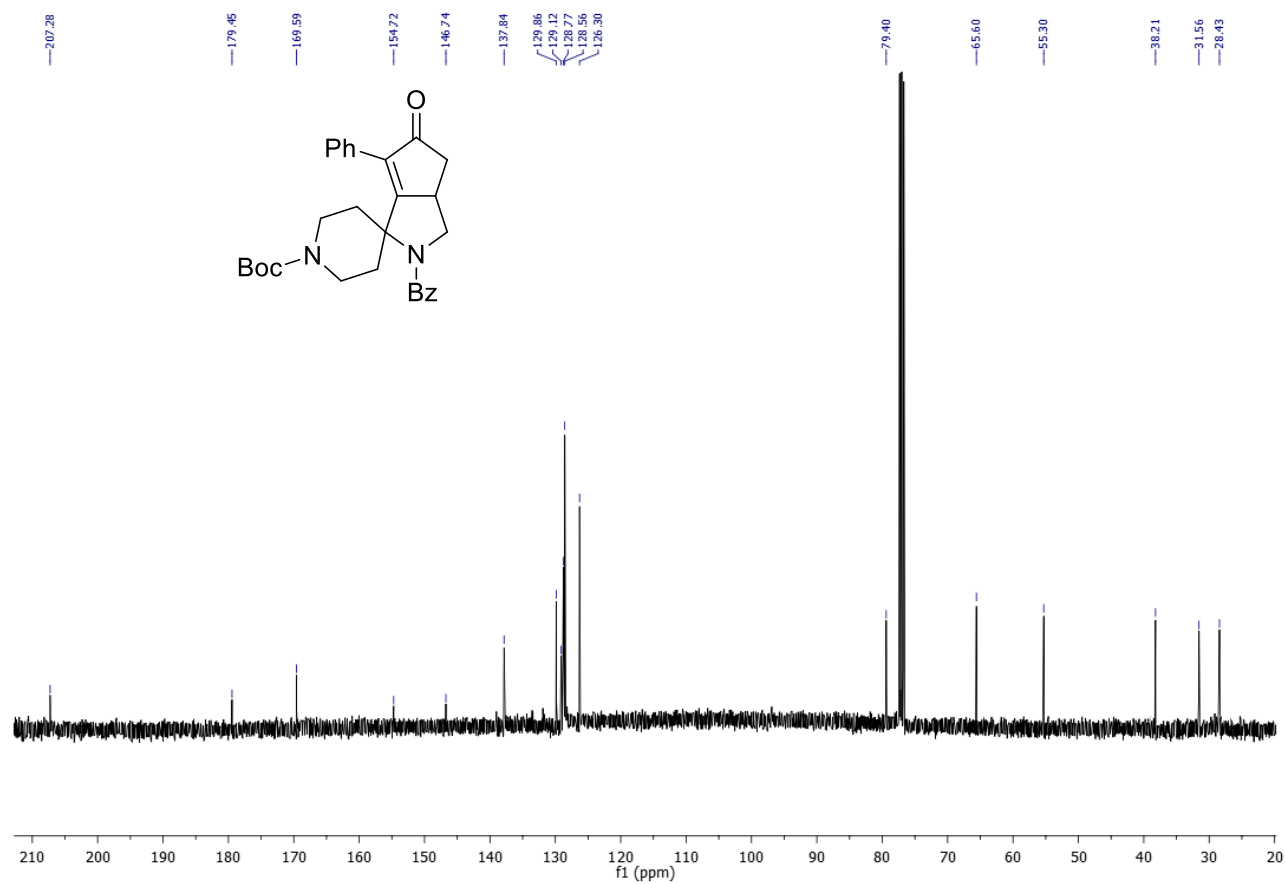

Figure S40. <sup>13</sup>C NMR spectrum of compound **31** (100 MHz, CDCl<sub>3</sub>).

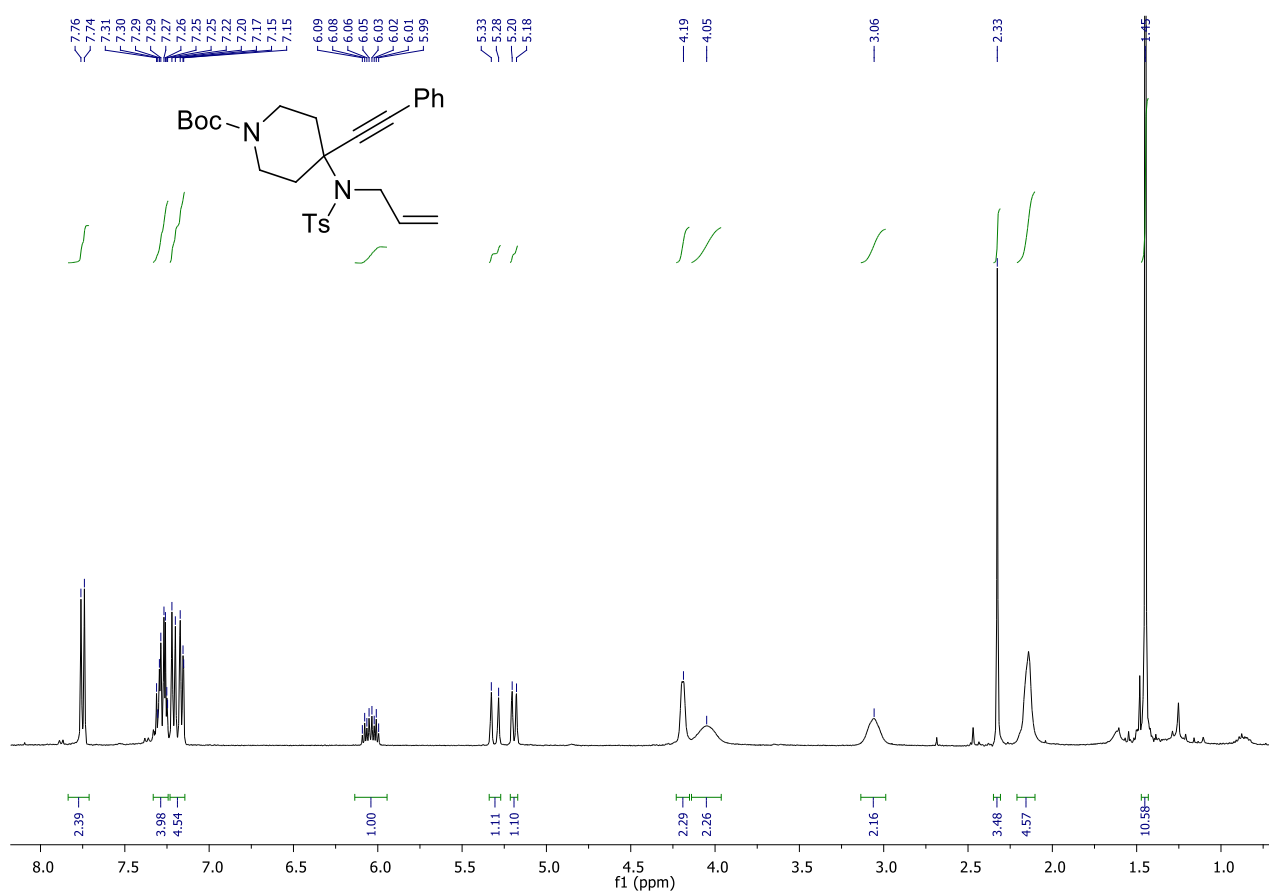

Figure S41. <sup>1</sup>H NMR spectrum of compound **32** (400 MHz, CDCl<sub>3</sub>).

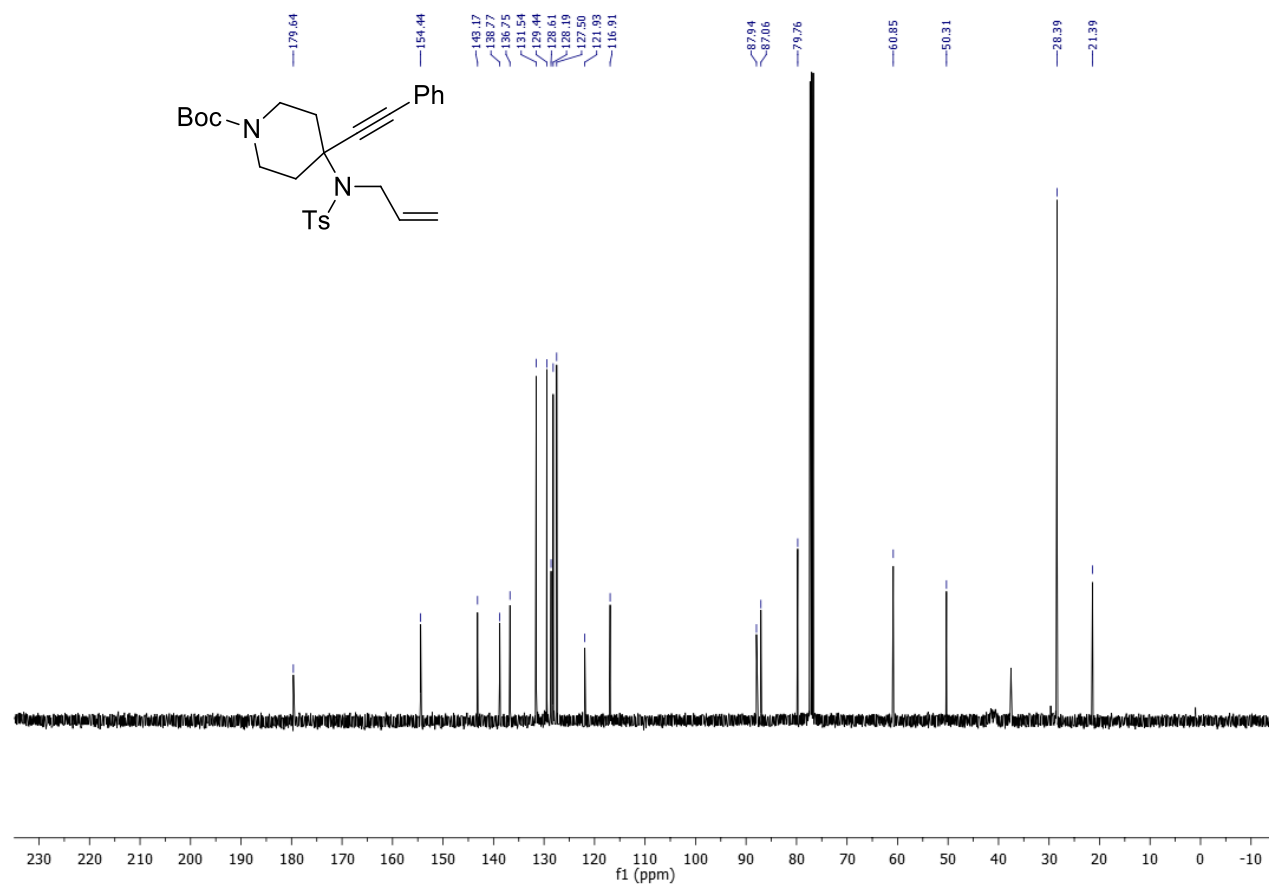

Figure S42. <sup>13</sup>C NMR spectrum of compound **32** (100 MHz, CDCl<sub>3</sub>).

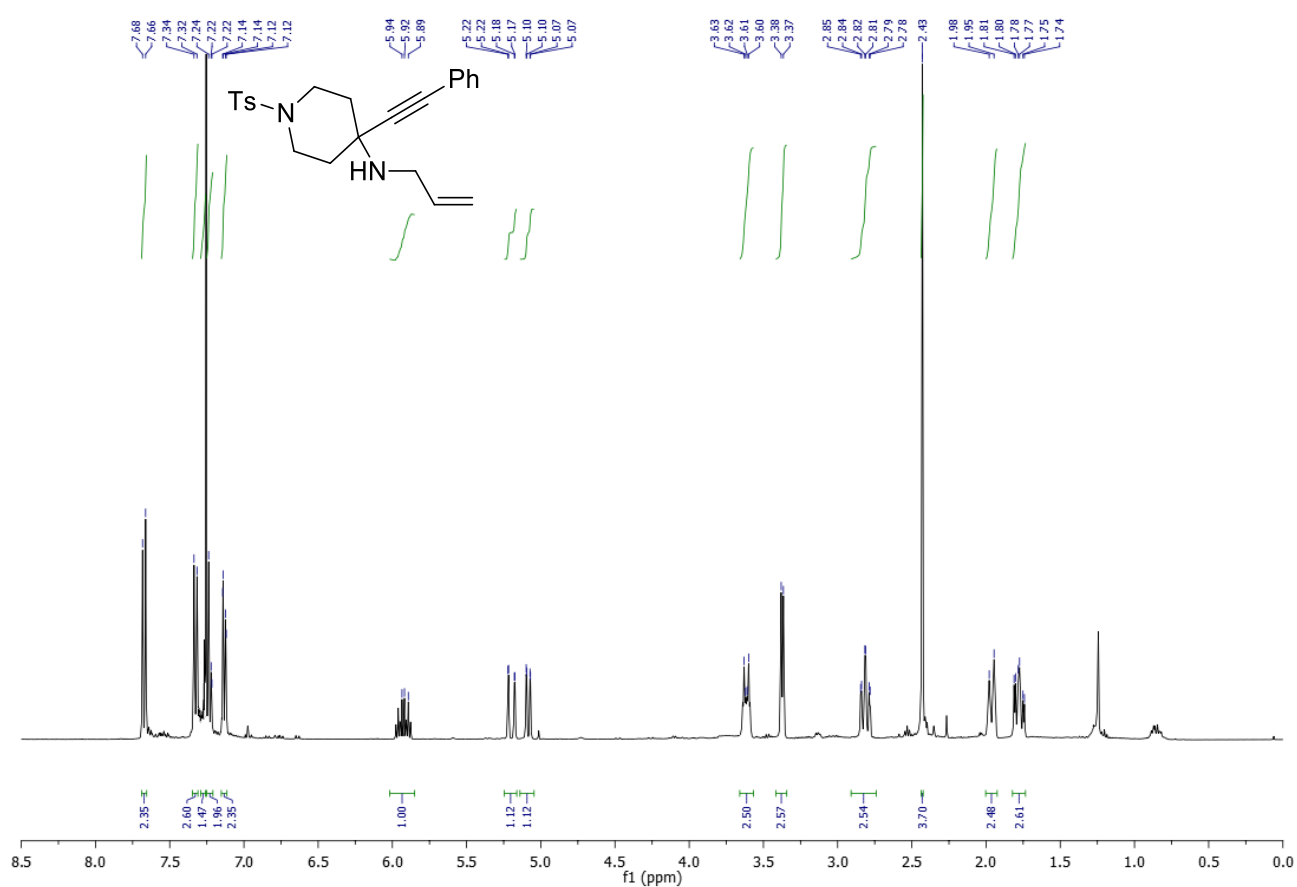

Figure S43. <sup>1</sup>H NMR spectrum of compound **34** (400 MHz, CDCl<sub>3</sub>).

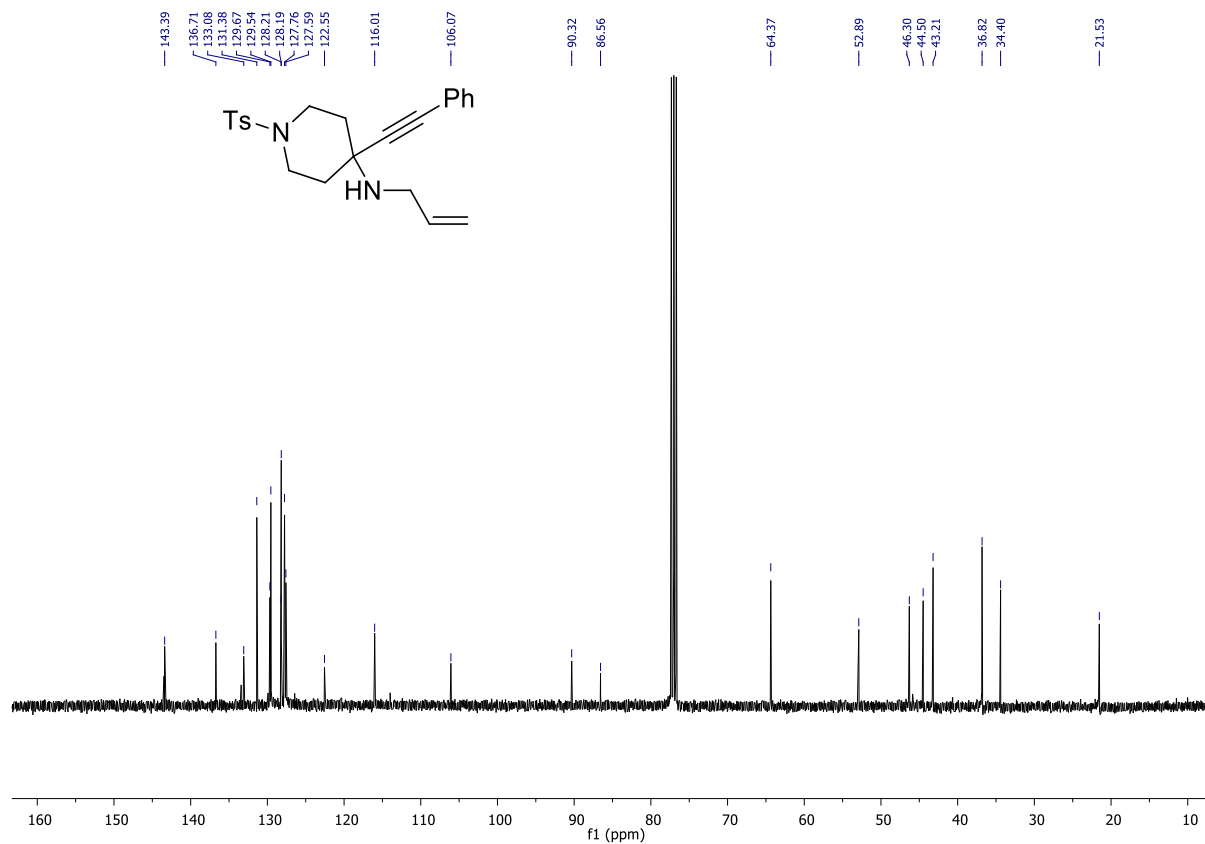

Figure S44. <sup>13</sup>C NMR spectrum of compound **34** (100 MHz, CDCl<sub>3</sub>).



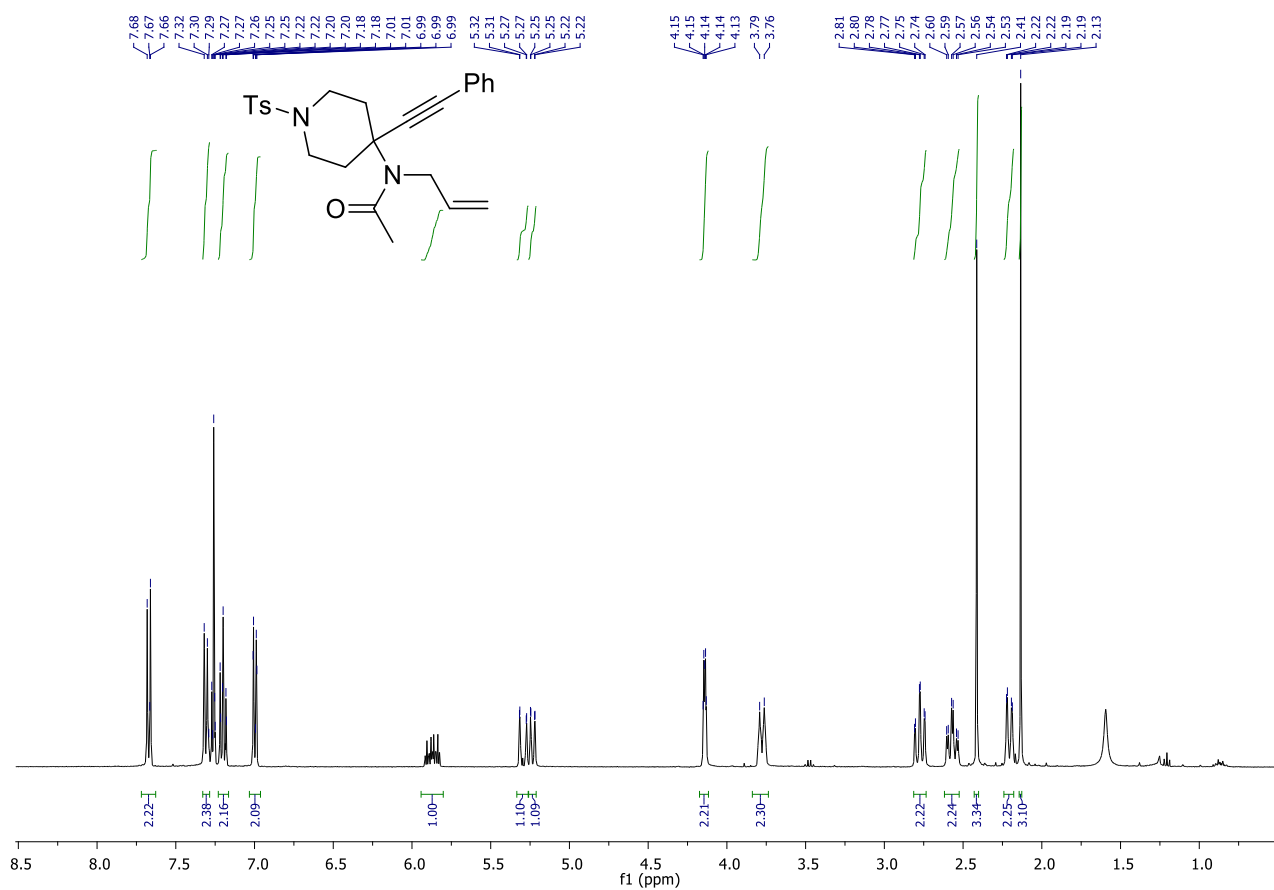

Figure S45. <sup>1</sup>H NMR spectrum of compound **35** (400 MHz, CDCl<sub>3</sub>).

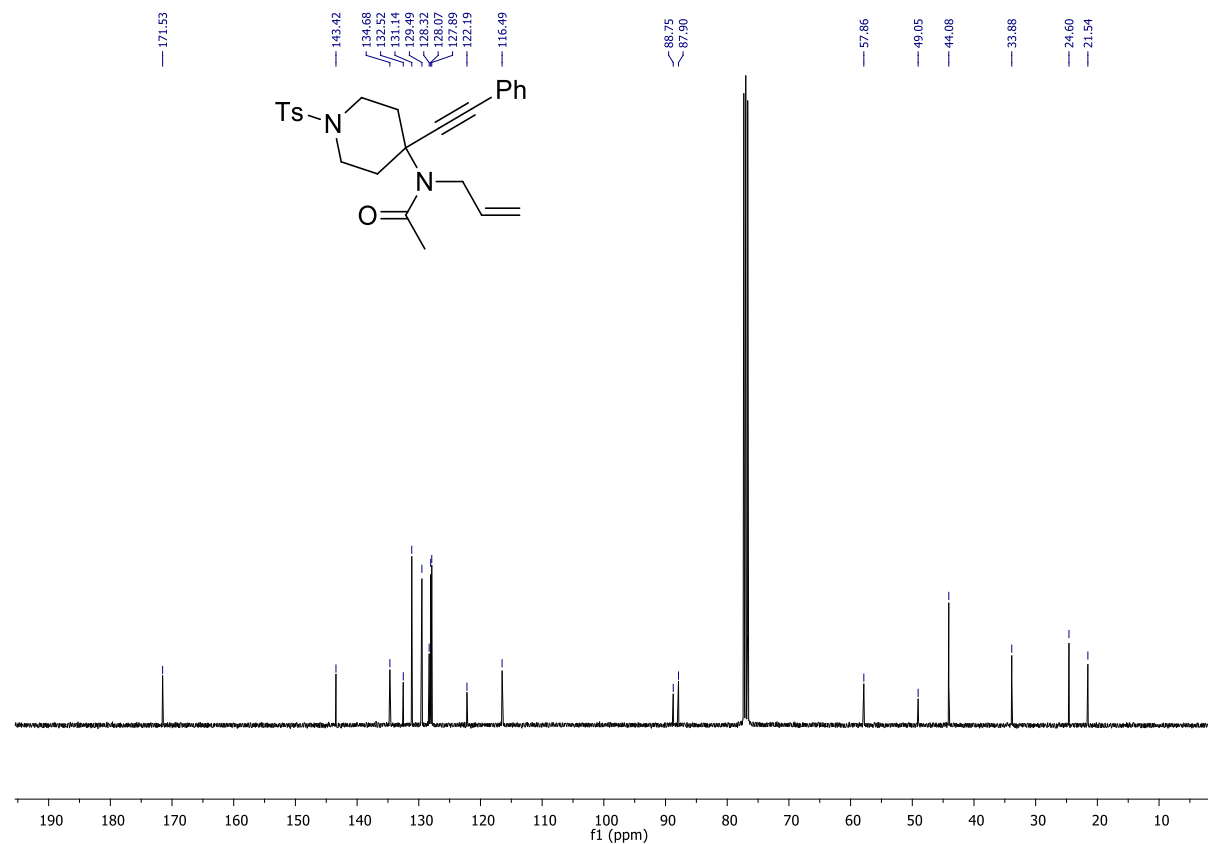

Figure S46. <sup>13</sup>C NMR spectrum of compound **35** (100 MHz, CDCl<sub>3</sub>).

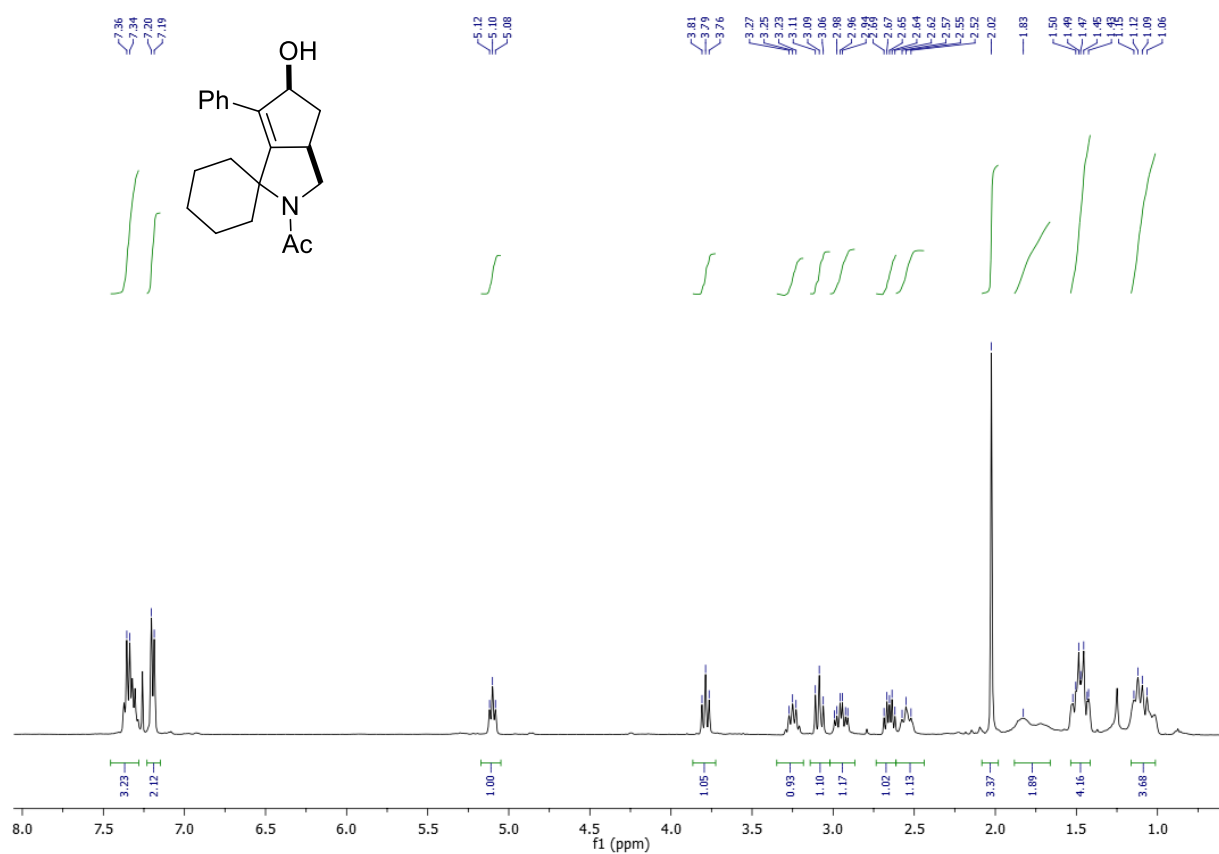

Figure S47. <sup>1</sup>H NMR spectrum of compound **36** (400 MHz, CDCl<sub>3</sub>).

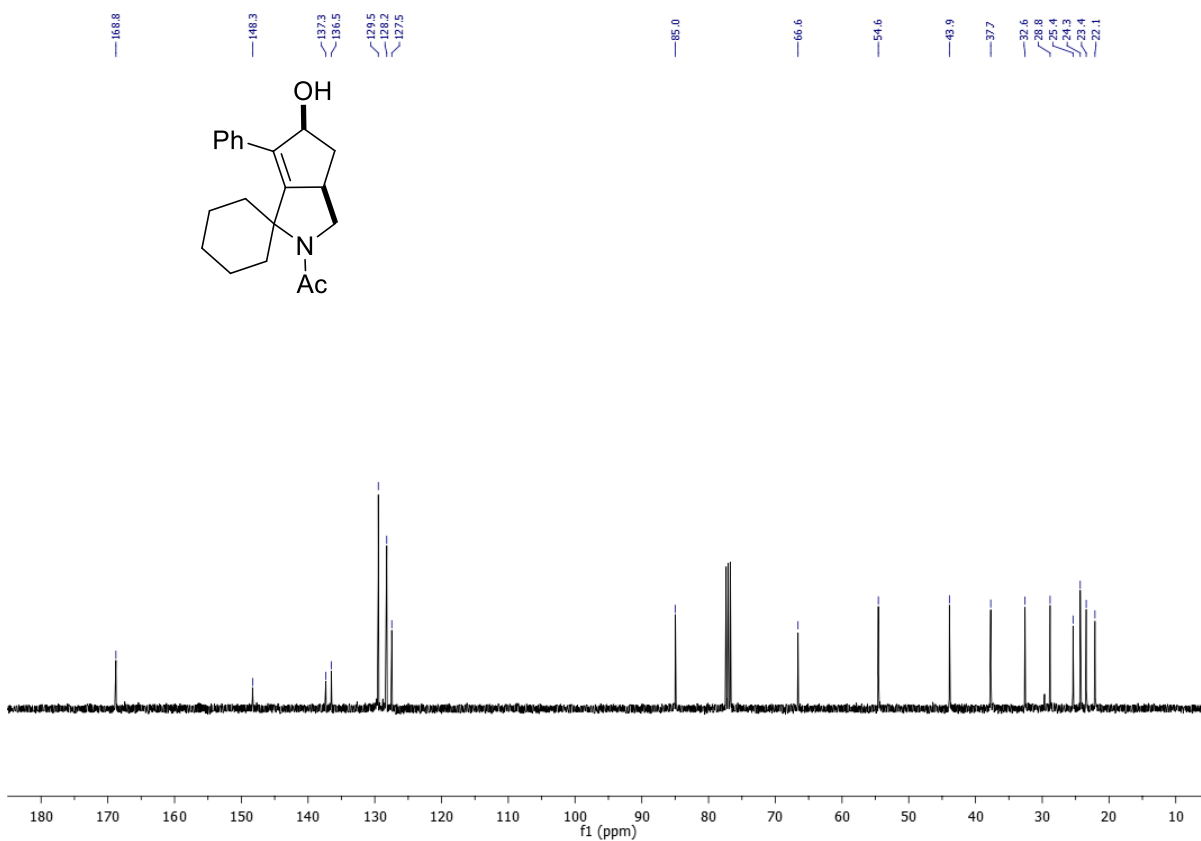

Figure S48. <sup>13</sup>C NMR spectrum of compound **36** (100 MHz, CDCl<sub>3</sub>).

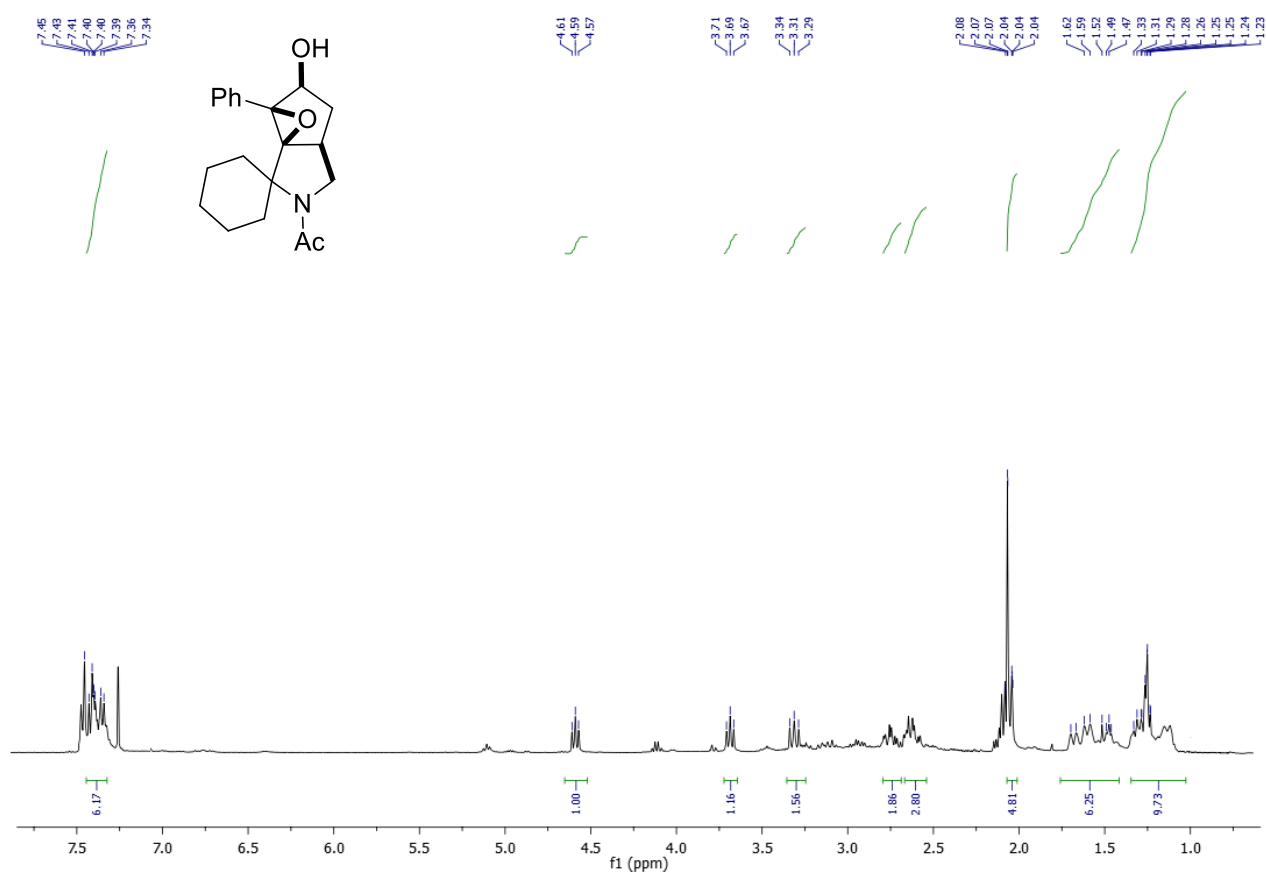

Figure S49. <sup>1</sup>H NMR spectrum of compound **37** (400 MHz, CDCl<sub>3</sub>).

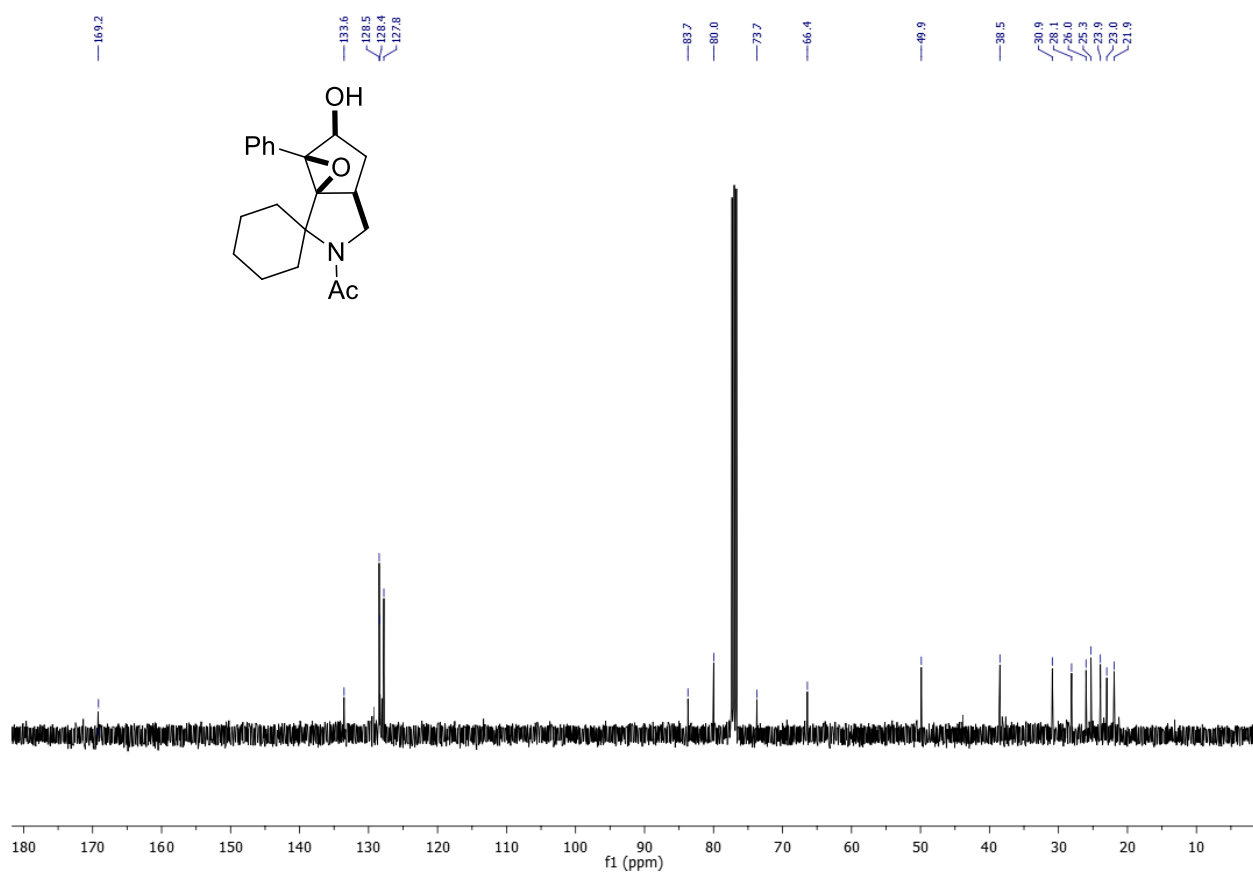

Figure S50. <sup>13</sup>C NMR spectrum of compound **37** (100 MHz, CDCl<sub>3</sub>).

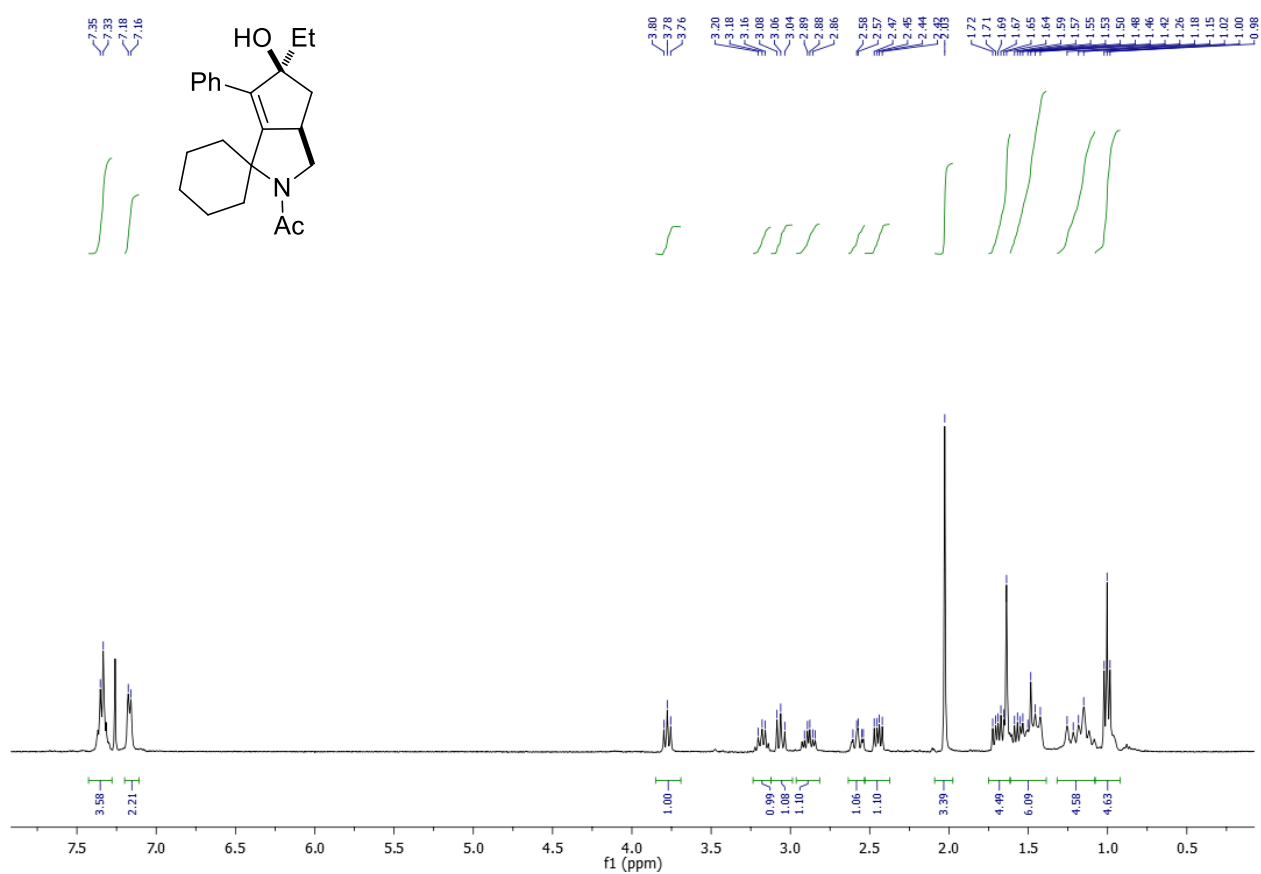

Figure S51. <sup>1</sup>H NMR spectrum of compound **38** (400 MHz, CDCl<sub>3</sub>).

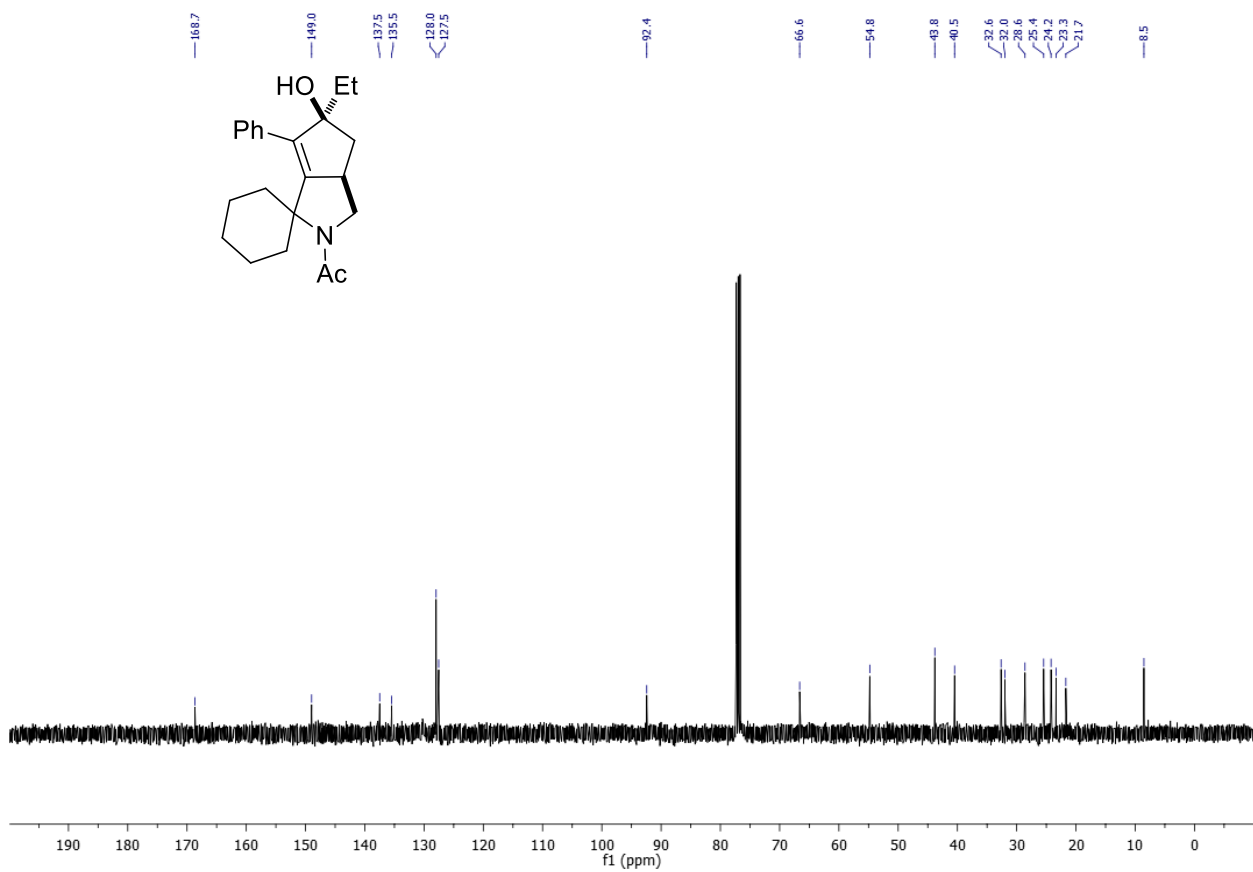

Figure S52. <sup>13</sup>C NMR spectrum of compound **38** (100 MHz, CDCl<sub>3</sub>).

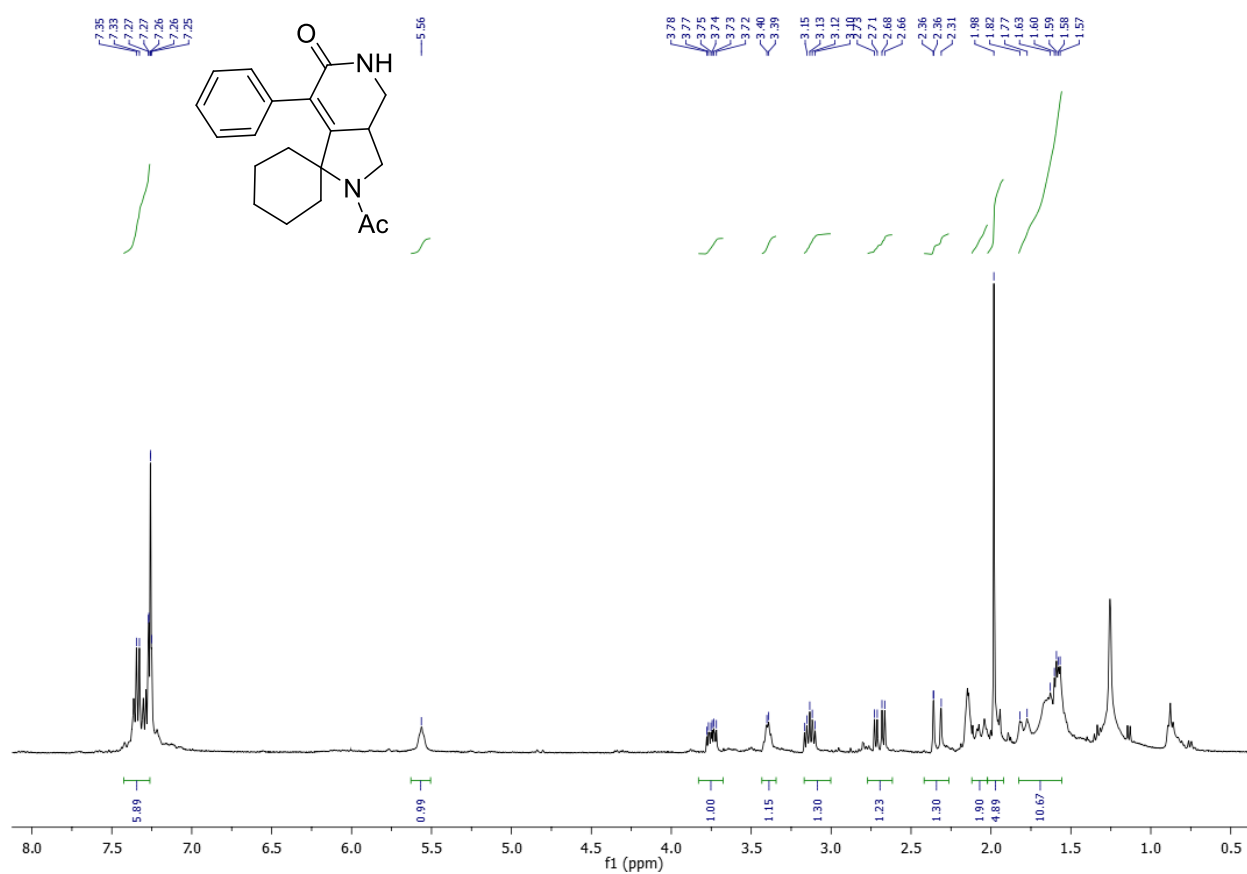

Figure S53. <sup>1</sup>H NMR spectrum of compound **39** (400 MHz, CDCl<sub>3</sub>).

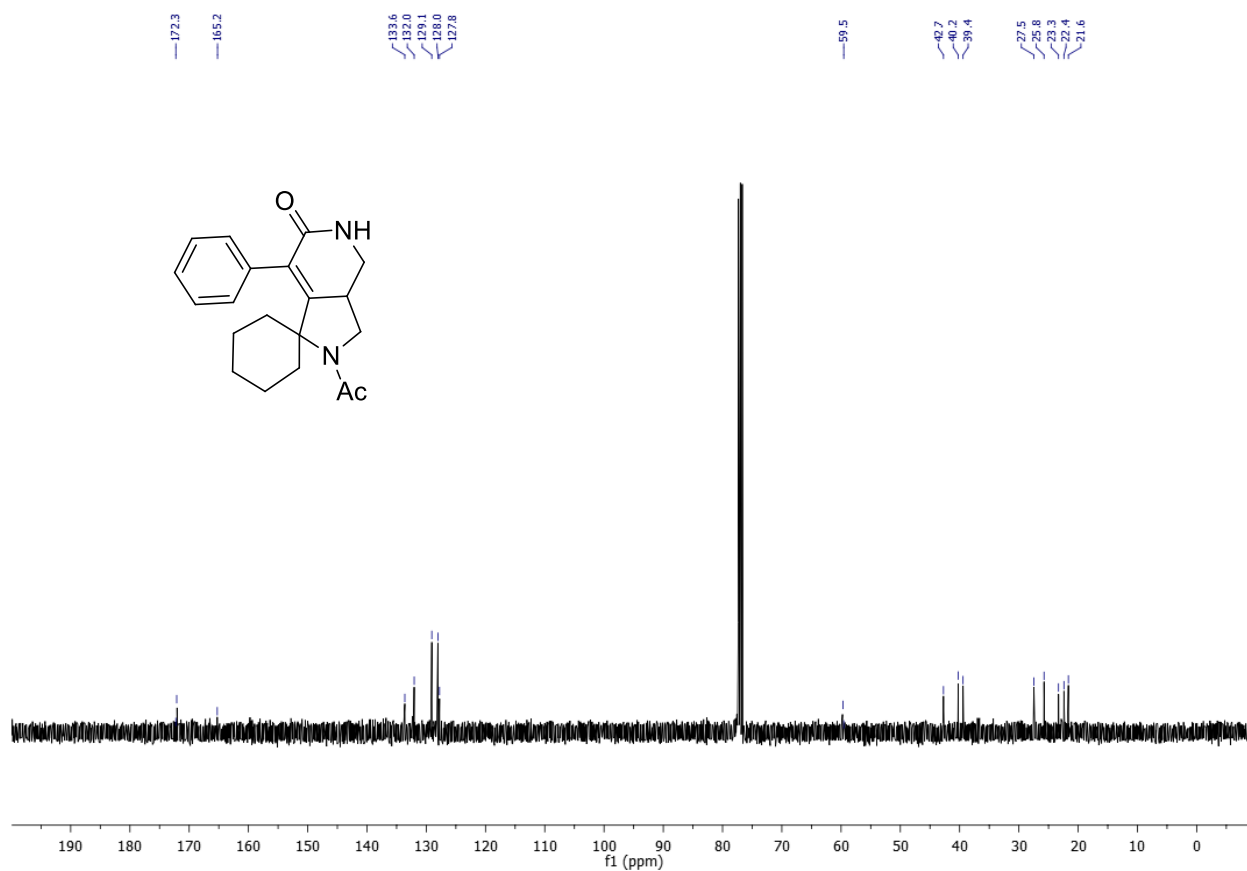

Figure S54. <sup>13</sup>C NMR spectrum of compound **39** (100 MHz, CDCl<sub>3</sub>).

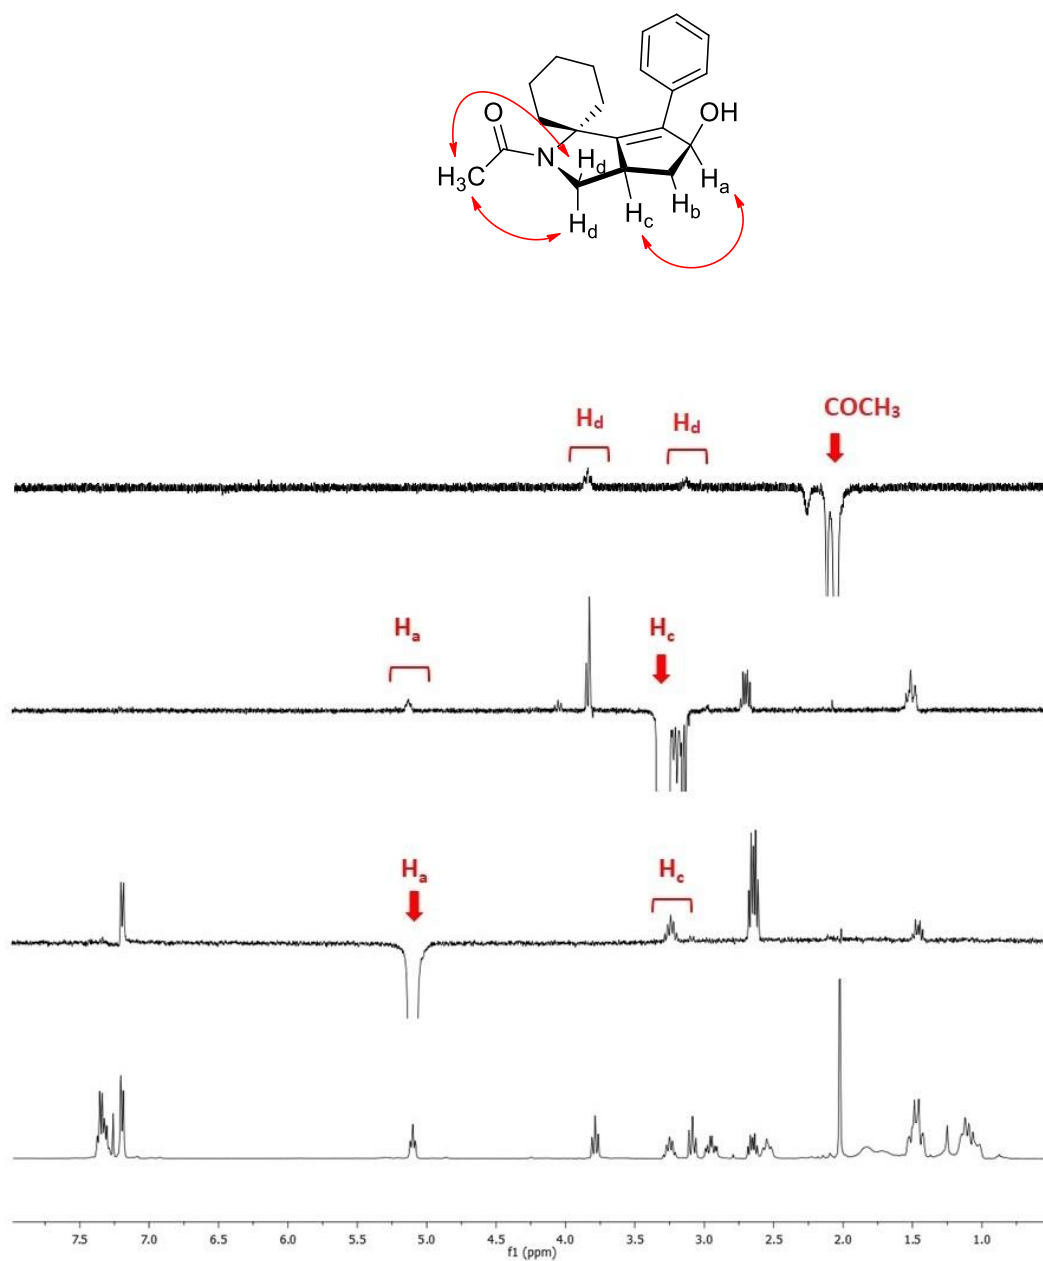

Figure S55. Selected NOE contacts from NOESY 1D spectra of compound **36** (400 MHz,  $CDCl_3$ ).

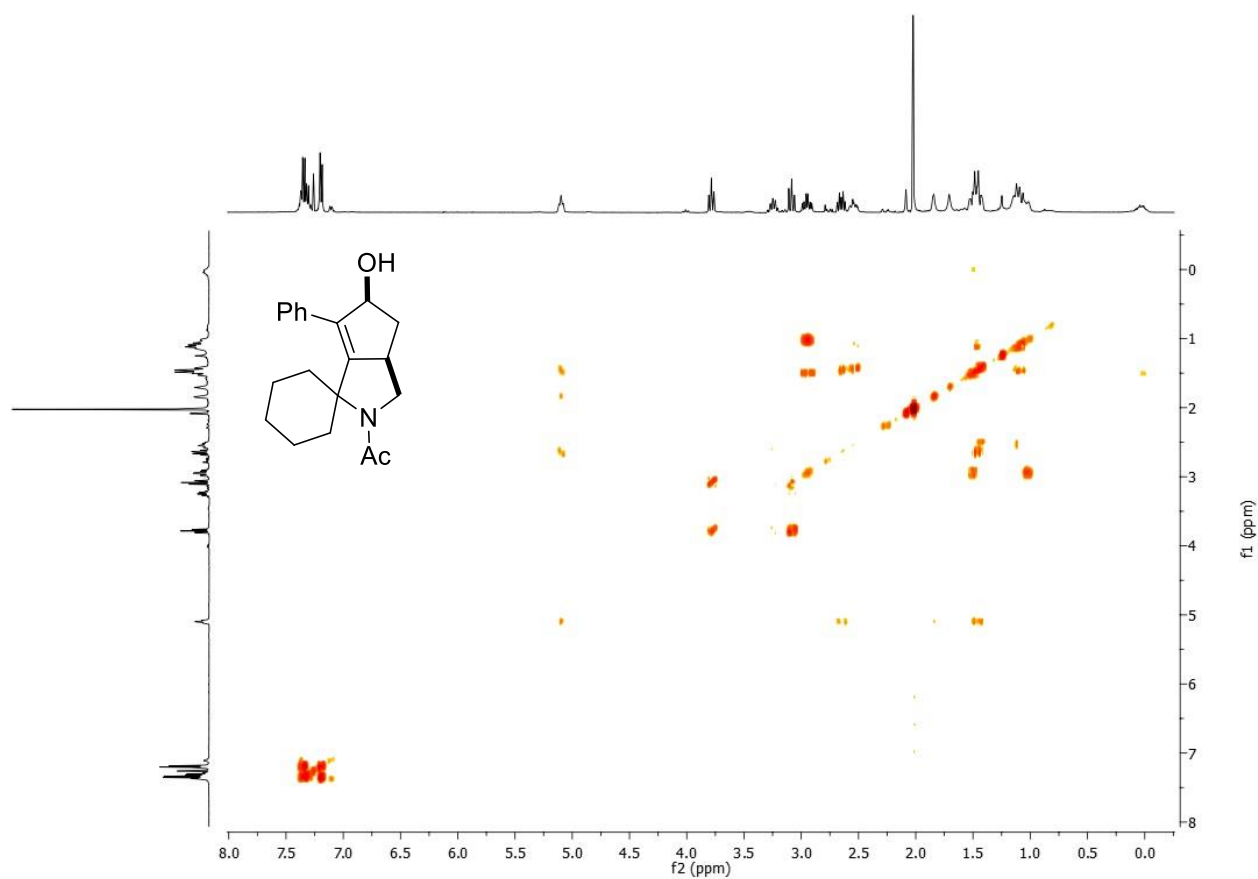

Figure S56. gCOSY spectrum of compound **36** (400 MHz, CDCl<sub>3</sub>)

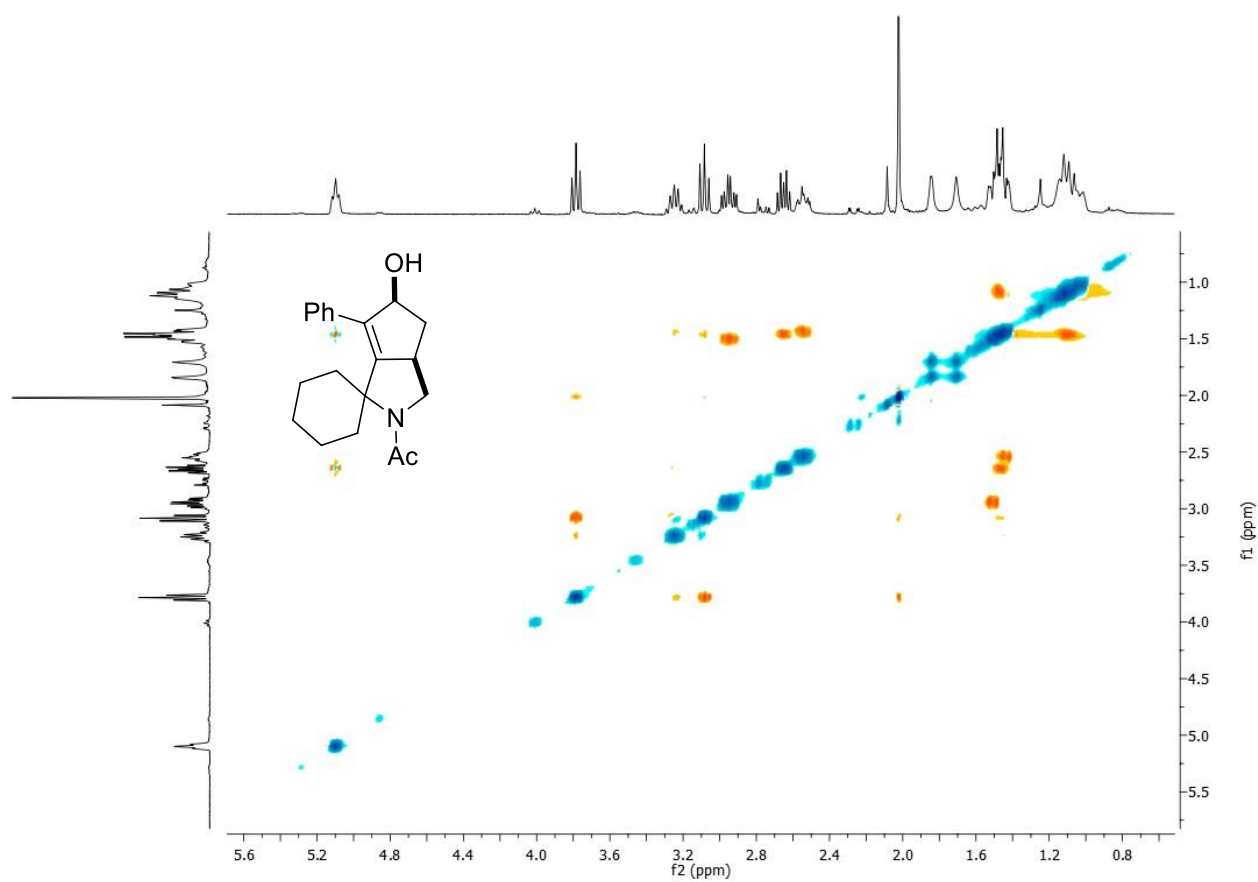

Figure S57. NOESY spectrum of compound **36** (400 MHz, CDCl<sub>3</sub>).

Table S2. Cartesian coordinates of compound **36** as in the PDB structure:

|        |    |    |     |      |        |        |        |      |      |   |
|--------|----|----|-----|------|--------|--------|--------|------|------|---|
| HETATM | 1  | N  | UNK | 0001 | -0.843 | 1.967  | 1.864  | 0.00 | 0.00 | N |
| HETATM | 2  | C  | UNK | 0001 | 1.214  | 0.970  | 2.947  | 0.00 | 0.00 | C |
| HETATM | 3  | C  | UNK | 0001 | 1.434  | 2.818  | 1.136  | 0.00 | 0.00 | C |
| HETATM | 4  | C  | UNK | 0001 | 2.832  | 2.886  | 3.244  | 0.00 | 0.00 | C |
| HETATM | 5  | C  | UNK | 0001 | 2.116  | 3.700  | 2.178  | 0.00 | 0.00 | C |
| HETATM | 6  | C  | UNK | 0001 | 1.889  | 1.916  | 3.937  | 0.00 | 0.00 | C |
| HETATM | 7  | C  | UNK | 0001 | 0.611  | 1.624  | 1.680  | 0.00 | 0.00 | C |
| HETATM | 8  | C  | UNK | 0001 | -1.717 | 1.175  | 0.994  | 0.00 | 0.00 | C |
| HETATM | 9  | C  | UNK | 0001 | 0.478  | 0.611  | 0.538  | 0.00 | 0.00 | C |
| HETATM | 10 | C  | UNK | 0001 | -0.839 | 0.765  | -0.156 | 0.00 | 0.00 | C |
| HETATM | 11 | C  | UNK | 0001 | 1.156  | -0.437 | 0.036  | 0.00 | 0.00 | C |
| HETATM | 12 | C  | UNK | 0001 | -1.065 | -0.600 | -0.777 | 0.00 | 0.00 | C |
| HETATM | 13 | C  | UNK | 0001 | 0.351  | -1.124 | -1.042 | 0.00 | 0.00 | C |
| HETATM | 14 | C  | UNK | 0001 | 2.482  | -0.914 | 0.415  | 0.00 | 0.00 | C |
| HETATM | 15 | C  | UNK | 0001 | 5.030  | -1.822 | 1.147  | 0.00 | 0.00 | C |
| HETATM | 16 | C  | UNK | 0001 | 2.628  | -2.074 | 1.186  | 0.00 | 0.00 | C |
| HETATM | 17 | C  | UNK | 0001 | 3.625  | -0.213 | 0.015  | 0.00 | 0.00 | C |
| HETATM | 18 | C  | UNK | 0001 | 4.894  | -0.665 | 0.380  | 0.00 | 0.00 | C |
| HETATM | 19 | C  | UNK | 0001 | 3.897  | -2.526 | 1.551  | 0.00 | 0.00 | C |
| HETATM | 20 | C  | UNK | 0001 | -1.335 | 2.862  | 2.796  | 0.00 | 0.00 | C |
| HETATM | 21 | C  | UNK | 0001 | -2.838 | 2.966  | 2.908  | 0.00 | 0.00 | C |
| HETATM | 22 | O  | UNK | 0001 | 0.348  | -2.535 | -0.931 | 0.00 | 0.00 | O |
| HETATM | 23 | O  | UNK | 0001 | -0.635 | 3.571  | 3.512  | 0.00 | 0.00 | O |
| HETATM | 24 | H  | UNK | 0001 | 0.452  | 0.381  | 3.474  | 0.00 | 0.00 | H |
| HETATM | 25 | H  | UNK | 0001 | 2.236  | 2.438  | 0.490  | 0.00 | 0.00 | H |
| HETATM | 26 | H  | UNK | 0001 | 3.659  | 2.329  | 2.786  | 0.00 | 0.00 | H |
| HETATM | 27 | H  | UNK | 0001 | 1.394  | 4.377  | 2.643  | 0.00 | 0.00 | H |
| HETATM | 28 | H  | UNK | 0001 | 1.147  | 2.462  | 4.525  | 0.00 | 0.00 | H |
| HETATM | 29 | H  | UNK | 0001 | 1.994  | 0.258  | 2.668  | 0.00 | 0.00 | H |
| HETATM | 30 | H  | UNK | 0001 | 0.811  | 3.451  | 0.489  | 0.00 | 0.00 | H |
| HETATM | 31 | H  | UNK | 0001 | 3.276  | 3.561  | 3.985  | 0.00 | 0.00 | H |
| HETATM | 32 | H  | UNK | 0001 | 2.842  | 4.349  | 1.673  | 0.00 | 0.00 | H |
| HETATM | 33 | H  | UNK | 0001 | 2.457  | 1.322  | 4.664  | 0.00 | 0.00 | H |
| HETATM | 34 | H  | UNK | 0001 | -2.579 | 1.754  | 0.651  | 0.00 | 0.00 | H |
| HETATM | 35 | H  | UNK | 0001 | -2.080 | 0.322  | 1.579  | 0.00 | 0.00 | H |
| HETATM | 36 | H  | UNK | 0001 | -0.767 | 1.557  | -0.912 | 0.00 | 0.00 | H |
| HETATM | 37 | H  | UNK | 0001 | -1.647 | -0.535 | -1.703 | 0.00 | 0.00 | H |
| HETATM | 38 | H  | UNK | 0001 | -1.618 | -1.272 | -0.108 | 0.00 | 0.00 | H |
| HETATM | 39 | H  | UNK | 0001 | 0.705  | -0.836 | -2.038 | 0.00 | 0.00 | H |
| HETATM | 40 | H  | UNK | 0001 | 1.749  | -2.624 | 1.519  | 0.00 | 0.00 | H |
| HETATM | 41 | H  | UNK | 0001 | 3.537  | 0.689  | -0.586 | 0.00 | 0.00 | H |
| HETATM | 42 | H  | UNK | 0001 | 5.778  | -0.114 | 0.068  | 0.00 | 0.00 | H |
| HETATM | 43 | H  | UNK | 0001 | 4.000  | -3.424 | 2.155  | 0.00 | 0.00 | H |
| HETATM | 44 | H  | UNK | 0001 | 6.018  | -2.171 | 1.434  | 0.00 | 0.00 | H |
| HETATM | 45 | H  | UNK | 0001 | 1.268  | -2.824 | -1.063 | 0.00 | 0.00 | H |
| HETATM | 46 | H  | UNK | 0001 | -3.290 | 1.977  | 3.024  | 0.00 | 0.00 | H |
| HETATM | 47 | H  | UNK | 0001 | -3.244 | 3.475  | 2.030  | 0.00 | 0.00 | H |
| HETATM | 48 | H  | UNK | 0001 | -3.094 | 3.552  | 3.797  | 0.00 | 0.00 | H |
| CONECT | 1  | 7  | 8   | 20   |        |        |        |      |      |   |
| CONECT | 2  | 6  | 7   | 24   | 29     |        |        |      |      |   |
| CONECT | 3  | 5  | 7   | 25   | 30     |        |        |      |      |   |
| CONECT | 4  | 5  | 6   | 26   | 31     |        |        |      |      |   |
| CONECT | 5  | 3  | 4   | 27   | 32     |        |        |      |      |   |
| CONECT | 6  | 2  | 4   | 28   | 33     |        |        |      |      |   |
| CONECT | 7  | 1  | 2   | 3    | 9      |        |        |      |      |   |
| CONECT | 8  | 1  | 10  | 34   | 35     |        |        |      |      |   |
| CONECT | 9  | 7  | 10  | 11   |        |        |        |      |      |   |
| CONECT | 10 | 8  | 9   | 12   | 36     |        |        |      |      |   |
| CONECT | 11 | 9  | 13  | 14   |        |        |        |      |      |   |
| CONECT | 12 | 10 | 13  | 37   | 38     |        |        |      |      |   |



CONECT 13 11 12 22 39  
CONECT 14 11 16 17  
CONECT 15 18 19 44  
CONECT 16 14 19 40  
CONECT 17 14 18 41  
CONECT 18 15 17 42  
CONECT 19 15 16 43  
CONECT 20 1 21 23  
CONECT 21 20 46 47 48  
CONECT 22 13 45  
CONECT 23 20  
CONECT 24 2  
CONECT 25 3  
CONECT 26 4  
CONECT 27 5  
CONECT 28 6  
CONECT 29 2  
CONECT 30 3  
CONECT 31 4  
CONECT 32 5  
CONECT 33 6  
CONECT 34 8  
CONECT 35 8  
CONECT 36 10  
CONECT 37 12  
CONECT 38 12  
CONECT 39 13  
CONECT 40 16  
CONECT 41 17  
CONECT 42 18  
CONECT 43 19  
CONECT 44 15  
CONECT 45 22  
CONECT 46 21  
CONECT 47 21  
CONECT 48 21  
END

---

Table S3. SMILES codes of newly-synthesized compounds **3–39**.

---

C=CCNC1(C#CC2=CC=CC=C2)CCCCC1 [**3**]  
C=CCN(C(C)=O)C1(C#CC2=CC=CC=C2)CCCCC1 [**4**]  
O=C1CC(CN2C(C)=O)C(C3CCCCC3)=C1C4=CC=CC=C4 [**5**]  
C=CCNC1(C#CC2=CC=CS2)CCCCC1 [**7**]  
C=CCN(C(C)=O)C1(C#CC2=CC=CS2)CCCCC1 [**8**]  
O=C1CC(CN2C(C)=O)C(C3CCCCC3)=C1C4=CSC=C4 [**9**]  
C=CCNC1(CCCCC1)C#CC2=CC=CC=C2 [**13**]  
C=CCN(C(C)=O)C1(CCCCC1)C#CC2=CC=CC=C2 [**14**]  
O=C1CC2C(C3(CCCC3)N(C(C)=O)C2)=C1C4=CC=CC=C4 [**15**]  
C=CCNC1(C#CC2=CC=CC=C2)CCC(C)CC1 [**17**]  
C=CCN(C(C)=O)C1(C#CC2=CC=CC=C2)CCC(C)CC1 [**18**]  
O=C1CC(CN2C(C)=O)C(C3CCCC(C)CC3)=C1C4=CC=CC=C4 [**19**]  
C=CCNC1(C#CC2=CC=CC=C2)CCN(C(OC(C)(C)C)=O)CC1 [**24**]  
C=CCN(C(C)=O)C1(C#CC2=CC=CC=C2)CCN(C(OC(C)(C)C)=O)CC1 [**25**]  
O=C1CC(CN2C(C)=O)C(C3CCCC(C)CC3)=C1C4=CC=CC=C4 [**26**]  
C=CCNC1(C#CC2=CSC=C2)CCN(C(OC(C)(C)C)=O)CC1 [**27**]  
C=CCN(C(C)=O)C1(C#CC2=CSC=C2)CCN(C(OC(C)(C)C)=O)CC1 [**28**]  
O=C1CC(CN2C(C)=O)C(C3CCCC(C)CC3)=C1C4=CC=CC=C4 [**29**]  
C=CCN(C(C1=CC=CC=C1)=O)C2(C#CC3=CC=CC=C3)CCN(C(OC(C)(C)C)=O)CC2 [**30**]  
O=C1CC(C2=C1C3=CC=CC=C3)CN(C(C4=CC=CC=C4)=O)C5CCCCN(C(OC(C)(C)C)=O)CC5 [**31**]  
C=CCN(S(C1=CC=C(C)C=C1)(=O)=O)C2(C#CC3=CC=CC=C3)CCN(C(OC(C)(C)C)=O)CC2 [**32**]  
C=CCNC1(C#CC2=CC=CC=C2)CCN(S(C3=CC=C(C)C=C3)(=O)=O)CC1 [**34**]  
C=CCN(C(C)=O)C1(C#CC2=CC=CC=C2)CCN(S(C3=CC=C(C)C=C3)(=O)=O)CC1 [**35**]  
O[C@H]1C[C@@H]2C(C3(CCCCC3)N(C(C)=O)C2)=C1C4=CC=CC=C4 [**36**]  
O[C@H]1([C@@]1(O2)C3=CC=CC=C3)C[C@@H]4[C@]12C5(CCCCC5)N(C(C)=O)C4 [**37**]  
O[C@@]1(CC)C[C@@H]2C(C3(CCCCC3)N(C(C)=O)C2)=C1C4=CC=CC=C4 [**38**]  
O=C1NCC2C(C3(CCCCC3)N(C(C)=O)C2)=C1C4=CC=CC=C4 [**39**]

---

Table S4. PCA results table for the first four dimensions of compounds **3-39** (77% of data variance, as reported<sup>1</sup>; data for BB drugs are reported<sup>2</sup>).

| MOLID | PS1        | PS2        | PS3       | PS4        |
|-------|------------|------------|-----------|------------|
| [3]   | -2,7247880 | 0,7987790  | 1,0410250 | -0,397687  |
| [4]   | -2,1512250 | 0,6595260  | 1,1669390 | -0,147932  |
| [5]   | -1,6808870 | 0,6332040  | 0,8340450 | -0,676776  |
| [7]   | -2,9709880 | 0,3519120  | 0,7944920 | -0,236589  |
| [8]   | -2,3975970 | 0,2173330  | 0,9222180 | -0,000860  |
| [9]   | -1,9306430 | 0,1893000  | 0,5383170 | -0,550722  |
| [17]  | -2,5479180 | 0,7064170  | 1,1926450 | -0,460735  |
| [18]  | -1,9741770 | 0,5708770  | 1,3239130 | -0,220148  |
| [19]  | -1,5020360 | 0,5444760  | 0,9940120 | -0,727077  |
| [25]  | -0,7124530 | 0,1906550  | 1,2067520 | 0,217829   |
| [26]  | -0,2363510 | 0,1736470  | 0,8973640 | -0,277458  |
| [27]  | -1,5311490 | -0,1346300 | 0,7684920 | 0,143850   |
| [28]  | -0,9585870 | -0,2573510 | 0,9162160 | 0,347550   |
| [29]  | -0,4835390 | -0,2606540 | 0,6533650 | -0,146434  |
| [31]  | 0,9470730  | 1,4749850  | 1,7179750 | -0,316100  |
| [32]  | 0,9486110  | 1,4695560  | 2,2017410 | 0,257289   |
| [34]  | -0,3362750 | 1,9151320  | 1,4244710 | 0,035965   |
| [35]  | 0,2329640  | 1,7459930  | 1,5635560 | 0,251427   |
| [36]  | -1,5568340 | 0,3941490  | 0,5897720 | -0,930972  |
| [37]  | -1,3610130 | 0,2987730  | 0,3101600 | -1,110.214 |
| [38]  | -1,1675350 | 0,1929900  | 0,9774660 | -0,869766  |
| [39]  | -1,2681120 | 0,4766400  | 0,4326810 | -0,445033  |

<sup>1</sup> (a) Larsson, J.; Gottfries, J.; Muresan, S.; Backlund, A. *J. Nat. Prod.* **2007**, *70*, 789-794; Rosén, J.; Lövgren, A.; Kogej, T.; Muresan, S.; Gottfries, J.; Backlund, A. *J. Comput. Aided Mol. Des.* **2009**, *23*, 253-259.

<sup>2</sup> Lenci, E.; Menchi, G.; Guarna, A.; Trabocchi, A. *J. Org. Chem.* **2015**, *80*, 2182-2191

Table S5. PMI ratio calculated for compounds **3–39** (data for BB drugs are reported<sup>2</sup>).

| <b>MOLID</b> | <b>I<sub>1</sub></b> | <b>I<sub>2</sub></b> | <b>I<sub>3</sub></b> | <b>I<sub>3</sub>/I<sub>1</sub></b> | <b>I<sub>2</sub>/I<sub>1</sub></b> |
|--------------|----------------------|----------------------|----------------------|------------------------------------|------------------------------------|
| [3]          | 3111,9850            | 2645,5832            | 739,8855             | 0,2378                             | 0,8501                             |
| [4]          | 3369,4838            | 2854,3947            | 903,6792             | 0,2682                             | 0,8471                             |
| [5]          | 2712,0175            | 2296,7629            | 1289,0403            | 0,4753                             | 0,8469                             |
| [7]          | 2785,7151            | 2352,4610            | 806,7296             | 0,2896                             | 0,8445                             |
| [8]          | 3192,7712            | 2789,2532            | 893,6944             | 0,2799                             | 0,8736                             |
| [9]          | 3195,0185            | 2333,8091            | 1174,8782            | 0,3677                             | 0,7305                             |
| [13]         | 2474,8288            | 1758,8212            | 879,2849             | 0,3553                             | 0,7107                             |
| [14]         | 2963,5174            | 2452,9160            | 818,0395             | 0,2760                             | 0,8277                             |
| [15]         | 2680,3460            | 2191,9054            | 1150,3171            | 0,4292                             | 0,8178                             |
| [17]         | 3193,2808            | 2438,0791            | 1112,6207            | 0,3484                             | 0,7635                             |
| [18]         | 3577,7764            | 2787,9853            | 1297,0913            | 0,3625                             | 0,7793                             |
| [19]         | 2897,6303            | 2400,5773            | 1563,5148            | 0,5396                             | 0,8285                             |
| [24]         | 6012,3273            | 4230,0304            | 2286,6966            | 0,3803                             | 0,7036                             |
| [25]         | 4924,1262            | 3965,6326            | 2023,6716            | 0,4110                             | 0,8053                             |
| [26]         | 5719,7941            | 4443,4407            | 2561,8897            | 0,4479                             | 0,7769                             |
| [27]         | 5893,7715            | 4112,2356            | 2325,6853            | 0,3946                             | 0,6977                             |
| [28]         | 5022,0553            | 3969,5732            | 2070,2931            | 0,4122                             | 0,7904                             |
| [29]         | 6434,8851            | 5139,6846            | 1838,7006            | 0,2857                             | 0,7987                             |
| [30]         | 8276,6087            | 5162,8274            | 4212,7867            | 0,5090                             | 0,6238                             |
| [31]         | 8820,6609            | 5567,5884            | 4355,1182            | 0,4937                             | 0,6312                             |
| [32]         | 8628,6593            | 7451,6571            | 2774,6882            | 0,3216                             | 0,8636                             |
| [34]         | 7974,4679            | 6117,3092            | 2322,1633            | 0,2912                             | 0,7671                             |
| [35]         | 8420,6862            | 6410,3277            | 2732,9802            | 0,3246                             | 0,7613                             |
| [36]         | 3227,5566            | 2313,0151            | 1189,6349            | 0,3686                             | 0,7166                             |
| [37]         | 3129,0426            | 2244,2223            | 1381,8542            | 0,4416                             | 0,7172                             |
| [38]         | 3526,9533            | 2551,4946            | 1525,1176            | 0,4324                             | 0,7234                             |
| [39]         | 3305,9890            | 2255,9258            | 1382,8892            | 0,4183                             | 0,6824                             |
